# Supplementary material for: Bayesian inference of antigenic and non-antigenic variables from haemagglutination inhibition assays for influenza surveillance
Source: R Soc Open Sci. 2018 Jul 25;5(7):180113. doi: 10.1098/rsos.180113 (PMC6083687; doi:10.1098/rsos.180113)
Supplement: Supplementary Table S2 [file rsos180113supp3.xls]

## Sheet: Sheet1
strain	serum	Affinity of antibody (per M)	Log2 of affinity of antibody (per M)	Lower	Upper
BI.15793.68	HK.1.68	890928	19.7649	15.3634	23.8445
BI.15793.68	EN.42.72	3.37255e+06	21.6854	17.4774	26.0035
BI.15793.68	PC.1.73	966940	19.8831	15.4993	24.0739
BI.15793.68	VI.3A.75	1.87822e+08	27.4848	23.2027	31.8326
BI.16190.68	HK.1.68	2.90535e+06	21.4703	17.1038	25.624
BI.16190.68	EN.42.72	3.89845e+06	21.8945	17.6507	26.3067
BI.16190.68	PC.1.73	1.2601e+06	20.2651	15.8997	24.4704
BI.16190.68	SL.840.74	302253	18.2054	14.0108	22.527
BI.16190.68	VI.3A.75	2.13243e+08	27.6679	23.6483	32.3148
BI.16190.68	BI.21793.72	3.12522e+06	21.5755	17.2865	25.7864
BI.16190.68	BI.5930.74	1.77351e+06	20.7582	16.4292	25.0111
BI.16398.68	HK.1.68	6.3771e+06	22.6045	18.2954	26.8979
BI.16398.68	EN.42.72	1.71214e+07	24.0293	19.6223	28.1793
BI.16398.68	PC.1.73	5.69312e+06	22.4408	18.0437	26.68
BI.16398.68	SL.840.74	672837	19.3599	15.1665	23.7274
BI.16398.68	VI.3A.75	5.82362e+08	29.1173	24.8886	33.5449
BI.16398.68	TE.1B.77	255206	17.9613	13.8112	22.2758
BI.808.69	HK.1.68	1.45437e+06	20.472	16.2387	24.7108
BI.808.69	EN.42.72	7.8132e+06	22.8975	18.7083	27.3404
BI.808.69	PC.1.73	1.90024e+06	20.8578	16.4959	25.0986
BI.808.69	SL.840.74	607831	19.2133	14.7666	23.1549
BI.808.69	VI.3A.75	8.56792e+08	29.6744	25.3202	33.9742
BI.908.69	HK.1.68	4.86459e+06	22.2139	17.9421	26.4787
BI.908.69	EN.42.72	6.59894e+06	22.6538	18.2507	26.8291
BI.908.69	PC.1.73	1.0811e+06	20.0441	15.8883	24.4204
BI.908.69	SL.840.74	258300	17.9787	13.745	22.366
BI.908.69	VI.3A.75	2.59107e+08	27.949	23.6022	32.3194
BI.908.69	TE.1B.77	302815	18.2081	13.8732	22.5746
BI.17938.69	HK.1.68	2.36493e+06	21.1734	16.7917	25.402
BI.17938.69	EN.42.72	5.25452e+06	22.3251	18.0336	26.6742
BI.17938.69	PC.1.73	1.72244e+06	20.716	16.4584	24.9965
BI.17938.69	SL.840.74	304365	18.2154	13.8811	22.5171
BI.17938.69	VI.3A.75	2.34199e+08	27.8032	23.3792	31.8702
BI.17938.69	TE.1B.77	141729	17.1128	12.5957	21.2913
BI.93.70	HK.1.68	2.85737e+06	21.4463	17.2073	25.878
BI.93.70	EN.42.72	4.4525e+06	22.0862	18.1103	26.7475
BI.93.70	SL.840.74	246239	17.9097	13.487	22.0495
BI.93.70	VI.3A.75	1.40629e+08	27.0673	22.7766	31.29
BI.2668.70	HK.1.68	1.26909e+06	20.2754	15.9598	24.5457
BI.2668.70	EN.42.72	3.40824e+06	21.7006	17.481	26.0691
BI.2668.70	PC.1.73	1.10193e+06	20.0716	15.7872	24.2821
BI.2668.70	SL.840.74	158270	17.272	12.8711	21.4745
BI.2668.70	VI.3A.75	2.14071e+08	27.6735	23.5554	32.0923
BI.6449.71	HK.1.68	642522	19.2934	14.9406	23.429
BI.6449.71	EN.42.72	4.1166e+06	21.973	17.7485	26.4309
BI.6449.71	PC.1.73	785771	19.5837	15.1243	23.6284
BI.6449.71	VI.3A.75	1.62609e+08	27.2768	23.1961	31.6788
BI.21438.71	HK.1.68	4.36053e+06	22.0561	17.7233	26.1797
BI.21438.71	EN.42.72	1.1611e+07	23.469	18.9107	27.6138
BI.21438.71	PC.1.73	2.33598e+06	21.1556	16.9298	25.4423
BI.21438.71	SL.840.74	779570	19.5723	15.4693	24.0471
BI.21438.71	VI.3A.75	5.02448e+08	28.9044	24.7775	33.1685
BI.21438.71	TE.1B.77	252581	17.9464	13.6562	22.2567
BI.21801.71	HK.1.68	2.98062e+06	21.5072	17.292	25.871
BI.21801.71	EN.42.72	8.15224e+06	22.9588	18.6318	27.1929
BI.21801.71	PC.1.73	1.87576e+06	20.839	16.5929	25.0744
BI.21801.71	SL.840.74	543665	19.0524	14.7524	23.2302
BI.21801.71	VI.3A.75	3.39931e+08	28.3407	24.0996	32.7752
BI.21801.71	TE.1B.77	151392	17.2079	12.778	21.3657
BI.6022.72	HK.1.68	1.61523e+06	20.6233	16.2736	24.858
BI.6022.72	EN.42.72	8.67524e+06	23.0485	18.7336	27.3234
BI.6022.72	PC.1.73	2.82397e+06	21.4293	17.0961	25.73
BI.6022.72	SL.840.74	1.35672e+06	20.3717	16.1536	24.7682
BI.6022.72	VI.3A.75	7.71816e+08	29.5237	25.2324	33.7558
BI.6022.72	TE.1B.77	378958	18.5317	14.3077	22.9747
BI.5168.76	EN.42.72	957503	19.8689	15.6178	24.1653
BI.5168.76	PC.1.73	4.97061e+06	22.245	18.0548	26.6495
BI.5168.76	SL.840.74	298793	18.1888	14.2107	22.8925
BI.5168.76	VI.3A.75	3.36828e+09	31.6494	27.3743	35.9724
BI.5168.76	TE.1A.77	205688	17.6501	13.4181	22.0844
BI.4273.75	HK.1.68	148278	17.1779	12.9456	21.4438
BI.4273.75	EN.42.72	3.19453e+06	21.6072	17.2352	25.6816
BI.4273.75	PC.1.73	8.34501e+06	22.9925	18.7579	27.4305
BI.4273.75	SL.840.74	1.58255e+07	23.9157	19.5254	28.1083
BI.4273.75	VI.3A.75	1.76296e+08	27.3934	23.1047	31.5897
BI.4273.75	TE.1A.77	136654	17.0602	12.7115	21.3397
BI.334.75	EN.42.72	2.62943e+06	21.3263	17.0622	25.6795
BI.334.75	PC.1.73	1.38694e+07	23.7254	19.4369	28.0631
BI.334.75	SL.840.74	815487	19.6373	15.5084	23.9868
BI.334.75	VI.3A.75	5.85191e+08	29.1243	24.6668	33.3639
BI.334.75	TE.1A.77	70359.8	16.1025	11.8291	20.4419
BI.1843.75	HK.1.68	145383	17.1495	12.8594	21.4187
BI.1843.75	EN.42.72	1.55433e+06	20.5679	16.3537	24.9089
BI.1843.75	PC.1.73	1.62684e+07	23.9556	19.6832	28.2576
BI.1843.75	SL.840.74	977849	19.8993	15.5529	23.9616
BI.1843.75	VI.3A.75	6.84091e+08	29.3496	25.2018	33.6575
BI.1843.75	TE.1A.77	165383	17.3355	13.0448	21.6013
BI.21793.72	HK.1.68	339564	18.3733	14.1449	22.6244
BI.21793.72	EN.42.72	1.47041e+07	23.8097	19.5923	28.1958
BI.21793.72	PC.1.73	1.90037e+07	24.1798	20.0287	28.6144
BI.21793.72	SL.840.74	4.59801e+06	22.1326	17.8171	26.4942
BI.21793.72	VI.3A.75	8.0378e+08	29.5822	25.267	33.8043
BI.21793.72	TE.1A.77	195289	17.5753	13.4797	21.9612
BI.21793.72	BI.21793.72	5.92547e+06	22.4985	18.1896	26.6744
BI.21793.72	BI.5930.74	6.62562e+06	22.6596	18.4641	26.9056
BI.23290.72	HK.1.68	311614	18.2494	13.7348	22.411
BI.23290.72	EN.42.72	6.68814e+06	22.6732	18.4996	27.1089
BI.23290.72	PC.1.73	8.84144e+06	23.0758	18.9114	27.5387
BI.23290.72	SL.840.74	2.09375e+06	20.9977	16.7478	25.298
BI.23290.72	VI.3A.75	1.04129e+09	29.9557	25.6267	34.0672
BI.23290.72	TE.1B.77	816411	19.6389	15.389	24.0239
BI.23290.72	VI.3C.75	964383	19.8792	15.8134	24.4507
BI.23337.72	HK.1.68	422448	18.6884	14.3479	22.8702
BI.23337.72	EN.42.72	9.02598e+06	23.1057	18.943	27.5873
BI.23337.72	PC.1.73	1.18501e+07	23.4984	19.1506	27.6609
BI.23337.72	SL.840.74	2.80846e+06	21.4213	17.2736	25.6041
BI.23337.72	VI.3A.75	1.40296e+09	30.3858	26.2841	34.7698
BI.23337.72	TE.1B.77	1.10284e+06	20.0728	15.9856	24.5132
BI.23337.72	VI.3C.75	1.27468e+06	20.2817	16.0496	24.618
BI.552.73	HK.1.68	393052	18.5844	14.2847	22.8869
BI.552.73	EN.42.72	4.26715e+06	22.0248	17.942	26.4008
BI.552.73	PC.1.73	1.1144e+07	23.4098	19.2584	27.761
BI.552.73	SL.840.74	2.63094e+06	21.3271	17.1046	25.5358
BI.552.73	VI.3A.75	6.57461e+08	29.2923	24.8949	33.3887
BI.552.73	AM.1609.77	104153	16.6683	12.2113	20.8577
BI.552.73	BI.2461.78	78545.9	16.2612	12.0421	20.563
BI.552.73	TE.1B.77	648846	19.3075	15.0285	23.5044
BI.552.73	CO.2.86	3.67145e+06	21.8079	17.5612	26.0535
BI.552.73	VI.3C.75	607429	19.2124	15.0003	23.6063
BI.748.73	HK.1.68	307441	18.23	13.7827	22.3668
BI.748.73	EN.42.72	1.00759e+07	23.2644	18.9971	27.5782
BI.748.73	PC.1.73	2.66551e+07	24.6679	20.5292	29.0741
BI.748.73	SL.840.74	2.89748e+06	21.4664	17.2194	25.8138
BI.748.73	VI.3A.75	9.34585e+08	29.7998	25.4373	34.0206
BI.748.73	TE.1B.77	1.24603e+06	20.2489	15.8959	24.4064
BI.748.73	VI.3C.75	906348	19.7897	15.586	24.1852
BI.3517.73	HK.1.68	363168	18.4703	14.1449	22.6629
BI.3517.73	EN.42.72	1.56224e+07	23.8971	19.5093	28.1479
BI.3517.73	PC.1.73	2.04378e+07	24.2847	19.9681	28.4984
BI.3517.73	SL.840.74	2.43226e+06	21.2139	16.8813	25.5567
BI.3517.73	VI.3A.75	5.43962e+08	29.0189	24.5207	33.0495
BI.3517.73	TE.1B.77	950502	19.8583	15.5721	24.2244
BI.3517.73	VI.3C.75	555084	19.0823	14.4646	23.0893
BI.5146.74	HK.1.68	102822	16.6498	12.4972	21.0716
BI.5146.74	EN.42.72	2.2075e+06	21.074	16.9529	25.5036
BI.5146.74	PC.1.73	5.79726e+06	22.4669	18.1472	26.7583
BI.5146.74	SL.840.74	2.73985e+06	21.3857	17.1375	25.629
BI.5146.74	VI.3A.75	2.43454e+08	27.8591	23.7089	32.2174
BI.5146.74	TE.1A.77	47080.5	15.5228	11.1417	19.8502
BI.5930.74	HK.1.68	179752	17.4556	13.0644	21.5791
BI.5930.74	EN.42.72	3.89275e+06	21.8924	17.5652	26.1238
BI.5930.74	PC.1.73	4.02848e+07	25.2637	20.8616	29.6079
BI.5930.74	SL.840.74	1.20714e+06	20.2032	15.8711	24.5334
BI.5930.74	VI.3A.75	8.46334e+08	29.6567	25.3798	34.0204
BI.5930.74	TE.1A.77	209254	17.6749	13.2017	21.8813
BI.5930.74	BI.21793.72	3.12296e+06	21.5745	17.1405	25.7363
BI.5930.74	BI.5930.74	7.00844e+06	22.7407	18.3427	26.939
BI.5931.74	HK.1.68	73633.6	16.1681	11.8961	20.5908
BI.5931.74	EN.42.72	3.57503e+06	21.7695	17.6059	26.1699
BI.5931.74	PC.1.73	1.47139e+07	23.8107	19.5291	28.1662
BI.5931.74	SL.840.74	618624	19.2387	14.8171	23.2362
BI.5931.74	VI.3A.75	1.73838e+09	30.6951	26.5111	35.0607
BI.5931.74	TE.1A.77	127497	16.9601	12.769	21.3034
BI.7398.74	HK.1.68	93603.4	16.5143	12.3525	20.8905
BI.7398.74	EN.42.72	4.02419e+06	21.9403	17.7379	26.256
BI.7398.74	PC.1.73	4.1947e+07	25.3221	21.2299	29.7421
BI.7398.74	SL.840.74	2.49353e+06	21.2498	16.9103	25.4837
BI.7398.74	VI.3A.75	4.4058e+08	28.7148	24.5062	33.0002
BI.7398.74	TE.1A.77	107412	16.7128	12.5743	21.0918
BI.9459.74	HK.1.68	295811	18.1743	13.6501	22.3338
BI.9459.74	EN.42.72	5.17593e+06	22.3034	18.0729	26.7655
BI.9459.74	PC.1.73	4.47874e+07	25.4166	21.0089	29.568
BI.9459.74	SL.840.74	2.66731e+06	21.347	16.9764	25.4151
BI.9459.74	VI.3A.75	1.47301e+09	30.4561	26.1284	34.6933
BI.9459.74	AM.1609.77	210930	17.6864	13.4422	21.99
BI.9459.74	TE.1B.77	1.05249e+06	20.0054	15.6822	24.1577
BI.9459.74	CO.2.86	7.34492e+06	22.8083	18.4368	27.0488
BI.9459.74	VI.3C.75	2.43641e+06	21.2163	17.0362	25.4892
BI.2600.75	HK.1.68	497850	18.9254	14.4861	23.0299
BI.2600.75	EN.42.72	5.34287e+06	22.3492	18.1857	26.7195
BI.2600.75	PC.1.73	2.79217e+07	24.7349	20.4827	28.9432
BI.2600.75	SL.840.74	2.68216e+07	24.6769	20.4953	29.1327
BI.2600.75	VI.3A.75	2.92205e+08	28.1224	23.864	32.4998
BI.2600.75	TE.1A.77	285034	18.1208	13.8397	22.4321
BI.2813.75	HK.1.68	208023	17.6664	13.3534	21.8684
BI.2813.75	EN.42.72	4.51102e+06	22.105	17.6468	26.26
BI.2813.75	PC.1.73	2.35751e+07	24.4908	20.1614	28.8125
BI.2813.75	SL.840.74	1.40186e+06	20.4189	16.2163	24.8714
BI.2813.75	VI.3A.75	4.96044e+08	28.8859	24.6866	33.1919
BI.2813.75	TE.1A.77	479489	18.8711	14.59	23.2184
BI.2813.75	BI.21793.72	1.82678e+06	20.8009	16.702	25.1835
BI.2813.75	BI.5930.74	8.24195e+06	22.9746	18.74	27.2291
BI.628.76	EN.42.72	1.67066e+06	20.672	16.3457	24.8383
BI.628.76	PC.1.73	5.82279e+06	22.4733	18.1958	26.8437
BI.628.76	SL.840.74	693560	19.4037	15.229	23.8178
BI.628.76	VI.3A.75	4.89827e+08	28.8677	24.4676	33.1712
BI.628.76	TE.1A.77	7.66563e+06	22.87	18.85	27.3202
BI.628.76	NL.330.85	3.53729e+06	21.7542	17.5573	26.23
BI.628.76	BA.1.79	408719	18.6408	14.27	22.8982
BI.628.76	PH.2.82	1.37193e+09	30.3536	26.1837	34.6921
BI.628.76	WE.4.85	4.57545e+06	22.1255	17.8819	26.3727
BI.628.76	EN.496.80	4.31095e+06	22.0396	17.8571	26.2215
BI.1761.76	EN.42.72	4.27453e+06	22.0273	17.8478	26.2314
BI.1761.76	PC.1.73	5.61927e+06	22.422	18.1991	26.7196
BI.1761.76	SL.840.74	1.32439e+06	20.3369	16.0988	24.6667
BI.1761.76	VI.3A.75	5.96761e+09	32.4745	28.1588	36.8388
BI.1761.76	TE.1A.77	460638	18.8133	14.5159	23.0781
BI.1761.76	AM.1609.77	1.34084e+07	23.6766	19.3807	27.8828
BI.1761.76	BI.2461.78	636786	19.2804	15.1597	23.8704
BI.1761.76	NL.330.85	561816	19.0997	14.7388	23.2922
BI.1761.76	ST.10.85	862385	19.718	15.3814	24.0151
BI.1761.76	PH.2.82	4.35556e+08	28.6983	24.3151	32.8542
BI.1761.76	WE.4.85	1.46768e+06	20.4851	16.3748	24.9488
BI.1761.76	TE.1B.77	2.08898e+06	20.9944	16.5177	25.0757
BI.1761.76	CE.1B.84	3.04007e+07	24.8576	20.565	29.1831
BI.1761.76	CO.2.86	1.18389e+08	26.819	22.4785	31.0088
BI.1761.76	VI.3C.75	1.96602e+07	24.2288	20.0429	28.5294
BI.2271.76	EN.42.72	1.71766e+06	20.712	16.1811	24.8277
BI.2271.76	PC.1.73	1.1851e+07	23.4985	19.0411	27.6064
BI.2271.76	SL.840.74	1.41253e+06	20.4298	16.3032	24.7386
BI.2271.76	VI.3A.75	9.95909e+08	29.8914	25.2921	34.0404
BI.2271.76	TE.1A.77	1.23177e+07	23.5542	19.3016	27.8386
BI.2271.76	NL.330.85	4.76269e+06	22.1833	17.6735	26.4232
BI.2271.76	BA.1.79	833950	19.6696	15.2665	23.8017
BI.2271.76	PH.2.82	1.84047e+09	30.7774	26.3278	34.8546
BI.2271.76	WE.4.85	6.18789e+06	22.561	18.3137	26.8838
BI.2271.76	EN.496.80	4.39573e+06	22.0677	17.7797	26.1575
BI.5029.76	EN.42.72	1.08828e+06	20.0536	15.7117	24.3835
BI.5029.76	PC.1.73	1.4179e+06	20.4353	16.0253	24.6501
BI.5029.76	SL.840.74	170577	17.3801	13.1859	21.7414
BI.5029.76	VI.3A.75	2.66317e+09	31.3105	26.9241	35.4893
BI.5029.76	TE.1A.77	233115	17.8307	13.4143	22.0633
BI.5029.76	AM.1609.77	6.86371e+06	22.7106	18.3048	26.8768
BI.5029.76	BI.2461.78	324107	18.3061	14.1134	22.5917
BI.5029.76	ST.10.85	439242	18.7447	14.4217	22.8953
BI.5029.76	WE.4.85	743134	19.5033	14.9839	23.6366
BI.5029.76	TE.1B.77	1.06239e+06	20.0189	15.6259	24.2206
BI.5029.76	BA.2.79	390253	18.5741	14.2995	22.8411
BI.5029.76	CO.2.86	5.96375e+07	25.8297	21.3631	29.9431
BI.5029.76	VI.3C.75	1.49036e+07	23.8292	19.5522	28.0658
BI.5657.76	EN.42.72	2.38762e+06	21.1871	16.7381	25.3771
BI.5657.76	PC.1.73	6.19771e+06	22.5633	18.127	26.7051
BI.5657.76	SL.840.74	745112	19.5071	15.1684	23.8037
BI.5657.76	VI.3A.75	5.97156e+09	32.4755	28.2252	36.8314
BI.5657.76	TE.1A.77	628543	19.2617	15.0682	23.6115
BI.5657.76	AM.1609.77	1.50756e+07	23.8457	19.6856	28.1527
BI.5657.76	BI.2461.78	715491	19.4486	15.1372	23.6036
BI.5657.76	ST.10.85	965767	19.8813	15.7023	24.2199
BI.5657.76	WE.4.85	2.03783e+06	20.9586	16.6651	25.2958
BI.5657.76	TE.1B.77	2.35325e+06	21.1662	16.9523	25.501
BI.5657.76	BA.2.79	1.38718e+06	20.4037	16.2128	24.6404
BI.5657.76	CE.1B.84	3.41718e+07	25.0263	20.7585	29.39
BI.5657.76	CO.2.86	9.84917e+07	26.5535	22.2441	30.8503
BI.5657.76	VI.3C.75	2.17108e+07	24.3719	20.1315	28.71
BI.6545.76	EN.42.72	2.58071e+06	21.2993	17.0843	25.5647
BI.6545.76	PC.1.73	5.15795e+06	22.2984	17.9658	26.5022
BI.6545.76	SL.840.74	622654	19.2481	14.7905	23.3924
BI.6545.76	VI.3A.75	4.86878e+09	32.1809	27.843	36.3351
BI.6545.76	LE.360.86	366089	18.4818	14.3326	22.7455
BI.6545.76	TE.1A.77	323237	18.3022	14.1052	22.7108
BI.6545.76	AM.1609.77	1.56397e+07	23.8987	19.5382	28.0832
BI.6545.76	BI.2461.78	589499	19.1691	15.0324	23.499
BI.6545.76	NL.330.85	518044	18.9827	14.7528	23.2631
BI.6545.76	ST.10.85	795849	19.6021	15.3707	23.8995
BI.6545.76	PH.2.82	4.05467e+08	28.595	24.4467	32.9883
BI.6545.76	CC.4.85	200259	17.6115	13.112	21.7527
BI.6545.76	WE.4.85	942292	19.8458	15.6778	24.3002
BI.6545.76	TE.1B.77	1.92566e+06	20.8769	16.5815	25.0203
BI.6545.76	BA.2.79	706454	19.4302	15.069	23.6197
BI.6545.76	CE.1B.84	2.84904e+07	24.764	20.6172	29.2326
BI.6545.76	CO.2.86	1.09929e+08	26.712	22.3198	30.8884
BI.6545.76	VI.3C.75	1.78441e+07	24.0889	19.8747	28.4215
AM.1609.77	HK.1.68	20322.2	14.3108	10.1798	18.6269
AM.1609.77	EN.42.72	1.7484e+06	20.7376	16.5836	24.967
AM.1609.77	PC.1.73	2.29447e+06	21.1297	16.6055	25.2985
AM.1609.77	SL.840.74	275315	18.0707	13.7507	22.2746
AM.1609.77	VI.3A.75	6.14951e+09	32.5178	28.3113	36.8118
AM.1609.77	TE.1A.77	247113	17.9148	13.675	22.0526
AM.1609.77	BI.21793.72	358667	18.4523	14.1565	22.8776
AM.1609.77	BI.5930.74	1.59463e+06	20.6048	16.0941	24.7315
AM.1609.77	AM.1609.77	1.11363e+07	23.4088	19.1086	27.7505
AM.1609.77	NL.209.80	796818	19.6039	15.3801	23.9879
AM.1609.77	NL.233.82	226360	17.7883	13.4296	21.9797
AM.1609.77	NL.241.82	2.04097e+07	24.2827	20.0145	28.5534
AM.1609.77	NL.330.85	405997	18.6311	14.2345	22.8393
AM.1609.77	ST.10.85	706669	19.4307	14.9564	23.4866
AM.1609.77	PH.2.82	3.62082e+08	28.4317	24.1623	32.6744
AM.1609.77	WE.4.85	602275	19.2001	14.6054	23.2235
AM.1609.77	EN.496.80	283660	18.1138	14.0236	22.6467
BI.3895.77	HK.1.68	42168.3	15.3639	11.1414	19.6588
BI.3895.77	EN.42.72	3.63825e+06	21.7948	17.4739	26.0397
BI.3895.77	PC.1.73	4.79971e+06	22.1945	18.0267	26.6637
BI.3895.77	SL.840.74	1.13714e+06	20.117	15.8486	24.5704
BI.3895.77	VI.3A.75	5.09447e+09	32.2463	27.8617	36.6115
BI.3895.77	TE.1A.77	377096	18.5246	14.3033	22.7938
BI.3895.77	AM.1609.77	1.14355e+07	23.447	19.0987	27.6328
BI.3895.77	BI.2461.78	540506	19.044	14.6621	23.3415
BI.3895.77	NL.330.85	714675	19.4469	15.2288	23.756
BI.3895.77	ST.10.85	732130	19.4817	14.9565	23.7499
BI.3895.77	PH.2.82	5.59772e+08	29.0603	24.7236	33.2873
BI.3895.77	WE.4.85	1.25188e+06	20.2557	15.9194	24.428
BI.3895.77	TE.1B.77	1.77948e+06	20.763	16.602	25.2305
BI.3895.77	BA.2.79	1.04383e+06	19.9934	15.4275	24.0302
BI.3895.77	CE.1B.84	2.60576e+07	24.6352	20.5188	28.9994
BI.3895.77	CO.2.86	1.00106e+08	26.577	22.252	30.9145
BI.3895.77	VI.3C.75	1.45642e+07	23.7959	19.5261	28.0549
RD.5828.77	HK.1.68	351543	18.4233	14.0697	22.7487
RD.5828.77	EN.42.72	5.00939e+06	22.2562	18.1586	26.7113
RD.5828.77	PC.1.73	6.55125e+06	22.6433	18.4508	27.0425
RD.5828.77	SL.840.74	3.10987e+06	21.5684	17.3866	25.9095
RD.5828.77	VI.3A.75	6.30324e+09	32.5534	28.3417	36.8399
RD.5828.77	TE.1A.77	1.20848e+06	20.2048	15.7266	24.4628
RD.5828.77	AM.1609.77	1.58007e+07	23.9135	19.7291	28.3225
RD.5828.77	BI.2461.78	657583	19.3268	14.995	23.6101
RD.5828.77	ST.10.85	252132	17.9438	13.7409	22.2326
RD.5828.77	WE.4.85	432749	18.7232	14.416	22.9413
RD.5828.77	VI.7.87	142752	17.1232	12.892	21.2741
RD.5828.77	TE.1B.77	931342	19.829	15.5176	24.1099
RD.5828.77	BA.2.79	180294	17.46	12.8479	21.3937
RD.5828.77	CE.1B.84	3.57713e+07	25.0923	20.755	29.4943
RD.5828.77	CO.2.86	1.74322e+07	24.0553	19.8623	28.4914
RD.5828.77	VI.3C.75	1.14656e+07	23.4508	19.0845	27.6849
RD.8179.77	HK.1.68	220161	17.7482	13.3619	21.8947
RD.8179.77	EN.42.72	4.76466e+06	22.1839	17.9645	26.513
RD.8179.77	PC.1.73	1.24371e+07	23.5681	19.4371	27.9338
RD.8179.77	SL.840.74	1.48033e+06	20.4975	16.0979	24.7792
RD.8179.77	VI.3A.75	7.78955e+09	32.8589	28.5868	37.2613
RD.8179.77	TE.1A.77	792099	19.5953	15.2396	23.7263
RD.8179.77	AM.1609.77	2.99163e+07	24.8344	20.5193	29.0752
RD.8179.77	BI.2461.78	883647	19.7531	15.5022	24.05
RD.8179.77	ST.10.85	952729	19.8617	15.5849	24.112
RD.8179.77	WE.4.85	1.62992e+06	20.6364	16.4085	25.0887
RD.8179.77	TE.1B.77	2.31958e+06	21.1454	16.9226	25.5489
RD.8179.77	BA.2.79	689073	19.3943	15.2263	23.8026
RD.8179.77	CO.2.86	1.30353e+08	26.9578	22.74	31.2947
RD.8179.77	VI.3C.75	2.16511e+07	24.3679	20.0756	28.5818
NL.209.80	EN.42.72	111815	16.7708	12.5911	21.1285
NL.209.80	VI.3A.75	1.87835e+08	27.4849	23.0296	31.6017
NL.209.80	LE.360.86	1.7912e+06	20.7725	16.4366	24.924
NL.209.80	TE.1A.77	1.35841e+06	20.3735	15.8435	24.606
NL.209.80	BI.5930.74	270853	18.0471	13.9083	22.4152
NL.209.80	AM.1609.77	1.33771e+06	20.3513	15.78	24.3317
NL.209.80	BI.2461.78	1.61833e+07	23.948	19.6116	28.2511
NL.209.80	RD.577.80	1.27784e+08	26.9291	22.5418	31.0474
NL.209.80	NL.209.80	8.62391e+06	23.0399	18.9672	27.4674
NL.209.80	NL.233.82	4.94186e+06	22.2366	18.006	26.6532
NL.209.80	NL.241.82	2.24194e+08	27.7402	23.2442	31.8557
NL.209.80	NL.330.85	3.99969e+06	21.9315	17.6943	26.2549
NL.209.80	ST.10.85	8.75263e+06	23.0613	18.7083	27.2791
NL.209.80	BA.1.79	1.64658e+06	20.651	16.5086	24.9849
NL.209.80	PH.2.82	2.58974e+09	31.2702	27.0092	35.4809
NL.209.80	CC.4.85	2.95045e+06	21.4925	17.2071	25.7339
NL.209.80	WE.4.85	6.56305e+06	22.6459	18.4621	26.9613
NL.209.80	VI.7.87	84771.7	16.3713	12.1411	20.672
NL.209.80	SI.2.87	325803	18.3136	14.0879	22.6704
NL.209.80	TE.1B.77	9.41952e+06	23.1672	18.9634	27.5282
NL.209.80	BA.2.79	4.38209e+06	22.0632	17.7239	26.211
NL.209.80	CE.1B.84	2.07282e+08	27.627	23.4108	31.9948
NL.209.80	CO.2.86	2.11899e+09	30.9807	26.8514	35.4094
NL.209.80	BE.353.89	91624.5	16.4834	12.3814	20.9477
NL.209.80	SH.31.80	2.34199e+06	21.1593	16.6655	25.2459
NL.209.80	VI.3C.75	4.82186e+06	22.2012	18.1006	26.623
RD.577.80	EN.42.72	152009	17.2138	12.9392	21.6125
RD.577.80	VI.3A.75	3.53213e+08	28.396	24.203	32.6983
RD.577.80	LE.360.86	5.43909e+06	22.3749	18.138	26.559
RD.577.80	TE.1A.77	4.64934e+06	22.1486	17.9389	26.4592
RD.577.80	BI.5930.74	548062	19.064	14.8347	23.4456
RD.577.80	AM.1609.77	3.80263e+06	21.8586	17.3655	25.9184
RD.577.80	BI.2461.78	2.20944e+07	24.3972	20.1533	28.8197
RD.577.80	RD.577.80	1.28561e+08	26.9379	22.6684	31.2456
RD.577.80	NL.209.80	3.47352e+07	25.0499	20.7982	29.4699
RD.577.80	NL.233.82	1.97704e+07	24.2368	19.9105	28.5619
RD.577.80	NL.241.82	4.50874e+08	28.7481	24.4563	33.035
RD.577.80	NL.330.85	8.08086e+06	22.9461	18.8039	27.3335
RD.577.80	ST.10.85	1.56334e+07	23.8981	19.8022	28.36
RD.577.80	BA.1.79	2.48526e+06	21.245	17.0112	25.583
RD.577.80	PH.2.82	5.20614e+09	32.2776	28.1635	36.7378
RD.577.80	CC.4.85	6.91187e+06	22.7206	18.386	26.9712
RD.577.80	WE.4.85	9.99258e+06	23.2524	18.9024	27.5809
RD.577.80	VI.7.87	193915	17.5651	13.2875	21.9405
RD.577.80	SI.2.87	659781	19.3316	15.0267	23.5981
RD.577.80	TE.1B.77	1.8953e+07	24.1759	19.8874	28.3987
RD.577.80	BA.2.79	7.84909e+06	22.9041	18.6357	27.3351
RD.577.80	EN.496.80	1.9568e+07	24.222	19.9141	28.431
RD.577.80	CE.1B.84	3.09606e+08	28.2059	23.9122	32.4363
RD.577.80	CO.2.86	3.38656e+09	31.6572	27.5191	35.9925
RD.577.80	SH.31.80	4.75785e+06	22.1819	17.8198	26.5105
RD.577.80	VI.3C.75	1.11356e+07	23.4087	18.9585	27.6811
NL.233.82	VI.3A.75	1.24411e+08	26.8905	22.6555	31.1708
NL.233.82	AM.1609.77	2.48843e+06	21.2468	16.9718	25.4921
NL.233.82	BI.2461.78	7.60694e+06	22.8589	18.7076	27.2056
NL.233.82	RD.577.80	5.96549e+07	25.8301	21.2876	29.9796
NL.233.82	NL.209.80	8.12059e+06	22.9532	18.8412	27.3796
NL.233.82	NL.233.82	1.85966e+07	24.1485	19.91	28.5579
NL.233.82	NL.241.82	8.31659e+08	29.6314	25.4859	34.0433
NL.233.82	NL.330.85	1.88675e+07	24.1694	20.0158	28.5273
NL.233.82	ST.10.85	1.02587e+07	23.2903	19.0413	27.5212
NL.233.82	NL.450.88	230206	17.8126	13.3845	21.9269
NL.233.82	WE.4.85	9.24548e+06	23.1403	18.7873	27.3752
NL.233.82	VI.7.87	255384	17.9623	13.4596	22.0882
NL.233.82	TE.1B.77	4.40357e+06	22.0702	17.7988	26.3531
NL.233.82	BA.2.79	5.20018e+06	22.3101	17.8604	26.495
NL.233.82	EN.496.80	5.82145e+06	22.4729	18.1553	26.6994
NL.233.82	CE.1B.84	1.94105e+08	27.5323	23.2853	31.8282
NL.233.82	CO.2.86	9.85627e+08	29.8765	25.6544	34.1818
NL.233.82	BE.353.89	170927	17.383	13.1383	21.6695
NL.233.82	VI.3C.75	3.20618e+06	21.6124	17.1625	25.9283
NL.241.82	VI.3A.75	2.63582e+08	27.9737	23.7656	32.3343
NL.241.82	TE.1A.77	1.28379e+06	20.292	16.1116	24.6562
NL.241.82	AM.1609.77	2.04483e+06	20.9636	16.7384	25.2528
NL.241.82	BI.2461.78	8.81427e+06	23.0714	18.804	27.4012
NL.241.82	RD.577.80	3.23536e+07	24.9474	20.387	28.9969
NL.241.82	NL.209.80	1.72921e+07	24.0436	19.8249	28.4371
NL.241.82	NL.233.82	9.93803e+06	23.2445	18.926	27.4877
NL.241.82	NL.241.82	4.44883e+08	28.7289	24.5705	33.1773
NL.241.82	NL.330.85	9.98631e+06	23.2515	18.9074	27.4239
NL.241.82	ST.10.85	1.55757e+07	23.8928	19.5032	28.0108
NL.241.82	NL.450.88	489448	18.9008	14.3861	23.063
NL.241.82	WE.4.85	1.30679e+07	23.6395	19.2781	27.9202
NL.241.82	VI.7.87	274857	18.0683	13.8922	22.4156
NL.241.82	TE.1B.77	9.46151e+06	23.1736	18.9465	27.4166
NL.241.82	BA.2.79	9.62436e+06	23.1983	19.0939	27.7543
NL.241.82	EN.496.80	1.23632e+07	23.5596	19.3669	27.9836
NL.241.82	CE.1B.84	1.96498e+08	27.5499	23.206	31.7629
NL.241.82	CO.2.86	1.49591e+09	30.4784	26.3244	34.8532
NL.241.82	BE.353.89	319414	18.2851	14.0917	22.6612
NL.241.82	VI.3C.75	5.44445e+06	22.3764	18.1005	26.7437
NL.330.85	VI.3A.75	1.15576e+08	26.7843	22.3236	30.9907
NL.330.85	TE.1A.77	906288	19.7896	15.4588	23.9934
NL.330.85	BI.2461.78	3.45277e+06	21.7193	17.3545	26.0921
NL.330.85	RD.577.80	1.39775e+07	23.7366	19.2687	27.8077
NL.330.85	NL.209.80	3.80568e+06	21.8597	17.4126	25.9567
NL.330.85	NL.233.82	2.14061e+06	21.0296	16.6746	25.2575
NL.330.85	NL.241.82	1.94749e+08	27.537	23.1731	31.7396
NL.330.85	NL.330.85	1.25428e+07	23.5804	19.2245	27.9736
NL.330.85	ST.10.85	1.50799e+07	23.8461	19.7055	28.289
NL.330.85	NL.450.88	1.71606e+06	20.7107	16.5912	25.2338
NL.330.85	BA.1.79	384044	18.5509	14.3139	22.9124
NL.330.85	PH.2.82	6.90674e+09	32.6854	28.5368	37.1783
NL.330.85	WE.4.85	2.15727e+07	24.3627	20.2347	28.8451
NL.330.85	VI.7.87	675523	19.3656	14.8	23.4682
NL.330.85	TE.1B.77	2.05016e+06	20.9673	16.5321	25.175
NL.330.85	BA.2.79	4.80295e+06	22.1955	17.9186	26.5088
NL.330.85	EN.496.80	4.27689e+06	22.0281	17.8942	26.5687
NL.330.85	CE.1B.84	4.16745e+08	28.6346	24.521	33.1605
NL.330.85	CO.2.86	3.22178e+09	31.5852	27.4023	35.9352
NL.330.85	BE.353.89	201803	17.6226	13.245	21.7118
NL.330.85	VI.3C.75	2.40668e+06	21.1986	16.8991	25.4098
ST.10.85	VI.3A.75	2.26202e+08	27.753	23.5139	32.1469
ST.10.85	BI.2461.78	2.74789e+06	21.3899	17.2667	25.8339
ST.10.85	RD.577.80	1.36702e+07	23.7045	19.4325	27.9544
ST.10.85	NL.209.80	3.70535e+06	21.8212	17.5397	26.04
ST.10.85	NL.233.82	2.08911e+06	20.9945	16.8869	25.4567
ST.10.85	NL.241.82	3.79972e+08	28.5013	24.0785	32.7111
ST.10.85	NL.330.85	1.73994e+07	24.0525	19.8363	28.344
ST.10.85	ST.10.85	3.78051e+07	25.1721	20.9593	29.5169
ST.10.85	NL.450.88	3.36135e+06	21.6806	17.5376	26.1249
ST.10.85	LY.1149.91	791092	19.5935	15.237	23.8301
ST.10.85	WE.4.85	2.25713e+07	24.428	20.2448	28.8298
ST.10.85	VI.7.87	3.73268e+06	21.8318	17.5535	26.1861
ST.10.85	TE.1B.77	2.02309e+06	20.9481	16.562	25.2011
ST.10.85	BA.2.79	4.75476e+06	22.1809	17.568	26.1584
ST.10.85	EN.496.80	2.65018e+06	21.3377	17.0593	25.6763
ST.10.85	CE.1B.84	5.92966e+08	29.1434	24.8536	33.464
ST.10.85	CO.2.86	3.18466e+09	31.5685	27.2222	35.707
ST.10.85	BE.353.89	1.26574e+06	20.2715	15.8778	24.4391
ST.10.85	VI.3C.75	1.17717e+06	20.1669	15.9892	24.5029
CO.2.86	VI.3A.75	1.87112e+08	27.4793	23.0958	31.7016
CO.2.86	LE.360.86	1.44896e+07	23.7885	19.6245	28.2068
CO.2.86	TE.1A.77	1.04025e+06	19.9885	15.7436	24.3782
CO.2.86	BI.2461.78	2.07374e+06	20.9838	16.5903	25.2068
CO.2.86	RD.577.80	1.62475e+07	23.9537	19.7686	28.2698
CO.2.86	NL.209.80	4.36744e+06	22.0584	17.7698	26.3666
CO.2.86	NL.233.82	2.49842e+06	21.2526	16.947	25.5641
CO.2.86	NL.241.82	4.52261e+08	28.7526	24.5572	33.2412
CO.2.86	NL.330.85	1.01303e+07	23.2722	18.9759	27.6455
CO.2.86	ST.10.85	4.44362e+07	25.4052	21.0383	29.6497
CO.2.86	NL.450.88	7.96434e+06	22.9251	18.4822	27.0819
CO.2.86	LY.1149.91	941150	19.8441	15.5224	23.9711
CO.2.86	BA.1.79	377474	18.526	14.3643	23.0279
CO.2.86	PH.2.82	3.55806e+09	31.7284	27.3709	35.895
CO.2.86	CC.4.85	3.96411e+06	21.9186	17.7119	26.1991
CO.2.86	WE.4.85	2.4784e+07	24.5629	20.3152	28.9504
CO.2.86	VI.7.87	2.18805e+06	21.0612	16.7427	25.2857
CO.2.86	SI.2.87	995157	19.9246	15.4277	24.0137
CO.2.86	TE.1B.77	2.95065e+06	21.4926	17.2646	25.7894
CO.2.86	BA.2.79	8.33203e+06	22.9902	18.7634	27.4533
CO.2.86	EN.496.80	3.77756e+06	21.849	17.4119	26.018
CO.2.86	NL.333.85	5.57829e+06	22.4114	18.1363	26.69
CO.2.86	CE.1B.84	1.74596e+08	27.3794	23.1234	31.5558
CO.2.86	CO.2.86	4.31246e+09	32.0059	27.6144	36.3113
CO.2.86	BE.353.89	1.49026e+06	20.5071	16.1489	24.732
CO.2.86	VI.3C.75	2.10171e+06	21.0031	16.5814	25.1439
NL.450.88	VI.3A.75	1.07224e+08	26.676	22.233	30.973
NL.450.88	TE.1A.77	273228	18.0597	13.5388	22.0785
NL.450.88	NL.330.85	3.5601e+06	21.7635	17.4891	26.0267
NL.450.88	ST.10.85	1.25323e+07	23.5792	19.2899	27.864
NL.450.88	NL.450.88	2.82657e+07	24.7525	20.5553	29.1086
NL.450.88	VI.2.90	6.37832e+06	22.6047	18.3263	26.7751
NL.450.88	LY.1149.91	3.00596e+06	21.5194	17.2656	25.9302
NL.450.88	BA.1.79	160780	17.2947	13.1691	21.6778
NL.450.88	PH.2.82	3.29474e+08	28.2956	23.8257	32.3793
NL.450.88	WE.4.85	2.30742e+07	24.4598	20.3545	28.7696
NL.450.88	VI.7.87	4.94054e+06	22.2362	18.0325	26.7487
NL.450.88	SI.2.87	1.84275e+07	24.1354	19.8529	28.5676
NL.450.88	TE.1B.77	723479	19.4646	15.2496	23.8621
NL.450.88	BA.2.79	1.12338e+06	20.0994	15.7236	24.3857
NL.450.88	CE.1B.84	1.96408e+08	27.5493	23.0818	31.5964
NL.450.88	CO.2.86	1.58253e+09	30.5596	26.2961	34.8155
NL.450.88	SH.11.87	1.43736e+08	27.0988	22.6604	31.3165
NL.450.88	NL.620.89	5.19175e+07	25.6297	21.3219	29.9052
NL.450.88	GU.54.89	8.33726e+07	26.3131	22.0444	30.5872
NL.450.88	BE.353.89	2.55085e+06	21.2825	17.1106	25.7218
NL.620.89	VI.3A.75	6.49952e+07	25.9538	21.551	30.1373
NL.620.89	NL.330.85	1.75346e+06	20.7418	16.3134	24.9571
NL.620.89	ST.10.85	5.36932e+06	22.3563	17.887	26.5069
NL.620.89	NL.450.88	7.77531e+06	22.8905	18.4309	27.1128
NL.620.89	VI.2.90	1.14045e+06	20.1212	15.754	24.3221
NL.620.89	LY.1149.91	3.60527e+06	21.7817	17.475	25.9581
NL.620.89	WE.4.85	1.1262e+07	23.425	19.0587	27.5912
NL.620.89	VI.7.87	4.28254e+06	22.03	17.7323	26.4189
NL.620.89	SI.2.87	5.15542e+06	22.2977	17.9478	26.5849
NL.620.89	TE.1B.77	72341.7	16.1425	11.9143	20.3676
NL.620.89	BA.2.79	168836	17.3653	13.1233	21.7985
NL.620.89	CE.1B.84	3.41102e+07	25.0237	20.8396	29.4299
NL.620.89	CO.2.86	5.20849e+08	28.9563	24.6912	33.2522
NL.620.89	SH.11.87	1.13935e+08	26.7636	22.4111	31.0128
NL.620.89	NL.620.89	6.26415e+07	25.9006	21.5858	30.1455
NL.620.89	GU.54.89	5.07069e+07	25.5957	21.2967	29.8497
NL.620.89	BE.353.89	1.80166e+06	20.7809	16.5289	25.0117
VI.2.90	ST.10.85	7.58456e+06	22.8546	18.5685	27.2365
VI.2.90	NL.450.88	3.05099e+06	21.5408	17.2115	25.8659
VI.2.90	VI.2.90	1.40385e+07	23.7429	19.4642	28.1233
VI.2.90	LY.1149.91	2.05418e+07	24.2921	19.9928	28.6365
VI.2.90	NL.172.96	173104	17.4013	13.1482	21.7687
VI.2.90	WE.4.85	3.2212e+06	21.6192	17.4148	25.867
VI.2.90	VI.7.87	8.64837e+06	23.044	18.7677	27.3077
VI.2.90	SI.2.87	1.2823e+06	20.2903	15.8604	24.5903
VI.2.90	CO.2.86	2.60093e+08	27.9545	23.7886	32.4385
VI.2.90	SH.11.87	4.68204e+06	22.1587	17.8524	26.4497
VI.2.90	NL.620.89	2.07432e+07	24.3061	20.2573	28.6716
VI.2.90	GU.54.89	3.15154e+06	21.5876	17.297	25.7823
VI.2.90	BE.353.89	1.15707e+07	23.464	19.3171	27.8377
VI.2.90	BE.32A.92	2.39008e+06	21.1886	16.9653	25.6358
LY.1149.91	ST.10.85	4.40028e+06	22.0692	17.9013	26.3205
LY.1149.91	NL.450.88	704243	19.4257	15.1525	23.7384
LY.1149.91	VI.2.90	4.22836e+06	22.0117	17.8074	26.3391
LY.1149.91	LY.1149.91	1.69951e+07	24.0186	19.7007	28.354
LY.1149.91	WE.4.85	923451	19.8167	15.6519	24.2494
LY.1149.91	SI.2.87	371727	18.5039	14.2416	22.7148
LY.1149.91	CO.2.86	7.56988e+07	26.1738	21.9813	30.653
LY.1149.91	SH.11.87	1.03288e+06	19.9782	15.8976	24.3613
LY.1149.91	NL.620.89	4.53695e+06	22.1133	17.9261	26.6026
LY.1149.91	BE.353.89	3.40409e+06	21.6988	17.5025	26.0819
LY.1149.91	HK.34.90	385753	18.5573	14.284	22.9212
LY.1149.91	BE.32B.92	910500	19.7963	15.5543	24.0757
LY.1149.91	OS.2352.93	1.38978e+06	20.4064	15.9921	24.6108
LY.1149.91	PR.413.94	1.16089e+06	20.1468	15.9073	24.348
LY.1149.91	GE.A9509.95	655994	19.3233	14.839	23.5162
LY.1149.91	FI.338.95	331809	18.34	14.0236	22.6255
LY.1149.91	NL.47.95	184440	17.4928	13.0418	21.6721
MA.G102.93	NL.450.88	222752	17.7651	13.5826	22.0871
MA.G102.93	MA.G252.93	1.46692e+06	20.4844	16.2376	24.9276
MA.G102.93	NL.1.95	6.78088e+06	22.693	18.3495	26.9746
MA.G102.93	NL.218.95	5.11652e+06	22.2867	18.1908	26.801
MA.G102.93	NL.172.96	678241	19.3714	15.0166	23.6567
MA.G102.93	SI.2.87	206431	17.6553	13.1557	21.7703
MA.G102.93	SH.11.87	1.14171e+06	20.1228	16.0407	24.5077
MA.G102.93	NL.620.89	1.26654e+06	20.2725	16.0592	24.5201
MA.G102.93	BE.353.89	381270	18.5405	14.3275	23.023
MA.G102.93	BE.32A.92	1.21691e+07	23.5367	19.3972	27.8947
MA.G102.93	HK.34.90	2.71311e+06	21.3715	17.0242	25.5135
MA.G102.93	BE.32B.92	7.75608e+06	22.8869	18.5911	27.2888
MA.G102.93	SD.9.93	5.27781e+07	25.6534	21.5715	30.025
MA.G102.93	OS.2352.93	2.96283e+07	24.8205	20.5629	29.1098
MA.G102.93	PR.413.94	1.30521e+06	20.3159	16.0896	24.7297
MA.G102.93	GD.25.93	1.00405e+06	19.9374	15.7832	24.2218
MA.G102.93	JO.33.94	3.54456e+06	21.7572	17.5419	25.9918
MA.G102.93	GE.A9509.95	3.35802e+06	21.6792	17.3503	25.8992
MA.G102.93	FI.338.95	2.90662e+06	21.4709	17.1471	25.713
MA.G102.93	NA.933.95	1.20492e+06	20.2005	15.8893	24.456
MA.G102.93	LY.2279.95	753178	19.5226	15.4154	23.9002
MA.G102.93	SP.1.96	254550	17.9576	13.6591	22.2008
MA.G102.93	BR.8.96	815745	19.6378	15.1784	23.9862
MA.G102.93	AU.10.97	1.96832e+07	24.2305	20.0508	28.472
MA.G102.93	NL.5.98	651540	19.3135	15.0062	23.6018
MA.G252.93	NL.450.88	198046	17.5955	13.0824	21.6841
MA.G252.93	LY.1149.91	268030	18.032	13.8876	22.5245
MA.G252.93	MA.G252.93	1.97874e+07	24.2381	19.794	28.4284
MA.G252.93	NL.1.95	686740	19.3894	15.3449	23.7203
MA.G252.93	NL.218.95	4.44528e+06	22.0838	17.9077	26.5303
MA.G252.93	NL.172.96	2.38889e+06	21.1879	16.9555	25.5338
MA.G252.93	BE.353.89	594222	19.1806	14.8417	23.388
MA.G252.93	BE.32A.92	1.66936e+06	20.6709	16.4445	25.1295
MA.G252.93	HK.34.90	387319	18.5632	14.1789	22.7819
MA.G252.93	SD.9.93	6.15178e+06	22.5526	18.3808	26.8534
MA.G252.93	OS.2352.93	1.95453e+06	20.8984	16.7376	25.308
MA.G252.93	PR.413.94	3.28867e+06	21.6491	17.4879	26.0773
MA.G252.93	GD.25.93	2.43828e+06	21.2174	16.9426	25.5517
MA.G252.93	JO.33.94	2.13169e+06	21.0236	16.6427	25.3097
MA.G252.93	FI.338.95	2.7825e+06	21.408	17.1297	25.6283
MA.G252.93	LY.2279.95	9.42441e+06	23.168	19.0114	27.5891
MA.G252.93	NL.18.94	5.58524e+07	25.7351	21.0756	29.7973
NL.241.93	NL.450.88	213859	17.7063	13.3893	21.9437
NL.241.93	LY.1149.91	480280	18.8735	14.6303	23.0882
NL.241.93	MA.G252.93	8.97999e+06	23.0983	18.6262	27.1906
NL.241.93	NL.1.95	1.78314e+07	24.0879	19.8782	28.3393
NL.241.93	NL.218.95	3.01595e+07	24.8461	20.508	29.2914
NL.241.93	NL.172.96	1.53092e+06	20.546	16.2272	24.8247
NL.241.93	BE.353.89	625931	19.2556	14.9135	23.5524
NL.241.93	BE.32A.92	8.52166e+06	23.0227	18.6846	27.2049
NL.241.93	HK.34.90	2.76855e+06	21.4007	17.1086	25.6409
NL.241.93	BE.32B.92	5.53366e+06	22.3998	18.1048	26.8126
NL.241.93	SD.9.93	5.75222e+07	25.7776	21.6171	30.1327
NL.241.93	OS.2352.93	5.01343e+07	25.5793	21.0598	29.5709
NL.241.93	PR.413.94	1.00374e+07	23.2589	19.0234	27.6182
NL.241.93	GD.25.93	1.08326e+07	23.3689	19.1161	27.6448
NL.241.93	GE.A9509.95	1.62034e+07	23.9498	19.6413	28.1107
NL.241.93	FI.338.95	8.00495e+06	22.9325	18.5353	26.9998
NL.241.93	NA.933.95	1.49995e+06	20.5165	16.231	24.8402
NL.241.93	LY.2279.95	2.03391e+06	20.9558	16.6316	25.2548
NL.241.93	SP.1.96	695214	19.4071	15.0495	23.6162
NL.241.93	BR.8.96	1.87428e+06	20.8379	16.6525	25.2827
NL.241.93	AU.10.97	2.65237e+07	24.6608	20.3771	28.9268
NL.241.93	NL.5.98	894009	19.7699	15.6063	24.0684
NL.1.95	LY.1149.91	669862	19.3535	15.0803	23.7913
NL.1.95	MA.G252.93	8.11318e+06	22.9518	18.7051	27.3171
NL.1.95	NL.1.95	1.80998e+07	24.1095	19.7958	28.3185
NL.1.95	NL.218.95	4.50944e+07	25.4264	21.0694	29.6006
NL.1.95	HK.34.90	2.40527e+06	21.1978	16.7631	25.3507
NL.1.95	SD.9.93	3.22452e+07	24.9426	20.7282	29.3012
NL.1.95	OS.2352.93	3.11561e+07	24.893	20.4132	29.0344
NL.1.95	PR.413.94	6.3857e+06	22.6064	18.2501	26.8994
NL.1.95	GD.25.93	1.07365e+07	23.356	19.242	27.698
NL.1.95	JO.33.94	9.00446e+06	23.1022	18.8522	27.4337
NL.1.95	GE.A9509.95	3.20296e+07	24.9329	20.6192	29.2198
NL.1.95	FI.338.95	9.13243e+06	23.1226	18.6906	27.2684
NL.1.95	NL.47.95	1.71231e+06	20.7075	16.3986	25.0435
NL.1.95	LY.2279.95	3.05241e+06	21.5415	17.4014	25.9353
NL.1.95	BR.8.96	704997	19.4273	15.0793	23.7704
NL.1.95	NL.5.98	507042	18.9517	14.6487	23.1475
NL.1.95	NL.18.94	1.90131e+07	24.1805	19.7086	28.3336
NL.1.95	NL.286.97	228887	17.8043	13.5306	22.154
WE.4.85	VI.3A.75	6.14702e+07	25.8734	21.4889	30.1279
WE.4.85	LE.360.86	5.02729e+06	22.2614	17.85	26.4182
WE.4.85	TE.1A.77	417646	18.6719	14.1368	22.8077
WE.4.85	NL.330.85	3.33682e+06	21.67	17.5744	26.1251
WE.4.85	NL.450.88	3.64494e+06	21.7975	17.4476	26.1076
WE.4.85	BA.1.79	257703	17.9754	13.7008	22.1881
WE.4.85	PH.2.82	1.60326e+09	30.5784	26.3059	35.0899
WE.4.85	CC.4.85	1.82751e+06	20.8014	16.4894	25.0771
WE.4.85	WE.4.85	1.02331e+07	23.2867	19.0215	27.57
WE.4.85	VI.7.87	1.76493e+06	20.7512	16.4642	25.0794
WE.4.85	SI.2.87	1.20775e+06	20.2039	16.047	24.6381
WE.4.85	EN.496.80	1.50235e+06	20.5188	16.3921	25.0575
WE.4.85	NL.333.85	2.60716e+06	21.314	16.9484	25.4259
OK.5.88	TE.1A.77	162389	17.3091	12.7936	21.4411
OK.5.88	NL.330.85	1.34197e+06	20.3559	15.8584	24.3746
OK.5.88	NL.450.88	3.84676e+06	21.8752	17.7123	26.1837
OK.5.88	BA.1.79	153001	17.2232	12.9818	21.502
OK.5.88	PH.2.82	1.97835e+08	27.5597	23.3765	31.9635
OK.5.88	WE.4.85	1.81958e+06	20.7952	16.3621	24.9486
OK.5.88	VI.7.87	5.33013e+06	22.3457	18.0523	26.6057
OK.5.88	SI.2.87	2.40346e+06	21.1967	16.7319	25.3853
OK.5.88	EN.496.80	535590	19.0308	14.5114	23.1557
OK.5.88	CO.2.86	1.85045e+08	27.4633	23.2256	31.7947
OK.5.88	SH.11.87	1.26133e+07	23.5884	19.3468	27.9458
OK.5.88	NL.620.89	1.09863e+07	23.3892	19.1044	27.7262
OK.5.88	GU.54.89	555402	19.0832	14.8025	23.5005
SI.2.87	LE.360.86	704188	19.4256	15.1457	23.6319
SI.2.87	TE.1A.77	177691	17.439	13.0356	21.5962
SI.2.87	NL.330.85	1.72256e+06	20.7161	16.2824	25.0273
SI.2.87	NL.450.88	1.55246e+07	23.8881	19.6959	28.1837
SI.2.87	VI.2.90	230324	17.8133	13.6169	22.2391
SI.2.87	PH.2.82	2.38414e+08	27.8289	23.4137	32.0796
SI.2.87	SI.2.87	1.17352e+07	23.4843	19.3099	27.9583
SI.2.87	TE.1B.77	1.3959e+06	20.4128	16.1997	24.7376
SI.2.87	EN.496.80	229825	17.8102	13.4284	22.0136
SI.2.87	CO.2.86	1.04672e+08	26.6413	22.3685	30.9168
SI.2.87	SH.11.87	6.36902e+07	25.9246	21.6179	30.1151
SI.2.87	NL.620.89	3.13573e+06	21.5804	17.1315	25.7977
SI.2.87	GU.54.89	7.10467e+06	22.7603	18.5853	27.2712
SI.2.87	BE.353.89	1.79042e+06	20.7719	16.5466	25.0373
SI.2.87	PH.2V.82	6.06182e+06	22.5313	18.2688	26.7752
SI.2.87	BE.32V.92	557307	19.0881	14.8134	23.3531
VI.7.87	TE.1A.77	228337	17.8008	13.4089	21.9261
VI.7.87	NL.330.85	1.98681e+06	20.922	16.6305	25.1822
VI.7.87	NL.450.88	5.29966e+06	22.3375	18.1246	26.8338
VI.7.87	BA.1.79	169944	17.3747	13.0513	21.6269
VI.7.87	PH.2.82	2.05327e+08	27.6133	23.2544	31.9771
VI.7.87	WE.4.85	3.75095e+06	21.8388	17.4885	26.1483
VI.7.87	VI.7.87	7.54924e+06	22.8479	18.6715	27.121
VI.7.87	SI.2.87	1.32845e+06	20.3413	15.986	24.6126
VI.7.87	EN.496.80	570493	19.1219	14.8797	23.4968
VI.7.87	SH.11.87	1.40794e+07	23.7471	19.3844	28.0662
AL.4382.82	NL.450.88	6.79211e+06	22.6954	18.5435	27.0314
AL.4382.82	BA.1.79	1.20565e+07	23.5233	19.3267	27.7107
AL.4382.82	PH.2.82	2.74164e+10	34.6743	30.2089	38.801
AL.4382.82	WE.4.85	4.55105e+07	25.4397	21.1637	29.7711
AL.4382.82	TE.1B.77	6.44131e+07	25.9409	21.6982	30.2393
AL.4382.82	BA.2.79	1.89816e+07	24.1781	19.8196	28.3162
AL.4382.82	EN.496.80	4.27642e+07	25.3499	21.0758	29.6234
LY.2380.81	NL.450.88	1.35809e+07	23.6951	19.2898	27.9838
LY.2380.81	BA.1.79	1.217e+07	23.5368	19.2518	27.9284
LY.2380.81	PH.2.82	1.35617e+10	33.6588	29.4263	38.0403
LY.2380.81	WE.4.85	4.52819e+07	25.4324	21.1043	29.7394
LY.2380.81	TE.1B.77	3.24269e+07	24.9507	20.8008	29.2156
LY.2380.81	BA.2.79	1.88731e+07	24.1698	19.9161	28.4343
LY.2380.81	EN.496.80	4.28652e+07	25.3533	20.9077	29.4895
BI.4791.81	TE.1A.77	3.1531e+06	21.5883	17.1238	25.7009
BI.4791.81	NL.450.88	6.063e+06	22.5316	18.1518	26.8674
BI.4791.81	BA.1.79	3.8483e+06	21.8758	17.6969	26.258
BI.4791.81	PH.2.82	4.29498e+09	32	27.6408	36.2983
BI.4791.81	WE.4.85	2.03389e+07	24.2777	20.1702	28.715
BI.4791.81	TE.1B.77	1.45947e+07	23.7989	19.3706	28.0115
BI.4791.81	BA.2.79	8.4733e+06	23.0145	18.8829	27.368
BI.4791.81	EN.496.80	1.33655e+07	23.672	19.2768	27.9097
BI.4791.81	SH.31.80	3.61174e+06	21.7843	17.5024	26.0744
BI.10684.82	TE.1A.77	6.82594e+06	22.7026	18.2642	26.8762
BI.10684.82	NL.450.88	3.2647e+06	21.6385	17.4249	25.9679
BI.10684.82	BA.1.79	4.10968e+06	21.9706	17.6611	26.1021
BI.10684.82	PH.2.82	6.50336e+09	32.5985	28.2481	36.8328
BI.10684.82	WE.4.85	2.17557e+07	24.3749	20.1567	28.7453
BI.10684.82	TE.1B.77	1.54956e+07	23.8854	19.3803	28.0088
BI.10684.82	BA.2.79	6.46639e+06	22.6245	18.1235	26.7961
BI.10684.82	EN.496.80	2.88267e+07	24.7809	20.4177	28.9905
BI.10684.82	SH.31.80	5.80614e+06	22.4691	18.1136	26.7829
OS.13676.83	NL.450.88	7.9489e+06	22.9223	18.6287	27.2275
OS.13676.83	BA.1.79	7.04338e+06	22.7478	18.4471	26.995
OS.13676.83	PH.2.82	1.5918e+10	33.8899	29.5891	38.2166
OS.13676.83	WE.4.85	2.66528e+07	24.6678	20.4228	28.9056
OS.13676.83	TE.1B.77	1.90201e+07	24.181	20.0791	28.4548
OS.13676.83	BA.2.79	1.10907e+07	23.4028	19.1294	27.7681
OS.13676.83	EN.496.80	4.97719e+07	25.5688	21.2873	29.8267
NL.333.85	LE.360.86	1.50355e+06	20.5199	16.3854	24.8974
NL.333.85	TE.1A.77	1.73757e+06	20.7286	16.4887	25.1765
NL.333.85	NL.241.82	2.33151e+07	24.4748	20.1177	28.6445
NL.333.85	NL.450.88	6.62651e+06	22.6598	18.3661	26.8982
NL.333.85	BA.1.79	369580	18.4955	13.9991	22.5572
NL.333.85	PH.2.82	8.24263e+08	29.6185	25.2199	33.7306
NL.333.85	WE.4.85	2.1894e+07	24.384	20.0049	28.6557
NL.333.85	TE.1B.77	7.90173e+06	22.9137	18.5021	27.0668
NL.333.85	NL.333.85	9.2451e+06	23.1403	18.7995	27.3583
NL.333.85	CE.1A.84	2.05839e+09	30.9389	26.8293	35.284
NL.333.85	CE.1B.84	4.60014e+08	28.7771	24.5917	33.1787
BA.1.79	LE.360.86	659786	19.3316	15.1027	23.6862
BA.1.79	TE.1A.77	1.08278e+06	20.0463	15.8511	24.4945
BA.1.79	NL.241.82	1.17423e+08	26.8071	22.4181	31.0818
BA.1.79	NL.330.85	2.67612e+06	21.3517	16.8254	25.41
BA.1.79	NL.450.88	1.03729e+06	19.9844	15.6092	24.1922
BA.1.79	BA.1.79	3.69576e+06	21.8174	17.377	26.0156
BA.1.79	PH.2.82	2.91959e+09	31.4431	27.3234	36.0182
BA.1.79	WE.4.85	5.69091e+06	22.4402	18.0619	26.6401
BA.1.79	SI.2.87	171291	17.3861	12.9722	21.5583
BA.1.79	TE.1B.77	4.97209e+06	22.2454	17.8432	26.4293
BA.1.79	EN.496.80	6.5374e+06	22.6403	18.3617	26.8525
BA.1.79	NL.333.85	1.46424e+06	20.4817	16.3369	24.9731
BA.1.79	CE.1A.84	6.39423e+08	29.2522	25.0093	33.6561
BA.1.79	CE.1B.84	7.19809e+07	26.1011	21.8785	30.3429
BA.1.79	SH.11.87	476852	18.8632	14.2993	23.0321
BA.1.79	PH.2V.82	3.24495e+06	21.6298	17.4121	25.8561
PH.2.82	LE.360.86	1.2712e+06	20.2778	15.924	24.447
PH.2.82	NL.241.82	4.44395e+08	28.7273	24.557	33.0889
PH.2.82	NL.330.85	6.19895e+06	22.5636	18.4408	26.9455
PH.2.82	NL.450.88	1.96324e+06	20.9048	16.7944	25.3625
PH.2.82	WE.4.85	4.73656e+06	22.1754	17.8115	26.4303
PH.2.82	SI.2.87	1.55066e+06	20.5645	16.3282	24.7825
PH.2.82	TE.1B.77	4.70915e+06	22.167	17.9614	26.6065
PH.2.82	EN.496.80	1.87484e+06	20.8383	16.434	24.882
PH.2.82	NL.333.85	5.57576e+06	22.4107	18.2123	26.7806
PH.2.82	CE.1A.84	1.21799e+09	30.1819	25.7546	34.3457
PH.2.82	CE.1B.84	6.9325e+07	26.0469	21.9178	30.3887
PH.2.82	SH.11.87	1.80977e+06	20.7874	16.3432	25.0139
PH.2.82	PH.2V.82	9.65438e+07	26.5247	22.1294	30.7616
CE.1.84	LE.360.86	1.52773e+06	20.543	16.3462	24.752
CE.1.84	TE.1A.77	1.76989e+06	20.7552	16.5847	25.1
CE.1.84	NL.450.88	3.39239e+06	21.6939	17.4794	26.1148
CE.1.84	BA.1.79	380229	18.5365	14.3202	22.9918
CE.1.84	PH.2.82	8.49168e+08	29.6615	25.1887	33.832
CE.1.84	NL.333.85	9.57312e+06	23.1906	18.7579	27.4165
CE.1.84	CE.1A.84	2.1006e+09	30.9682	26.6977	35.1903
CE.1.84	CE.1B.84	9.51396e+08	29.8255	25.6748	34.275
LE.360.86	LE.360.86	3.80087e+06	21.8579	17.4868	25.9605
LE.360.86	TE.1A.77	768639	19.5519	15.2458	23.7631
LE.360.86	NL.241.82	2.96085e+07	24.8195	20.5149	29.0963
LE.360.86	NL.330.85	3.756e+06	21.8408	17.4476	26.1448
LE.360.86	NL.450.88	5.87694e+06	22.4866	18.3525	26.8643
LE.360.86	PH.2.82	2.08462e+09	30.9571	26.6087	35.3095
LE.360.86	WE.4.85	1.95328e+07	24.2194	20.0071	28.5452
LE.360.86	VI.7.87	1.1526e+06	20.1365	15.8558	24.4859
LE.360.86	SI.2.87	493135	18.9116	14.6224	23.1778
LE.360.86	EN.496.80	1.63168e+06	20.6379	16.319	24.7847
LE.360.86	NL.333.85	2.95736e+06	21.4959	17.2475	25.7962
LE.360.86	CE.1A.84	3.20486e+08	28.2557	24.0643	32.659
LE.360.86	CE.1B.84	7.30497e+07	26.1224	21.9551	30.4559
LE.360.86	SH.11.87	7.62272e+06	22.8619	18.5057	26.9834
LE.360.86	GU.54.89	849732	19.6966	15.251	23.749
LE.360.86	PH.2V.82	6.57688e+06	22.649	18.2758	26.976
VI.1.88	TE.1A.77	201857	17.623	13.491	21.9616
VI.1.88	NL.330.85	3.4201e+06	21.7056	17.5152	25.8862
VI.1.88	NL.450.88	6.13684e+06	22.5491	18.139	26.9065
VI.1.88	PH.2.82	3.83419e+08	28.5143	24.2807	32.9793
VI.1.88	WE.4.85	4.0497e+06	21.9494	17.7028	26.2539
VI.1.88	VI.7.87	7.80178e+06	22.8954	18.679	27.1215
VI.1.88	SI.2.87	2.89522e+06	21.4652	17.1261	25.7472
VI.1.88	EN.496.80	1.21572e+06	20.2134	15.8726	24.4558
VI.1.88	CO.2.86	2.08186e+08	27.6333	23.3815	31.9797
VI.1.88	SH.11.87	2.26674e+07	24.4341	20.2183	28.7626
VI.1.88	NL.620.89	1.24239e+07	23.5666	19.3342	27.8396
VI.1.88	GU.54.89	630973	19.2672	15.0649	23.3911
CC.2.88	TE.1A.77	82423.9	16.3308	12.1308	20.6298
CC.2.88	NL.330.85	5.12208e+06	22.2883	17.9319	26.5346
CC.2.88	NL.450.88	4.99855e+06	22.2531	18.1212	26.5779
CC.2.88	PH.2.82	2.48534e+09	31.2108	26.831	35.3494
CC.2.88	WE.4.85	3.34177e+07	24.9941	20.7508	29.3638
CC.2.88	VI.7.87	1.38107e+06	20.3974	16.2754	24.7948
CC.2.88	SI.2.87	206831	17.6581	13.345	21.9537
CC.2.88	EN.496.80	987146	19.9129	15.6264	24.232
ST.12.88	TE.1A.77	177066	17.4339	13.3602	21.7933
ST.12.88	NL.330.85	2.19199e+06	21.0638	16.7891	25.3895
ST.12.88	VI.2.90	6.41002e+06	22.6119	18.3324	26.9283
ST.12.88	BA.1.79	301678	18.2026	13.9514	22.5895
ST.12.88	PH.2.82	1.70046e+08	27.3413	23.112	31.7981
ST.12.88	VI.7.87	4.72736e+06	22.1726	17.9908	26.6377
ST.12.88	SI.2.87	2.28095e+07	24.4431	20.1856	28.6813
ST.12.88	EN.496.80	532267	19.0218	14.7153	23.2548
ST.12.88	CO.2.86	1.46706e+09	30.4503	26.1036	34.6285
ST.12.88	SH.11.87	1.60193e+08	27.2552	22.8117	31.428
ST.12.88	NL.620.89	4.33795e+07	25.3705	21.1204	29.6011
ST.12.88	GU.54.89	7.02735e+07	26.0665	21.6685	30.3097
ST.12.88	BE.353.89	2.02543e+06	20.9498	16.6153	25.1942
EN.138.89	NL.330.85	1.82628e+06	20.8005	16.6939	25.153
EN.138.89	NL.450.88	1.98053e+07	24.2394	20.1649	28.6782
EN.138.89	VI.2.90	3.3876e+06	21.6918	17.2802	25.7732
EN.138.89	WE.4.85	1.35612e+07	23.693	19.4545	27.9964
EN.138.89	VI.7.87	4.47512e+06	22.0935	17.7489	26.4161
EN.138.89	SI.2.87	6.57568e+06	22.6487	18.277	26.943
EN.138.89	CO.2.86	1.90889e+08	27.5082	23.2738	31.8686
EN.138.89	SH.11.87	1.66651e+08	27.3123	23.0043	31.6238
EN.138.89	NL.620.89	4.66397e+07	25.4751	21.2483	29.84
EN.138.89	BE.353.89	2.13076e+06	21.0229	16.7194	25.3348
EI.3447.89	NL.330.85	1.0969e+06	20.065	15.6638	24.2744
EI.3447.89	SI.2.87	1.13877e+07	23.441	19.2587	27.7333
EI.3447.89	CO.2.86	9.1901e+08	29.7755	25.4656	34.0366
EI.3447.89	SH.11.87	1.00228e+08	26.5787	22.0805	30.6999
EI.3447.89	NL.620.89	5.49114e+07	25.7106	21.4681	30.0087
EI.3447.89	GU.54.89	4.3639e+07	25.3791	21.0703	29.6005
EN.427.88	NL.330.85	1.7287e+06	20.7213	16.3622	24.9237
EN.427.88	NL.450.88	1.0765e+07	23.3598	19.2074	27.6631
EN.427.88	WE.4.85	8.9621e+06	23.0954	18.8465	27.2672
EN.427.88	VI.7.87	3.00137e+06	21.5172	17.296	25.8886
EN.427.88	SI.2.87	1.42085e+07	23.7603	19.3493	27.9502
GE.5007.89	NL.330.85	2.67874e+06	21.3531	17.1161	25.653
GE.5007.89	NL.450.88	2.63177e+07	24.6495	20.2015	28.7901
GE.5007.89	WE.4.85	2.1952e+07	24.3878	20.0945	28.5185
GE.5007.89	VI.7.87	6.50995e+06	22.6342	18.46	26.852
GE.5007.89	SI.2.87	1.10923e+07	23.4031	19.2188	27.7033
GE.5007.89	CO.2.86	1.109e+09	30.0466	25.9058	34.4835
GE.5007.89	SH.11.87	1.20778e+08	26.8478	22.6655	31.2685
GE.5007.89	NL.620.89	6.67209e+07	25.9916	21.7473	30.2456
GE.5007.89	GU.54.89	1.06962e+08	26.6725	22.4669	31.0055
WE.3.90	NL.330.85	309353	18.2389	13.9987	22.594
WE.3.90	NL.450.88	3.86128e+06	21.8806	17.4291	26.0092
WE.3.90	VI.2.90	9.26445e+06	23.1433	18.8924	27.3992
WE.3.90	NL.172.96	154914	17.2411	12.9871	21.6261
WE.3.90	WE.4.85	1.62162e+06	20.629	16.3189	24.8605
WE.3.90	VI.7.87	4.26833e+06	22.0252	17.9643	26.4962
WE.3.90	SI.2.87	1.28955e+06	20.2984	15.8617	24.5342
WE.3.90	CO.2.86	2.59993e+08	27.9539	23.8413	32.3151
WE.3.90	SH.11.87	7.08629e+06	22.7566	18.5673	27.2318
WE.3.90	NL.620.89	1.55757e+07	23.8928	19.6992	28.3154
WE.3.90	GU.54.89	3.14175e+06	21.5831	17.2708	25.7457
WE.3.90	BE.353.89	2.89679e+06	21.466	17.1428	25.8309
WE.3.90	SD.9.93	2.24267e+06	21.0968	16.845	25.4584
WE.3.90	JO.33.94	153496	17.2278	12.9421	21.4267
WE.3.90	FI.338.95	283576	18.1134	13.8423	22.4497
WE.3.90	LY.2279.95	359686	18.4564	14.3708	22.8674
WK.1.89	NL.330.85	957967	19.8696	15.7067	24.2083
WK.1.89	NL.450.88	1.19062e+07	23.5052	19.1536	27.7458
WK.1.89	WE.4.85	9.92608e+06	23.2428	18.681	27.3558
WK.1.89	VI.7.87	2.3299e+06	21.1518	16.8744	25.5859
WK.1.89	SI.2.87	3.12285e+06	21.5744	17.2897	25.7532
WK.1.89	CO.2.86	4.01667e+08	28.5814	24.3614	32.8945
WK.1.89	SH.11.87	7.04644e+07	26.0704	21.7453	30.2771
WK.1.89	NL.620.89	4.81562e+07	25.5212	21.1983	29.8468
WK.1.89	GU.54.89	3.86704e+07	25.2047	20.8567	29.5595
AT.3572DASH5.88	NL.330.85	2.50355e+06	21.2555	16.9837	25.5981
AT.3572DASH5.88	NL.450.88	6.25767e+07	25.8991	21.4733	30.0556
AT.3572DASH5.88	WE.4.85	5.22685e+07	25.6394	21.3105	29.8664
AT.3572DASH5.88	VI.7.87	8.65047e+06	23.0443	18.6989	27.2169
AT.3572DASH5.88	SI.2.87	2.06329e+07	24.2984	19.9946	28.5376
AT.3572DASH5.88	CO.2.86	2.1067e+09	30.9723	26.7534	35.4118
AT.3572DASH5.88	SH.11.87	2.28135e+08	27.7653	23.4315	32.1642
AT.3572DASH5.88	NL.620.89	6.27881e+07	25.904	21.793	30.4083
SH.11.87	LE.360.86	346426	18.4022	14.0778	22.756
SH.11.87	NL.330.85	974195	19.8939	15.4065	24.0622
SH.11.87	NL.450.88	1.84225e+07	24.135	19.9083	28.5801
SH.11.87	VI.2.90	896954	19.7747	15.2835	23.9029
SH.11.87	WE.4.85	7.64805e+06	22.8667	18.461	27.0553
SH.11.87	VI.7.87	1.69015e+06	20.6887	16.354	24.939
SH.11.87	SI.2.87	5.70064e+06	22.4427	18.0927	26.6126
SH.11.87	CO.2.86	1.02862e+08	26.6161	22.2172	30.8066
SH.11.87	SH.11.87	2.82675e+07	24.7526	20.5172	29.2136
SH.11.87	NL.620.89	3.0566e+06	21.5435	17.2767	25.8071
SH.11.87	BE.353.89	481228	18.8764	14.4349	22.9896
GU.54.89	LE.360.86	394634	18.5902	14.487	23.083
GU.54.89	NL.330.85	1.1109e+06	20.0833	15.8604	24.4782
GU.54.89	NL.450.88	6.90538e+06	22.7193	18.2886	26.8102
GU.54.89	VI.2.90	1.03011e+06	19.9744	15.6412	24.1915
GU.54.89	WE.4.85	5.74806e+06	22.4546	18.2438	26.8318
GU.54.89	VI.7.87	479196	18.8703	14.5141	23.1176
GU.54.89	SI.2.87	4.02526e+06	21.9407	17.7464	26.339
GU.54.89	TE.1B.77	777457	19.5684	15.3487	23.9589
GU.54.89	CO.2.86	5.8201e+07	25.7945	21.5786	30.1362
GU.54.89	NL.620.89	3.51931e+06	21.7469	17.5496	26.2361
GU.54.89	BE.353.89	651722	19.3139	15.0194	23.5678
GU.54.89	JO.33.94	271675	18.0515	13.6234	22.2821
GU.54.89	BE.32V.92	533220	19.0244	14.6955	23.2573
HK.1.89	NL.330.85	1.37317e+06	20.3891	15.9897	24.5147
HK.1.89	NL.450.88	1.70012e+07	24.0191	19.7771	28.4488
HK.1.89	VI.2.90	2.56013e+06	21.2878	16.9107	25.5294
HK.1.89	WE.4.85	1.41056e+07	23.7498	19.2684	27.8665
HK.1.89	VI.7.87	3.33726e+06	21.6702	17.417	25.9714
HK.1.89	SI.2.87	5.65614e+06	22.4314	18.2372	26.7289
HK.1.89	CO.2.86	5.77255e+08	29.1046	24.6509	33.2504
HK.1.89	SH.11.87	7.25281e+07	26.112	21.9703	30.5845
HK.1.89	NL.620.89	3.95524e+07	25.2373	21.1277	29.637
HK.1.89	GU.54.89	5.59626e+07	25.738	21.3191	29.8733
HK.1.89	BE.353.89	1.60163e+06	20.6111	16.1853	24.828
NL.650.89	NL.330.85	813444	19.6337	15.4621	23.9484
NL.650.89	NL.450.88	5.05928e+06	22.2705	18.03	26.6253
NL.650.89	WE.4.85	6.74551e+06	22.6855	18.2131	26.9937
NL.650.89	VI.7.87	350638	18.4196	14.0975	22.7473
NL.650.89	SI.2.87	3.38798e+06	21.692	17.5756	26.1212
NL.650.89	CO.2.86	8.58461e+07	26.3552	21.9665	30.4925
NL.650.89	SH.11.87	7.53033e+07	26.1662	21.9385	30.5119
NL.650.89	NL.620.89	2.05547e+07	24.293	20.0311	28.5827
NL.650.89	GU.54.89	6.62042e+07	25.9804	21.6692	30.2658
NL.738.89	NL.330.85	788008	19.5879	15.1056	23.7699
NL.738.89	NL.450.88	6.95614e+06	22.7299	18.3468	26.8146
NL.738.89	WE.4.85	5.77927e+06	22.4625	18.2693	26.8441
NL.738.89	VI.7.87	168394	17.3615	12.9444	21.5
NL.738.89	SI.2.87	2.30088e+06	21.1338	16.6891	25.1307
NL.738.89	CO.2.86	9.19709e+07	26.4547	22.0835	30.8435
NL.738.89	SH.11.87	1.01961e+08	26.6034	22.376	31.0068
NL.738.89	NL.620.89	2.81331e+07	24.7458	20.6325	29.3359
NL.738.89	GU.54.89	2.24829e+07	24.4223	20.1189	28.6906
SP.35.89	NL.330.85	1.1473e+06	20.1298	15.9065	24.4102
SP.35.89	NL.450.88	1.24591e+07	23.5707	19.5078	27.9696
SP.35.89	VI.2.90	4.26016e+06	22.0225	17.8439	26.314
SP.35.89	WE.4.85	1.18602e+07	23.4996	19.2024	27.6391
SP.35.89	VI.7.87	2.80368e+06	21.4189	17.2026	25.6413
SP.35.89	SI.2.87	4.09886e+06	21.9668	17.7476	26.3448
SP.35.89	CO.2.86	8.41785e+08	29.6489	25.4695	34.0318
SP.35.89	SH.11.87	5.2158e+07	25.6364	21.4049	29.8956
SP.35.89	NL.620.89	5.72561e+07	25.7709	21.3724	30.0774
SP.35.89	GU.54.89	4.64815e+07	25.4702	21.2075	29.7052
SP.35.89	BE.353.89	2.69289e+06	21.3607	17.2505	25.849
SP.40.89	NL.330.85	1.05143e+06	20.0039	15.8153	24.3445
SP.40.89	NL.450.88	6.52467e+06	22.6375	18.3988	26.9541
SP.40.89	WE.4.85	3.43074e+06	21.7101	17.4948	26.1342
SP.40.89	VI.7.87	1.02859e+07	23.2942	19.232	27.6368
SP.40.89	SI.2.87	2.17411e+06	21.052	16.7657	25.1804
SP.40.89	CO.2.86	2.78659e+08	28.0539	23.9112	32.4336
SP.40.89	SH.11.87	4.8108e+07	25.5198	21.3543	29.8773
SP.40.89	NL.620.89	3.31825e+07	24.9839	20.6572	29.2762
SP.40.89	GU.54.89	2.13813e+07	24.3498	19.9761	28.5338
WE.5.89	NL.450.88	9.83067e+06	23.2289	18.9444	27.4248
WE.5.89	WE.4.85	3.24906e+06	21.6316	17.0167	25.6087
WE.5.89	VI.7.87	1.92268e+06	20.8747	16.5003	25.1742
WE.5.89	CO.2.86	1.31035e+08	26.9654	22.6785	31.221
WE.5.89	SH.11.87	4.56918e+07	25.4454	21.1248	29.6356
WE.5.89	NL.620.89	1.24636e+07	23.5712	19.4624	27.9656
WE.5.89	GU.54.89	7.94653e+06	22.9219	18.5216	27.1362
ME.2.90	NL.330.85	1.15155e+06	20.1351	15.7173	24.2715
ME.2.90	NL.450.88	2.91883e+07	24.7989	20.6928	29.1192
ME.2.90	VI.2.90	2.14626e+06	21.0334	16.8362	25.4179
ME.2.90	WE.4.85	1.20554e+07	23.5232	19.2785	27.807
ME.2.90	VI.7.87	5.63542e+06	22.4261	18.4297	27.0287
ME.2.90	SH.11.87	2.1366e+08	27.6707	23.4275	32.1138
ME.2.90	NL.620.89	5.86491e+07	25.8056	21.3825	30.0451
ME.2.90	GU.54.89	9.45017e+07	26.4938	22.2987	30.8346
ME.2.90	BE.353.89	1.35414e+06	20.3689	15.9569	24.5219
SU.1.90	NL.330.85	1.44952e+06	20.4671	16.373	24.9111
SU.1.90	NL.450.88	1.80209e+07	24.1032	19.7398	28.4038
SU.1.90	WE.4.85	1.50268e+07	23.841	19.6028	28.1402
SU.1.90	VI.7.87	4.98626e+06	22.2495	17.8746	26.5314
SU.1.90	SI.2.87	5.9667e+06	22.5085	18.0092	26.632
SU.1.90	CO.2.86	6.02399e+08	29.1661	24.9178	33.49
SU.1.90	SH.11.87	6.63675e+07	25.984	21.5721	30.0965
SU.1.90	NL.620.89	3.63732e+07	25.1164	20.7295	29.2827
SU.1.90	GU.54.89	5.87533e+07	25.8082	21.6777	30.3162
VI.33.92	NL.450.88	2.91021e+06	21.4727	17.3731	25.9876
VI.33.92	VI.2.90	9.80671e+06	23.2253	19.1605	27.7721
VI.33.92	NL.172.96	45997.3	15.4893	11.2744	19.8177
VI.33.92	WE.4.85	1.72098e+06	20.7148	16.3725	24.8321
VI.33.92	SI.2.87	966753	19.8828	15.671	24.3089
VI.33.92	CO.2.86	2.75541e+08	28.0377	23.8768	32.4392
VI.33.92	SH.11.87	3.77335e+06	21.8474	17.555	26.1001
VI.33.92	NL.620.89	1.17076e+07	23.4809	19.2896	27.9545
VI.33.92	BE.353.89	8.76514e+06	23.0633	18.5714	27.1187
VI.33.92	SD.9.93	683635	19.3829	15.1533	23.7156
VI.33.92	JO.33.94	120899	16.8834	12.628	21.0905
VI.33.92	FI.338.95	74962.5	16.1939	11.8966	20.4553
VI.33.92	LY.2279.95	76594.3	16.2249	11.9585	20.4377
NL.891.91	NL.450.88	2.48155e+06	21.2428	16.8768	25.6424
NL.891.91	VI.2.90	1.16883e+07	23.4786	19.2496	27.8649
NL.891.91	NL.172.96	83220.7	16.3447	12.0731	20.5995
NL.891.91	WE.4.85	2.06491e+06	20.9777	16.7236	25.2304
NL.891.91	SI.2.87	579387	19.1442	14.8407	23.4427
NL.891.91	CO.2.86	1.65811e+08	27.305	22.9232	31.4703
NL.891.91	SH.11.87	2.2623e+06	21.1094	16.7831	25.4759
NL.891.91	NL.620.89	1.41069e+07	23.7499	19.6579	28.1359
NL.891.91	BE.353.89	7.5349e+06	22.8452	18.2972	26.8164
NL.891.91	SD.9.93	823803	19.6519	15.4027	23.8955
NL.891.91	JO.33.94	97344.9	16.5708	12.1882	20.7921
NL.891.91	FI.338.95	181346	17.4684	13.1989	21.7296
NL.891.91	LY.2279.95	55691.4	15.7652	11.5175	20.0076
CA.1.91	NL.450.88	4.68937e+07	25.4829	21.1925	29.6885
CA.1.91	VI.2.90	4.90918e+06	22.2271	18.0711	26.6209
CA.1.91	WE.4.85	3.93263e+07	25.229	20.8407	29.494
CA.1.91	SI.2.87	1.10621e+07	23.3991	19.2693	27.8225
CA.1.91	CO.2.86	1.59978e+09	30.5752	26.4589	34.9436
CA.1.91	SH.11.87	1.7213e+08	27.3589	22.8532	31.5281
CA.1.91	NL.620.89	6.68881e+07	25.9952	21.5309	30.2149
CA.1.91	BE.353.89	4.41439e+06	22.0738	17.5775	26.2842
EN.260.91	NL.450.88	3.43055e+06	21.71	17.2838	25.9364
EN.260.91	VI.2.90	1.63725e+07	23.9648	19.5542	28.3034
EN.260.91	NL.172.96	114467	16.8046	12.4875	21.0258
EN.260.91	WE.4.85	2.87027e+06	21.4528	17.3844	25.8006
EN.260.91	SI.2.87	809540	19.6267	15.4376	23.966
EN.260.91	CO.2.86	4.63983e+08	28.7895	24.3629	33.1226
EN.260.91	SH.11.87	3.14494e+06	21.5846	17.3558	25.8208
EN.260.91	NL.620.89	1.94225e+07	24.2112	19.9793	28.622
EN.260.91	BE.353.89	1.03204e+07	23.299	19.1271	27.7396
EN.260.91	SD.9.93	1.15068e+06	20.1341	15.9214	24.435
EN.260.91	FI.338.95	126430	16.948	12.6747	21.3093
EN.260.91	LY.2279.95	116048	16.8244	12.4329	21.0542
EN.261.91	NL.450.88	1.49779e+06	20.5144	16.2042	24.7526
EN.261.91	VI.2.90	5.59394e+06	22.4154	18.2271	26.7194
EN.261.91	NL.172.96	166314	17.3435	12.9564	21.6344
EN.261.91	WE.4.85	982766	19.9065	15.617	24.1495
EN.261.91	SI.2.87	246827	17.9131	13.6004	22.2537
EN.261.91	CO.2.86	1.25462e+08	26.9027	22.6684	31.3159
EN.261.91	SH.11.87	1.72194e+06	20.7156	16.5448	25.1587
EN.261.91	NL.620.89	7.56276e+06	22.8505	18.3894	27.1076
EN.261.91	BE.353.89	4.42274e+06	22.0765	17.926	26.6035
EN.261.91	SD.9.93	3.97759e+06	21.9235	17.6709	26.2895
EN.261.91	JO.33.94	703149	19.4235	15.1161	23.6646
EN.261.91	FI.338.95	757462	19.5308	15.3416	23.9027
EN.261.91	LY.2279.95	666190	19.3456	14.9981	23.4748
MA.G12.91	NL.450.88	1.52405e+06	20.5395	16.2998	24.7848
MA.G12.91	VI.2.90	1.14559e+07	23.4496	19.0193	27.5799
MA.G12.91	NL.172.96	53241.9	15.7003	11.3921	20.0069
MA.G12.91	WE.4.85	2.0099e+06	20.9387	16.538	25.0789
MA.G12.91	SI.2.87	799948	19.6095	15.5188	24.0147
MA.G12.91	CO.2.86	1.62468e+08	27.2756	23.0071	31.6523
MA.G12.91	SH.11.87	2.22434e+06	21.0849	16.7204	25.2589
MA.G12.91	NL.620.89	1.5478e+07	23.8837	19.6092	28.2083
MA.G12.91	BE.353.89	7.21836e+06	22.7832	18.5699	27.1196
MA.G12.91	SD.9.93	799780	19.6092	15.0668	23.6601
MA.G12.91	FI.338.95	176162	17.4265	13.0371	21.6053
MA.G12.91	LY.2279.95	45103.9	15.461	11.2146	19.6493
NL.816.91	NL.450.88	6.76522e+06	22.6897	18.1931	26.8927
NL.816.91	VI.2.90	1.58783e+07	23.9206	19.479	28.1998
NL.816.91	NL.172.96	74866.1	16.192	11.9097	20.4863
NL.816.91	WE.4.85	2.80889e+06	21.4216	17.1184	25.6901
NL.816.91	SI.2.87	556922	19.0871	14.8316	23.5703
NL.816.91	CO.2.86	2.26033e+08	27.752	23.5784	32.1468
NL.816.91	SH.11.87	1.54555e+06	20.5597	16.2673	24.9505
NL.816.91	NL.620.89	1.35244e+07	23.6891	19.5688	28.074
NL.816.91	BE.353.89	1.01023e+07	23.2682	19.0747	27.5808
NL.816.91	SD.9.93	1.12014e+06	20.0952	15.9201	24.436
NL.816.91	FI.338.95	244937	17.9021	13.7835	22.2726
AM.4112.92	NL.450.88	6.05924e+06	22.5307	18.1592	26.7581
AM.4112.92	VI.2.90	1.43677e+07	23.7763	19.7371	28.2376
AM.4112.92	NL.172.96	137254	17.0665	12.7519	21.2337
AM.4112.92	WE.4.85	2.54315e+06	21.2782	16.9857	25.5356
AM.4112.92	SI.2.87	505077	18.9461	14.4466	23.0575
AM.4112.92	CO.2.86	4.13617e+08	28.6237	24.2983	32.917
AM.4112.92	SH.11.87	2.79152e+06	21.4126	17.162	25.7832
AM.4112.92	NL.620.89	2.46514e+07	24.5552	20.3063	28.7743
AM.4112.92	BE.353.89	9.21532e+06	23.1356	18.8711	27.4052
AM.4112.92	SD.9.93	1.52355e+06	20.539	16.2536	24.8254
AM.4112.92	JO.33.94	120517	16.8789	12.5598	21.0211
AM.4112.92	FI.338.95	224642	17.7773	13.3302	21.877
AM.4112.92	LY.2279.95	114364	16.8033	12.5196	21.151
ES.1285.92	NL.450.88	2.22959e+06	21.0883	16.757	25.4031
ES.1285.92	VI.2.90	2.11806e+07	24.3362	20.156	28.6691
ES.1285.92	NL.172.96	148271	17.1779	13.0543	21.6825
ES.1285.92	WE.4.85	1.86031e+06	20.8271	16.7257	25.2514
ES.1285.92	SI.2.87	736872	19.4911	15.1358	23.8541
ES.1285.92	CO.2.86	2.97173e+08	28.1467	23.9804	32.4433
ES.1285.92	SH.11.87	4.09889e+06	21.9668	17.8372	26.4435
ES.1285.92	NL.620.89	3.59418e+07	25.0992	20.9128	29.4973
ES.1285.92	BE.353.89	6.64326e+06	22.6635	18.2287	26.7721
ES.1285.92	SD.9.93	1.28237e+06	20.2904	16.0272	24.6108
ES.1285.92	FI.338.95	244386	17.8988	13.6763	22.1777
ES.1285.92	LY.2279.95	82764.7	16.3367	12.0638	20.6632
FI.220.92	NL.450.88	714210	19.446	15.2349	23.8128
FI.220.92	VI.2.90	3.40232e+06	21.6981	17.3459	25.9086
FI.220.92	NL.172.96	63720.6	15.9595	11.7343	20.2471
FI.220.92	WE.4.85	298749	18.1886	13.9505	22.5178
FI.220.92	SI.2.87	474751	18.8568	14.3663	23.0052
FI.220.92	CO.2.86	4.8642e+07	25.5357	21.3445	29.757
FI.220.92	SH.11.87	1.32046e+06	20.3326	16.0922	24.7202
FI.220.92	NL.620.89	2.89539e+06	21.4653	17.4213	25.9629
FI.220.92	BE.353.89	2.69644e+06	21.3626	17.2045	25.8389
FI.220.92	SD.9.93	952623	19.8615	15.6544	24.1884
FI.220.92	JO.33.94	112461	16.7791	12.6381	21.111
FI.220.92	FI.338.95	208564	17.6701	13.3198	21.8913
FI.220.92	LY.2279.95	64683.8	15.9811	11.603	20.2125
MA.G58.92	NL.450.88	2.82649e+06	21.4306	17.1628	25.6941
MA.G58.92	VI.2.90	6.68432e+06	22.6723	18.3383	26.7726
MA.G58.92	NL.172.96	124094	16.9211	12.4835	21.0418
MA.G58.92	WE.4.85	1.16767e+06	20.1552	15.8766	24.4339
MA.G58.92	SI.2.87	466086	18.8302	14.5721	23.1638
MA.G58.92	CO.2.86	3.79498e+08	28.4995	24.0623	32.6405
MA.G58.92	SH.11.87	2.59684e+06	21.3083	17.0892	25.6679
MA.G58.92	NL.620.89	1.13334e+07	23.4341	19.2212	27.9289
MA.G58.92	BE.353.89	4.2034e+06	22.0031	17.805	26.6293
MA.G58.92	SD.9.93	1.86987e+06	20.8345	16.7073	25.267
MA.G58.92	JO.33.94	222316	17.7623	13.1688	21.9527
MA.G58.92	FI.338.95	207174	17.6605	13.3558	21.9676
MA.G58.92	NA.933.95	307095	18.2283	14.0144	22.6127
MA.G58.92	LY.2279.95	105555	16.6876	12.325	21.0013
NI.3129.92	NL.450.88	2.3814e+06	21.1834	16.6879	25.3012
NI.3129.92	VI.2.90	1.13242e+07	23.4329	19.1518	27.7033
NI.3129.92	NL.172.96	52960.9	15.6926	11.6187	20.2486
NI.3129.92	WE.4.85	1.98282e+06	20.9191	16.4572	25.0049
NI.3129.92	SI.2.87	395213	18.5923	14.0641	22.8823
NI.3129.92	CO.2.86	1.59655e+08	27.2504	22.7883	31.33
NI.3129.92	SH.11.87	2.18883e+06	21.0617	16.7534	25.1791
NI.3129.92	NL.620.89	9.70949e+06	23.211	18.8647	27.5831
NI.3129.92	BE.353.89	7.11959e+06	22.7634	18.504	27.0604
NI.3129.92	SD.9.93	787803	19.5875	15.3797	23.7938
NI.3129.92	JO.33.94	94268.1	16.5245	12.2773	20.7868
NI.3129.92	FI.338.95	172489	17.3961	12.8315	21.4791
NI.3129.92	LY.2279.95	44621.9	15.4455	10.8667	19.4832
NL.819.92	NL.450.88	2.53059e+06	21.271	16.9061	25.5823
NL.819.92	VI.2.90	6.03902e+06	22.5259	18.2601	26.908
NL.819.92	NL.172.96	167389	17.3528	12.9996	21.5958
NL.819.92	WE.4.85	2.10598e+06	21.0061	16.856	25.4255
NL.819.92	SI.2.87	417739	18.6722	14.3495	22.7672
NL.819.92	CO.2.86	1.6942e+08	27.336	23.0765	31.4222
NL.819.92	SH.11.87	1.16342e+06	20.1499	15.9057	24.5434
NL.819.92	NL.620.89	1.01653e+07	23.2772	19.0083	27.5935
NL.819.92	BE.353.89	7.59345e+06	22.8563	18.5364	27.0256
NL.819.92	SD.9.93	1.25183e+06	20.2556	15.8502	24.3539
NL.819.92	JO.33.94	74424.9	16.1835	11.8026	20.4567
NL.819.92	NA.933.95	274639	18.0672	13.9582	22.5287
NL.819.92	LY.2279.95	94567.6	16.5291	12.0181	20.5269
NL.935.92	NL.450.88	5.55296e+06	22.4048	18.1635	26.7564
NL.935.92	VI.2.90	2.67468e+07	24.6729	20.3051	28.8857
NL.935.92	NL.172.96	124771	16.9289	12.5905	21.2706
NL.935.92	WE.4.85	2.33605e+06	21.1556	17.0371	25.5571
NL.935.92	SI.2.87	463046	18.8208	14.5072	23.0241
NL.935.92	CO.2.86	3.80911e+08	28.5049	24.3913	33.0903
NL.935.92	SH.11.87	5.15647e+06	22.298	18.1547	26.704
NL.935.92	NL.620.89	2.26931e+07	24.4358	20.0463	28.6413
NL.935.92	BE.353.89	1.69312e+07	24.0132	19.8839	28.3748
NL.935.92	SD.9.93	941727	19.845	15.5202	23.9204
NL.935.92	JO.33.94	82686.8	16.3354	11.9537	20.5501
NL.935.92	FI.338.95	204394	17.641	13.372	21.9925
NL.935.92	LY.2279.95	157951	17.2691	12.9108	21.5364
PA.583.92	NL.450.88	1.67105e+06	20.6723	16.2933	24.9544
PA.583.92	VI.2.90	1.27517e+07	23.6042	19.3419	27.9312
PA.583.92	NL.172.96	59444.4	15.8593	11.4971	20.0172
PA.583.92	WE.4.85	1.4131e+06	20.4304	16.1724	24.7512
PA.583.92	SI.2.87	277156	18.0803	13.9886	22.4881
PA.583.92	CO.2.86	1.13051e+08	26.7524	22.3211	30.9539
PA.583.92	SH.11.87	1.5435e+06	20.5578	16.3056	24.9286
PA.583.92	NL.620.89	1.0813e+07	23.3663	19.0697	27.6621
PA.583.92	BE.353.89	4.97746e+06	22.247	18.0088	26.4984
PA.583.92	SD.9.93	444880	18.7631	14.7352	23.2484
PA.583.92	FI.338.95	121892	16.8952	12.5556	21.1616
PA.614.92	NL.450.88	1.87173e+06	20.8359	16.5184	25.2098
PA.614.92	VI.2.90	4.48026e+06	22.0951	17.7665	26.3612
PA.614.92	NL.172.96	84086.6	16.3596	12.3441	20.9705
PA.614.92	WE.4.85	1.57306e+06	20.5851	16.2613	24.7852
PA.614.92	SI.2.87	313317	18.2573	14.1996	22.6699
PA.614.92	CO.2.86	1.25856e+08	26.9072	22.5843	31.0932
PA.614.92	SH.11.87	1.73407e+06	20.7257	16.4236	25.0215
PA.614.92	NL.620.89	7.63201e+06	22.8636	18.2468	26.9458
PA.614.92	BE.353.89	2.8012e+06	21.4176	17.1796	25.7878
PA.614.92	SD.9.93	630893	19.267	14.7402	23.3738
PA.614.92	FI.338.95	61761.9	15.9144	11.7733	20.3695
PA.614.92	NA.933.95	112841	16.7839	12.5162	21.2173
SA.8.92	NL.450.88	759820	19.5353	15.3008	23.8431
SA.8.92	VI.2.90	3.59596e+06	21.7779	17.3016	25.9195
SA.8.92	NL.172.96	47847.7	15.5462	11.112	19.9172
SA.8.92	WE.4.85	317405	18.276	13.8133	22.3735
SA.8.92	SI.2.87	253965	17.9543	13.701	22.2696
SA.8.92	CO.2.86	7.20334e+07	26.1022	21.7763	30.4161
SA.8.92	SH.11.87	1.40329e+06	20.4204	16.2043	24.7046
SA.8.92	NL.620.89	3.06363e+06	21.5468	17.1609	25.8422
SA.8.92	BE.353.89	2.26485e+06	21.111	16.8068	25.3189
SA.8.92	SD.9.93	357554	18.4478	14.176	22.7346
SA.8.92	FI.338.95	155814	17.2495	12.9555	21.5962
SA.8.92	LY.2279.95	40102.9	15.2914	11.3173	19.7528
SA.23.92	NL.450.88	1.64822e+06	20.6525	16.491	25.1009
SA.23.92	VI.2.90	7.83645e+06	22.9018	18.2864	26.9363
SA.23.92	NL.172.96	73268.7	16.1609	11.8235	20.3871
SA.23.92	WE.4.85	692155	19.4007	15.209	23.7092
SA.23.92	SI.2.87	1.09343e+06	20.0604	15.8071	24.426
SA.23.92	CO.2.86	1.11479e+08	26.7322	22.2666	30.8624
SA.23.92	SH.11.87	3.02126e+06	21.5267	17.0643	25.6955
SA.23.92	NL.620.89	3.31319e+06	21.6598	17.4231	25.8803
SA.23.92	BE.353.89	4.89808e+06	22.2238	17.8798	26.574
SA.23.92	SD.9.93	276786	18.0784	13.6264	22.2112
SA.23.92	FI.338.95	120822	16.8825	12.5466	21.1745
SA.27.92	NL.450.88	734799	19.487	15.3776	24.0015
SA.27.92	VI.2.90	3.5146e+06	21.7449	17.4385	26.0565
SA.27.92	NL.172.96	132362	17.0141	12.7165	21.2462
SA.27.92	WE.4.85	617847	19.2369	14.883	23.5668
SA.27.92	SI.2.87	491665	18.9073	14.5688	23.1402
SA.27.92	CO.2.86	4.98469e+07	25.571	21.4608	29.9724
SA.27.92	SH.11.87	1.35947e+06	20.3746	16.0723	24.5426
SA.27.92	NL.620.89	2.98898e+06	21.5112	17.3702	26.0288
SA.27.92	BE.353.89	4.44635e+06	22.0842	17.7762	26.2507
SA.27.92	SD.9.93	490626	18.9043	14.565	23.086
SA.27.92	JO.33.94	116663	16.832	12.6963	21.2744
SA.27.92	FI.338.95	215644	17.7183	13.5813	21.9322
SA.27.92	LY.2279.95	221935	17.7598	13.7019	22.1826
ST.7.92	NL.450.88	1.85793e+06	20.8253	16.7436	25.3519
ST.7.92	VI.2.90	8.87441e+06	23.0812	18.9019	27.4368
ST.7.92	WE.4.85	1.54742e+06	20.5614	16.3111	24.8419
ST.7.92	SI.2.87	622566	19.2479	14.8783	23.5944
ST.7.92	CO.2.86	2.49208e+08	27.8928	23.5238	32.1027
ST.7.92	SH.11.87	3.43448e+06	21.7117	17.3392	25.9212
ST.7.92	NL.620.89	3.01985e+07	24.848	20.3686	29.0665
ST.7.92	BE.353.89	5.60484e+06	22.4182	18.1894	26.7918
ST.7.92	SD.9.93	623028	19.2489	15.0205	23.5804
VI.68.92	NL.450.88	3.7477e+06	21.8376	17.4741	26.059
VI.68.92	VI.2.90	3.54725e+07	25.0802	20.7503	29.3311
VI.68.92	WE.4.85	6.25864e+06	22.5774	18.1545	26.7603
VI.68.92	SI.2.87	2.46605e+06	21.2338	16.974	25.513
VI.68.92	CO.2.86	2.50353e+08	27.8994	23.5684	32.0988
VI.68.92	SH.11.87	1.37048e+07	23.7082	19.6487	28.1218
VI.68.92	NL.620.89	7.60425e+06	22.8584	18.4434	26.8986
VI.68.92	BE.353.89	4.49849e+07	25.4229	21.2068	29.763
GE.5366.91	NL.450.88	9.88124e+06	23.2363	18.9623	27.6278
GE.5366.91	VI.2.90	1.46863e+06	20.486	16.187	24.801
GE.5366.91	WE.4.85	8.20335e+06	22.9678	18.7152	27.2263
GE.5366.91	SI.2.87	3.28582e+06	21.6478	17.3597	25.9575
GE.5366.91	CO.2.86	6.64809e+08	29.3084	25.0885	33.6807
GE.5366.91	SH.11.87	7.29278e+07	26.12	21.9149	30.6202
GE.5366.91	NL.620.89	1.99269e+07	24.2482	20.0946	28.5633
GE.5366.91	BE.353.89	1.84257e+06	20.8133	16.4381	25.0418
BE.353.89	LE.360.86	323837	18.3049	14.1389	22.7163
BE.353.89	ST.10.85	707952	19.4333	14.9943	23.5532
BE.353.89	NL.450.88	1.43171e+06	20.4493	16.1117	24.7054
BE.353.89	VI.2.90	3.40492e+06	21.6992	17.2857	25.8758
BE.353.89	LY.1149.91	3.86923e+06	21.8836	17.55	26.0671
BE.353.89	WE.4.85	1.68228e+06	20.682	16.4951	25.1882
BE.353.89	VI.7.87	2.38372e+06	21.1848	16.8216	25.4591
BE.353.89	SI.2.87	711264	19.44	15.0803	23.6738
BE.353.89	BA.2.79	126238	16.9458	12.6611	21.1725
BE.353.89	CO.2.86	9.67644e+07	26.528	22.2116	30.8592
BE.353.89	SH.11.87	2.30246e+06	21.1347	16.7983	25.4536
BE.353.89	NL.620.89	5.8053e+06	22.4689	18.1611	26.8132
BE.353.89	GU.54.89	586830	19.1626	14.8488	23.3386
BE.353.89	BE.353.89	9.98166e+06	23.2508	19.172	27.6855
BE.353.89	BE.32A.92	312643	18.2542	13.9491	22.4068
BE.353.89	HK.34.90	1.58589e+06	20.5969	16.2233	24.9087
BE.353.89	BE.32B.92	1.54565e+06	20.5598	16.3384	24.8728
BE.353.89	BE.32V.92	228858	17.8041	13.7022	22.2744
LY.1182.91	NL.450.88	1.94966e+06	20.8948	16.6471	25.0404
LY.1182.91	VI.2.90	9.29587e+06	23.1482	18.7849	27.2749
LY.1182.91	LY.1149.91	2.88807e+07	24.7836	20.599	29.1662
LY.1182.91	NL.172.96	347281	18.4057	14.2929	22.7945
LY.1182.91	WE.4.85	1.61729e+06	20.6251	16.3979	24.8575
LY.1182.91	SI.2.87	539910	19.0424	14.7887	23.2775
LY.1182.91	CO.2.86	1.31426e+08	26.9697	22.5562	31.1424
LY.1182.91	SH.11.87	1.48908e+06	20.506	16.0579	24.7022
LY.1182.91	NL.620.89	7.79528e+06	22.8942	18.5852	27.0241
LY.1182.91	BE.353.89	9.70238e+06	23.2099	18.8248	27.5047
LY.1182.91	BE.32A.92	601076	19.1972	14.7297	23.326
LY.1182.91	SD.9.93	2.5901e+06	21.3046	16.8465	25.3807
LY.1182.91	JO.33.94	306433	18.2252	13.8052	22.4309
LY.1182.91	FI.338.95	358563	18.4519	14.2528	22.8131
LY.1182.91	NA.933.95	467025	18.8331	14.3947	23.1119
LY.1182.91	LY.2279.95	144329	17.139	12.8624	21.3907
BE.352.89	NL.450.88	1.30736e+06	20.3182	16.2813	24.7164
BE.352.89	VI.2.90	2.32419e+06	21.1483	16.8748	25.5231
BE.352.89	LY.1149.91	9.94642e+06	23.2457	19.0232	27.5987
BE.352.89	MA.G252.93	611732	19.2225	14.9311	23.4399
BE.352.89	NL.172.96	58607.8	15.8388	11.4115	19.854
BE.352.89	WE.4.85	1.10044e+06	20.0696	15.6417	24.318
BE.352.89	SI.2.87	656076	19.3235	14.8824	23.5403
BE.352.89	CO.2.86	1.3375e+08	26.995	22.8089	31.3134
BE.352.89	SH.11.87	3.62344e+06	21.7889	17.1943	25.8994
BE.352.89	NL.620.89	5.32377e+06	22.344	17.9745	26.5852
BE.352.89	BE.353.89	1.43857e+07	23.7781	19.6322	28.2007
BE.352.89	BE.32A.92	816280	19.6387	15.5436	24.189
BE.352.89	HK.34.90	4.08968e+06	21.9636	17.6984	26.2743
BE.352.89	BE.32B.92	2.12117e+06	21.0164	16.8557	25.3115
BE.352.89	SD.9.93	1.74578e+06	20.7354	16.4452	24.9964
BE.352.89	JO.33.94	310056	18.2422	13.8978	22.4799
BE.352.89	FI.338.95	384806	18.5538	14.244	22.8018
BE.352.89	LY.2279.95	341894	18.3832	13.8811	22.5896
PA.467.92	NL.450.88	2.99323e+06	21.5133	17.3643	25.8575
PA.467.92	VI.2.90	1.00004e+07	23.2535	19.1647	27.7604
PA.467.92	NL.172.96	47237.8	15.5277	11.3096	19.9407
PA.467.92	WE.4.85	3.48698e+06	21.7335	17.4919	26.0368
PA.467.92	SI.2.87	492392	18.9094	14.5678	23.1945
PA.467.92	CO.2.86	2.83683e+08	28.0797	23.8116	32.485
PA.467.92	SH.11.87	1.36545e+06	20.3809	16.1254	24.8029
PA.467.92	NL.620.89	1.69375e+07	24.0137	19.6126	28.1243
PA.467.92	BE.353.89	6.26231e+06	22.5783	18.3622	26.8594
PA.467.92	SD.9.93	526549	19.0062	14.7275	23.1732
PA.467.92	FI.338.95	76302	16.2194	12.0805	20.6554
PA.467.92	LY.2279.95	47380.4	15.532	11.0646	19.6061
TI.5957.92	NL.450.88	2.38794e+06	21.1873	16.8066	25.4324
TI.5957.92	VI.2.90	1.14536e+07	23.4493	18.9688	27.5012
TI.5957.92	NL.172.96	80837.8	16.3027	12.1114	20.6669
TI.5957.92	WE.4.85	2.00455e+06	20.9348	16.7089	25.4007
TI.5957.92	SI.2.87	560506	19.0964	14.8734	23.392
TI.5957.92	CO.2.86	2.26419e+08	27.7544	23.5693	32.0245
TI.5957.92	SH.11.87	2.21918e+06	21.0816	16.9132	25.5878
TI.5957.92	NL.620.89	1.38745e+07	23.7259	19.4919	28.1136
TI.5957.92	BE.353.89	7.17936e+06	22.7754	18.6084	27.1581
TI.5957.92	SD.9.93	799840	19.6094	15.1994	23.8123
TI.5957.92	JO.33.94	70512.6	16.1056	11.9479	20.4632
TI.5957.92	FI.338.95	154239	17.2348	12.98	21.4814
TI.5957.92	NA.933.95	144525	17.141	12.8624	21.4497
TI.5957.92	LY.2279.95	44655.9	15.4466	11.3136	19.9045
AT.211.89	NL.330.85	861253	19.7161	15.5137	23.9988
AT.211.89	NL.450.88	1.06977e+07	23.3508	18.8827	27.4628
AT.211.89	WE.4.85	8.79606e+06	23.0684	18.6953	27.2848
AT.211.89	VI.7.87	1.17928e+07	23.4914	19.2066	27.8491
AT.211.89	SI.2.87	1.78581e+06	20.7681	16.537	25.0685
AT.211.89	CO.2.86	3.60488e+08	28.4254	24.0157	32.6018
AT.211.89	SH.11.87	3.9103e+07	25.2208	21.1064	29.5976
AT.211.89	NL.620.89	4.32028e+07	25.3646	21.1731	29.8168
SP.34.89	NL.330.85	767550	19.5499	15.3418	23.8142
SP.34.89	NL.450.88	4.80042e+06	22.1947	17.9117	26.4194
SP.34.89	WE.4.85	7.95444e+06	22.9233	18.7781	27.2809
SP.34.89	VI.7.87	667416	19.3482	15.08	23.6848
SP.34.89	SI.2.87	1.59298e+06	20.6033	16.4469	24.9614
SP.34.89	CO.2.86	1.61885e+08	27.2704	23.0004	31.6073
SP.34.89	SH.11.87	3.53315e+07	25.0745	20.8759	29.4132
SP.34.89	NL.620.89	3.89431e+07	25.2149	20.8135	29.4449
SP.36.89	NL.330.85	955207	19.8655	15.5221	24.1463
SP.36.89	NL.450.88	2.96989e+06	21.502	17.1899	25.7041
SP.36.89	WE.4.85	4.90162e+06	22.2248	17.8317	26.3655
SP.36.89	VI.7.87	1.63689e+06	20.6425	16.1717	24.9182
SP.36.89	SI.2.87	1.97267e+06	20.9117	16.6974	25.1674
SP.36.89	CO.2.86	2.00596e+08	27.5797	23.2503	31.9382
SP.36.89	SH.11.87	4.35214e+07	25.3752	21.1832	29.7237
SP.36.89	NL.620.89	2.39129e+07	24.5113	20.397	28.9297
SP.53.89	NL.330.85	1.83827e+06	20.8099	16.6245	25.203
SP.53.89	NL.450.88	1.14736e+07	23.4518	18.9552	27.6322
SP.53.89	WE.4.85	4.80263e+06	22.1954	17.9411	26.5651
SP.53.89	VI.7.87	3.1541e+06	21.5888	17.264	25.795
SP.53.89	SI.2.87	1.51971e+07	23.8573	19.7365	28.3496
SP.53.89	CO.2.86	7.73897e+08	29.5276	25.2705	33.7367
SP.53.89	SH.11.87	4.21493e+07	25.329	21.1506	29.7329
SP.53.89	NL.620.89	4.62982e+07	25.4645	21.319	30.0661
VI.1.89	NL.330.85	786141	19.5844	15.2363	23.8846
VI.1.89	NL.450.88	1.22053e+06	20.2191	15.9078	24.5114
VI.1.89	WE.4.85	2.03486e+06	20.9565	16.6459	25.3141
VI.1.89	VI.7.87	168447	17.3619	13.0045	21.5648
VI.1.89	SI.2.87	1.6355e+06	20.6413	16.4204	25.0143
VI.1.89	CO.2.86	8.18788e+07	26.287	21.8784	30.4827
VI.1.89	SH.11.87	7.17308e+07	26.0961	21.9004	30.5109
VI.1.89	NL.620.89	2.49439e+06	21.2503	17.0365	25.5805
ME.5.90	NL.330.85	870246	19.7311	15.5719	24.0864
ME.5.90	NL.450.88	1.08131e+07	23.3663	19.0267	27.5939
ME.5.90	WE.4.85	1.81556e+07	24.1139	19.8427	28.4048
ME.5.90	VI.7.87	6.00733e+06	22.5183	18.3237	26.7841
ME.5.90	SI.2.87	1.78743e+06	20.7695	16.5659	25.1744
ME.5.90	CO.2.86	1.45835e+09	30.4417	26.1691	34.7406
ME.5.90	SH.11.87	7.92275e+07	26.2395	21.9379	30.4785
ME.5.90	NL.620.89	4.37389e+07	25.3824	21.0126	29.6801
SH.24.90	NL.450.88	1.1594e+06	20.145	15.7812	24.3556
SH.24.90	LY.1149.91	544130	19.0536	14.7352	23.3041
SH.24.90	MA.G252.93	540918	19.0451	14.7169	23.3316
SH.24.90	NL.172.96	94164.8	16.5229	12.1411	20.8222
SH.24.90	SI.2.87	769362	19.5533	15.1346	23.7622
SH.24.90	SH.11.87	6.85214e+07	26.0301	21.7297	30.3465
SH.24.90	NL.620.89	4.71095e+06	22.1676	18.214	26.8113
SH.24.90	BE.353.89	864923	19.7222	15.3699	23.8709
SH.24.90	BE.32A.92	5.78545e+06	22.464	18.258	26.8561
SH.24.90	HK.34.90	5.75208e+07	25.7776	21.5938	30.13
SH.24.90	BE.32B.92	1.50608e+07	23.8443	19.4957	28.1011
SH.24.90	SD.9.93	5.37868e+06	22.3588	18.1543	26.7208
SH.24.90	GD.25.93	114738	16.808	12.6233	21.0205
SH.24.90	JO.33.94	159046	17.2791	13.0885	21.6175
SH.24.90	FI.338.95	85187.3	16.3783	12.0931	20.5909
BE.32.92	NL.450.88	306852	18.2272	14.1124	22.6215
BE.32.92	LY.1149.91	393579	18.5863	14.3416	22.8859
BE.32.92	MA.G252.93	564455	19.1065	14.9255	23.4669
BE.32.92	NL.1.95	243421	17.8931	13.4185	22.0357
BE.32.92	NL.218.95	513436	18.9698	14.7488	23.2521
BE.32.92	NL.172.96	260756	17.9923	13.8247	22.4376
BE.32.92	NL.620.89	612096	19.2234	14.7441	23.3807
BE.32.92	GU.54.89	248274	17.9216	13.7477	22.2809
BE.32.92	BE.353.89	454961	18.7954	14.331	23.0065
BE.32.92	BE.32A.92	1.37852e+07	23.7166	19.3163	27.9177
BE.32.92	HK.34.90	6.08641e+07	25.8591	21.5369	30.094
BE.32.92	BE.32B.92	2.23032e+07	24.4107	20.2489	28.9481
BE.32.92	SD.9.93	6.44678e+06	22.6201	18.2036	26.8879
BE.32.92	GD.25.93	578942	19.1431	14.8394	23.3938
BE.32.92	JO.33.94	459294	18.8091	14.4315	23.107
BE.32.92	NL.47.95	80388	16.2947	11.9336	20.4324
BE.32.92	NA.933.95	220259	17.7488	13.4006	21.9845
BE.32.92	LY.2279.95	104530	16.6736	12.3331	20.9392
BE.32.92	SP.1.96	83425.2	16.3482	12.1412	20.7955
BE.32.92	BE.32V.92	1.02346e+07	23.2869	18.8173	27.4188
BE.32.92	NL.286.97	210430	17.683	13.3468	21.894
FI.247.92	NL.450.88	104168	16.6686	12.4842	20.9683
FI.247.92	MA.G252.93	771225	19.5568	15.2163	23.7104
FI.247.92	SI.2.87	69558	16.0859	11.7951	20.3676
FI.247.92	NL.620.89	423902	18.6934	14.5531	23.0794
FI.247.92	BE.353.89	156343	17.2544	13.0467	21.6103
FI.247.92	BE.32A.92	8.32992e+06	22.9899	18.7909	27.2887
FI.247.92	HK.34.90	2.5895e+06	21.3042	17.1399	25.6493
FI.247.92	BE.32B.92	2.70721e+06	21.3684	17.035	25.5442
FI.247.92	SD.9.93	1.78313e+07	24.0879	19.7418	28.2887
NL.938.92	NL.450.88	1.8744e+06	20.838	16.7304	25.4416
NL.938.92	LY.1149.91	689955	19.3961	14.8594	23.4669
NL.938.92	MA.G252.93	214060	17.7077	13.1717	21.7633
NL.938.92	NL.172.96	289721	18.1443	13.8586	22.4894
NL.938.92	SI.2.87	305886	18.2226	13.873	22.537
NL.938.92	SH.11.87	5.43559e+07	25.6959	21.4726	30.1525
NL.938.92	NL.620.89	3.75878e+06	21.8418	17.3808	25.9809
NL.938.92	BE.353.89	555338	19.083	14.8337	23.3295
NL.938.92	BE.32A.92	6.89968e+06	22.7181	18.4484	26.9722
NL.938.92	HK.34.90	2.92136e+07	24.8001	20.4482	29.0658
NL.938.92	BE.32B.92	1.19984e+07	23.5163	19.3426	27.8085
NL.938.92	SD.9.93	1.13367e+07	23.4345	19.2825	27.8712
NL.938.92	GD.25.93	461788	18.8169	14.5605	23.1721
NL.938.92	JO.33.94	509088	18.9576	14.6833	23.1317
NL.938.92	FI.338.95	238624	17.8644	13.501	22.0643
NL.938.92	LY.2279.95	104415	16.672	12.3468	20.8189
NL.938.92	NL.18.94	368957	18.4931	14.0506	22.6851
SE.C273.92	MA.G252.93	743660	19.5043	15.2412	23.8282
SE.C273.92	NL.172.96	249828	17.9306	13.6849	22.2611
SE.C273.92	NL.620.89	201979	17.6238	13.2291	21.8623
SE.C273.92	BE.32A.92	7.59243e+06	22.8561	18.3666	27.0233
SE.C273.92	HK.34.90	1.7679e+06	20.7536	16.4752	25.0497
SE.C273.92	BE.32B.92	1.0385e+07	23.308	19.0931	27.7022
SE.C273.92	SD.9.93	3.17291e+07	24.9193	20.5795	28.9669
SE.C273.92	GD.25.93	631355	19.2681	14.8973	23.4685
SE.C273.92	JO.33.94	1.00814e+06	19.9433	15.5782	24.1232
SE.C273.92	FI.338.95	2.81623e+06	21.4253	17.1988	25.6969
SE.C273.92	LY.2279.95	209236	17.6748	13.4781	21.9962
SE.C273.92	NL.18.94	352646	18.4279	13.997	22.7824
ST.12.92	NL.450.88	405482	18.6293	14.523	23.1322
ST.12.92	LY.1149.91	190552	17.5398	13.2587	21.7028
ST.12.92	NL.172.96	582161	19.1511	14.6397	23.2957
ST.12.92	SI.2.87	268874	18.0366	13.8525	22.5892
ST.12.92	SH.11.87	1.50038e+06	20.5169	16.3908	24.8699
ST.12.92	NL.620.89	1.63413e+06	20.6401	16.3744	24.9859
ST.12.92	BE.353.89	2.40726e+06	21.199	16.8707	25.5078
ST.12.92	BE.32A.92	2.27767e+07	24.4411	20.1399	28.7914
ST.12.92	HK.34.90	5.02845e+06	22.2617	17.7948	26.3919
ST.12.92	SD.9.93	4.58524e+07	25.4505	21.3662	29.9577
ST.12.92	GD.25.93	2.58744e+06	21.3031	17.1627	25.6347
ST.12.92	JO.33.94	4.68863e+06	22.1607	17.69	26.2536
ST.12.92	FI.338.95	7.15249e+06	22.77	18.4868	27.0778
ST.12.92	NA.933.95	390212	18.5739	14.5193	23.0698
ST.12.92	LY.2279.95	963810	19.8784	15.4787	24.0803
ST.12.92	NL.18.94	2.83857e+06	21.4367	17.1269	25.8154
ST.13.92	NL.450.88	1.25271e+07	23.5785	19.4223	27.8066
ST.13.92	VI.2.90	7.44525e+06	22.8279	18.6348	27.0478
ST.13.92	LY.1149.91	1.19209e+07	23.507	19.4796	27.9991
ST.13.92	NL.172.96	83914.6	16.3566	12.1032	20.8161
ST.13.92	SI.2.87	2.06921e+06	20.9807	16.6898	25.2673
ST.13.92	SH.11.87	1.15225e+07	23.458	19.288	27.7878
ST.13.92	NL.620.89	3.15475e+06	21.5891	17.2729	25.7733
ST.13.92	BE.353.89	9.36221e+06	23.1584	18.8405	27.4343
ST.13.92	BE.32A.92	483452	18.883	14.5292	23.1877
ST.13.92	SD.9.93	1.83446e+06	20.8069	16.4568	25.0638
ST.13.92	FI.338.95	114603	16.8063	12.4738	21.0086
UM.1982.92	NL.450.88	2.39908e+06	21.194	16.8829	25.4061
UM.1982.92	VI.2.90	2.87382e+06	21.4545	17.2602	25.8635
UM.1982.92	LY.1149.91	8.99102e+06	23.1001	18.8467	27.1267
UM.1982.92	SI.2.87	400567	18.6117	14.4095	22.9235
UM.1982.92	SH.11.87	2.18715e+06	21.0606	16.7865	25.4177
UM.1982.92	NL.620.89	9.73469e+06	23.2147	19.1811	27.7902
UM.1982.92	BE.353.89	3.57752e+06	21.7705	17.6062	26.1581
UM.1982.92	BE.32A.92	744515	19.5059	15.4263	24.0235
UM.2000.92	NL.450.88	3.27634e+06	21.6437	17.4251	26.0199
UM.2000.92	VI.2.90	7.86258e+06	22.9066	18.5752	27.1336
UM.2000.92	LY.1149.91	2.47124e+07	24.5587	20.3642	28.8861
UM.2000.92	MA.G252.93	191221	17.5449	13.2247	21.8829
UM.2000.92	NL.172.96	131901	17.0091	12.5236	21.2195
UM.2000.92	SI.2.87	274247	18.0651	13.799	22.3904
UM.2000.92	SH.11.87	3.0327e+06	21.5322	17.2438	25.8063
UM.2000.92	NL.620.89	1.34117e+07	23.677	19.3009	27.9663
UM.2000.92	BE.353.89	4.92308e+06	22.2311	18.2452	26.8278
UM.2000.92	BE.32A.92	710413	19.4383	15.3159	23.8406
UM.2000.92	HK.34.90	2.57442e+06	21.2958	16.9569	25.5317
UM.2000.92	BE.32B.92	2.68627e+06	21.3572	16.957	25.5543
UM.2000.92	SD.9.93	2.20657e+06	21.0734	16.6749	25.2462
UM.2000.92	JO.33.94	96370	16.5563	12.2852	20.8931
UM.2000.92	FI.338.95	179979	17.4575	13.2193	21.8391
UM.2000.92	LY.2279.95	92103.1	16.491	12.4011	20.8765
AK.4.93	NL.172.96	263817	18.0092	13.8084	22.4054
AK.4.93	NL.620.89	271729	18.0518	13.7719	22.3824
AK.4.93	BE.353.89	200113	17.6105	13.5056	22.0052
AK.4.93	BE.32A.92	7.05894e+06	22.751	18.6135	27.09
AK.4.93	HK.34.90	3.33809e+06	21.6706	17.3669	26.0286
AK.4.93	SD.9.93	1.50067e+07	23.8391	19.3725	28.0369
AK.4.93	GD.25.93	1.27239e+06	20.2791	15.9921	24.6476
AK.4.93	FI.338.95	3.76666e+06	21.8449	17.5175	25.9639
AK.4.93	NA.933.95	153087	17.224	13.0246	21.7197
AK.4.93	LY.2279.95	430253	18.7148	14.4074	22.9999
AK.4.93	NL.18.94	937897	19.8391	15.3248	23.8796
ES.5458.93	NL.450.88	1.21996e+06	20.2184	15.9634	24.6303
ES.5458.93	VI.2.90	5.87297e+06	22.4857	18.0211	26.6489
ES.5458.93	LY.1149.91	9.19834e+06	23.1329	18.8682	27.5211
ES.5458.93	NL.172.96	327586	18.3215	14.0864	22.5362
ES.5458.93	SI.2.87	203602	17.6354	13.4496	22.0443
ES.5458.93	SH.11.87	1.12325e+06	20.0992	15.919	24.4795
ES.5458.93	NL.620.89	9.79415e+06	23.2235	19.2328	27.7084
ES.5458.93	BE.353.89	3.67677e+06	21.81	17.4288	26.0934
ES.5458.93	BE.32A.92	382911	18.5467	14.0648	22.7721
ES.5458.93	SD.9.93	2.43704e+06	21.2167	16.9869	25.5781
ES.5458.93	JO.33.94	578000	19.1407	14.7991	23.3783
ES.5458.93	FI.338.95	358867	18.4531	14.3379	22.9603
ES.5458.93	NA.933.95	591959	19.1751	14.9378	23.4882
ES.5458.93	LY.2279.95	367949	18.4891	14.3272	22.946
MA.G101.93	NL.450.88	2.78786e+06	21.4107	17.3507	25.884
MA.G101.93	VI.2.90	1.32482e+07	23.6593	19.46	28.0087
MA.G101.93	LY.1149.91	2.0952e+07	24.3206	20.139	28.7532
MA.G101.93	NL.172.96	62475.6	15.931	11.5147	20.0892
MA.G101.93	SI.2.87	460204	18.8119	14.3227	23.0691
MA.G101.93	SH.11.87	2.59317e+06	21.3063	17.0324	25.614
MA.G101.93	NL.620.89	1.12643e+07	23.4253	19.2187	27.6177
MA.G101.93	BE.353.89	8.45425e+06	23.0112	18.6787	27.2344
MA.G101.93	BE.32A.92	1.73822e+06	20.7292	16.4606	24.9489
MA.G101.93	SD.9.93	464390	18.825	14.4786	22.9214
MA.G109.93	NL.450.88	374145	18.5132	14.1563	22.7499
MA.G109.93	LY.1149.91	347722	18.4076	14.0656	22.696
MA.G109.93	NL.172.96	936297	19.8366	15.5126	24.0873
MA.G109.93	SI.2.87	245647	17.9062	13.6219	22.1832
MA.G109.93	SH.11.87	1.3611e+06	20.3763	16.2336	24.7099
MA.G109.93	NL.620.89	1.51346e+06	20.5294	16.2912	24.6893
MA.G109.93	BE.353.89	559007	19.0925	15.0017	23.5949
MA.G109.93	BE.32A.92	1.045e+07	23.317	19.0218	27.6557
MA.G109.93	HK.34.90	2.30739e+06	21.1378	16.9436	25.5269
MA.G109.93	SD.9.93	3.95498e+07	25.2372	20.9819	29.65
MA.G109.93	GD.25.93	1.41653e+07	23.7559	19.4054	27.9403
MA.G109.93	JO.33.94	6.51762e+06	22.6359	18.4526	26.9581
MA.G109.93	FI.338.95	6.94279e+06	22.7271	18.4909	27.204
MA.G109.93	LY.2279.95	2.67247e+06	21.3497	17.1304	25.7491
MA.G109.93	NL.18.94	1.04205e+07	23.3129	18.9551	27.5865
MA.G116.93	NL.450.88	1.49612e+06	20.5128	16.2906	25.0074
MA.G116.93	VI.2.90	7.12089e+06	22.7636	18.5814	27.081
MA.G116.93	LY.1149.91	1.11995e+07	23.4169	19.2691	27.8839
MA.G116.93	NL.172.96	98927.5	16.5941	12.407	21.0232
MA.G116.93	SI.2.87	247866	17.9192	13.6071	22.1923
MA.G116.93	SH.11.87	1.37926e+06	20.3955	15.8799	24.462
MA.G116.93	NL.620.89	6.01729e+06	22.5207	18.2887	26.7298
MA.G116.93	BE.353.89	2.24801e+06	21.1002	16.823	25.4189
MA.G116.93	BE.32A.92	1.85955e+06	20.8265	16.5782	25.0573
MA.G116.93	SD.9.93	1.50533e+06	20.5217	16.1168	24.8017
MA.G122.93	NL.450.88	432336	18.7218	14.4055	22.9202
MA.G122.93	LY.1149.91	407948	18.638	14.308	22.848
MA.G122.93	NL.172.96	1.85483e+06	20.8229	16.7557	25.2443
MA.G122.93	SI.2.87	289368	18.1425	13.9184	22.5278
MA.G122.93	SH.11.87	1.60192e+06	20.6114	16.3762	25.0017
MA.G122.93	NL.620.89	1.74868e+06	20.7378	16.3973	24.923
MA.G122.93	BE.353.89	653004	19.3167	14.9798	23.7008
MA.G122.93	BE.32A.92	2.43473e+07	24.5373	20.0763	28.8019
MA.G122.93	HK.34.90	5.41981e+06	22.3698	18.1954	26.6419
MA.G122.93	SD.9.93	7.32057e+07	26.1255	21.6983	30.31
MA.G122.93	GD.25.93	6.5863e+07	25.973	21.7853	30.246
MA.G122.93	JO.33.94	5.23701e+07	25.6422	21.2069	29.8235
MA.G122.93	FI.338.95	4.90139e+07	25.5467	21.1468	29.7837
MA.G122.93	LY.2279.95	6.25778e+06	22.5772	18.0258	26.6878
MA.G122.93	NL.18.94	2.43682e+07	24.5385	20.1297	28.8704
MA.G130.93	NL.450.88	467785	18.8355	14.651	23.216
MA.G130.93	LY.1149.91	220139	17.7481	13.5472	22.1323
MA.G130.93	NL.172.96	291808	18.1547	13.7298	22.3837
MA.G130.93	SI.2.87	308970	18.2371	13.928	22.468
MA.G130.93	SH.11.87	3.43381e+06	21.7114	17.4612	26.0984
MA.G130.93	NL.620.89	1.88945e+06	20.8495	16.576	25.0421
MA.G130.93	BE.353.89	701873	19.4209	14.9757	23.7298
MA.G130.93	BE.32A.92	2.26633e+07	24.4339	20.1215	28.7186
MA.G130.93	HK.34.90	2.90706e+06	21.4711	17.3186	25.7393
MA.G130.93	SD.9.93	5.99174e+07	25.8365	21.619	30.2547
MA.G130.93	GD.25.93	744395	19.5057	15.3172	23.953
MA.G130.93	JO.33.94	1.75945e+06	20.7467	16.4561	25.002
MA.G130.93	FI.338.95	3.86662e+06	21.8826	17.3212	25.9512
MA.G130.93	LY.2279.95	280530	18.0978	13.77	22.2926
MA.G130.93	NL.18.94	1.02884e+06	19.9726	15.5169	24.1284
NL.3.93	NL.450.88	1.14699e+06	20.1294	16.0523	24.5368
NL.3.93	VI.2.90	342161	18.3843	14.1995	22.7063
NL.3.93	LY.1149.91	1.09085e+06	20.057	15.7303	24.3422
NL.3.93	NL.172.96	505398	18.9471	14.7213	23.2335
NL.3.93	SI.2.87	1.52672e+06	20.542	16.0798	24.837
NL.3.93	SH.11.87	4.23861e+06	22.0152	17.7952	26.2735
NL.3.93	NL.620.89	2.32928e+06	21.1515	16.6903	25.1361
NL.3.93	BE.353.89	864975	19.7223	15.5804	23.9599
NL.3.93	BE.32A.92	2.54368e+07	24.6004	20.5092	29.0343
NL.3.93	HK.34.90	3.5639e+06	21.765	17.3389	25.8884
NL.3.93	SD.9.93	3.22946e+07	24.9448	20.6571	29.1572
NL.3.93	GD.25.93	1.28055e+07	23.6103	19.309	27.9489
NL.3.93	JO.33.94	3.9589e+06	21.9167	17.6909	26.3133
NL.3.93	FI.338.95	9.41629e+06	23.1667	18.9653	27.45
NL.3.93	NA.933.95	276935	18.0792	13.7006	22.3257
NL.3.93	LY.2279.95	1.09269e+06	20.0595	15.9292	24.3229
NL.3.93	NL.18.94	7.03288e+06	22.7457	18.493	27.1451
NL.17.93	NL.450.88	1.05523e+06	20.0091	15.6381	24.1799
NL.17.93	VI.2.90	315622	18.2678	14.1111	22.7024
NL.17.93	LY.1149.91	501626	18.9363	14.585	23.3103
NL.17.93	SI.2.87	701726	19.4205	15.0093	23.7464
NL.17.93	SH.11.87	3.89876e+06	21.8946	17.6244	26.2023
NL.17.93	NL.620.89	4.28536e+06	22.031	17.7378	26.2953
NL.17.93	BE.353.89	1.58443e+06	20.5955	16.3437	24.8438
NL.17.93	BE.32A.92	2.10954e+07	24.3304	20.2956	28.839
NL.101.93	NL.450.88	244238	17.8979	13.4695	22.1717
NL.101.93	LY.1149.91	115948	16.8231	12.7163	21.3689
NL.101.93	NL.172.96	44064.5	15.4273	11.3385	19.9172
NL.101.93	SI.2.87	163517	17.3191	12.9027	21.561
NL.101.93	SH.11.87	908158	19.7926	15.414	24.159
NL.101.93	NL.620.89	503111	18.9405	14.5239	23.2114
NL.101.93	BE.353.89	186929	17.5121	13.0388	21.6229
NL.101.93	HK.34.90	482648	18.8806	14.3411	22.9749
NL.101.93	SD.9.93	6.56197e+06	22.6457	18.1276	26.743
NL.101.93	GD.25.93	98083.2	16.5817	12.2281	20.7457
NL.101.93	JO.33.94	231294	17.8194	13.614	22.1179
NL.101.93	FI.338.95	571965	19.1256	14.9793	23.5353
NL.101.93	LY.2279.95	148366	17.1788	12.9635	21.5469
NL.101.93	NL.18.94	327495	18.3211	13.9114	22.6367
NL.115.93	NL.450.88	338587	18.3692	14.0575	22.6704
NL.115.93	LY.1149.91	317373	18.2758	13.9181	22.582
NL.115.93	NL.172.96	241528	17.8818	13.5326	22.187
NL.115.93	SI.2.87	224390	17.7756	13.3703	21.9192
NL.115.93	SH.11.87	2.48862e+06	21.2469	17.039	25.7294
NL.115.93	NL.620.89	1.36475e+06	20.3802	16.0842	24.7216
NL.115.93	BE.353.89	503182	18.9407	14.6657	23.1917
NL.115.93	HK.34.90	1.86038e+06	20.8272	16.5166	25.1143
NL.115.93	SD.9.93	2.51401e+07	24.5835	20.0338	28.6465
NL.115.93	GD.25.93	609291	19.2168	15.0198	23.5379
NL.115.93	JO.33.94	1.27334e+06	20.2802	16.1695	24.7136
NL.115.93	FI.338.95	2.37821e+06	21.1814	16.7876	25.2849
NL.115.93	LY.2279.95	457736	18.8042	14.2729	22.8865
NL.115.93	NL.18.94	1.04532e+06	19.9955	15.8025	24.3183
NL.126.93	NL.450.88	777816	19.5691	15.1972	23.831
NL.126.93	LY.1149.91	360447	18.4594	14.1209	22.5446
NL.126.93	NL.172.96	139363	17.0885	12.9509	21.5885
NL.126.93	SI.2.87	259007	17.9826	13.6786	22.3359
NL.126.93	SH.11.87	2.87035e+06	21.4528	17.103	25.6298
NL.126.93	NL.620.89	1.56334e+06	20.5762	16.2171	24.8507
NL.126.93	BE.353.89	578672	19.1424	14.8215	23.3929
NL.126.93	HK.34.90	1.19861e+06	20.1929	16.0659	24.5716
NL.126.93	SD.9.93	1.64353e+07	23.9703	19.8086	28.3074
NL.126.93	GD.25.93	463882	18.8234	14.3327	23.1363
NL.126.93	JO.33.94	984119	19.9085	15.5964	24.4376
NL.126.93	FI.338.95	2.0462e+06	20.9645	16.7339	25.2843
NL.126.93	LY.2279.95	132582	17.0165	12.8623	21.3419
NL.126.93	NL.18.94	609224	19.2166	14.9149	23.5274
NL.165.93	NL.450.88	644462	19.2977	14.9096	23.3444
NL.165.93	VI.2.90	3.07468e+06	21.552	17.1233	25.7383
NL.165.93	LY.1149.91	4.88322e+06	22.2194	17.8554	26.3081
NL.165.93	NL.172.96	57271.6	15.8055	11.4508	20.1023
NL.165.93	SI.2.87	213345	17.7028	13.3394	21.8878
NL.165.93	SH.11.87	1.18365e+06	20.1748	16.006	24.5894
NL.165.93	NL.620.89	2.62507e+06	21.3239	17.0782	25.6976
NL.165.93	BE.353.89	1.94115e+06	20.8885	16.5574	25.2036
NL.165.93	BE.32A.92	1.58965e+06	20.6003	16.1597	24.7111
NL.165.93	SD.9.93	857502	19.7098	15.3736	24.0222
NL.165.93	FI.338.95	47097.8	15.5234	11.087	19.6616
NL.179.93	NL.450.88	1.24504e+06	20.2478	15.9527	24.5969
NL.179.93	LY.1149.91	582070	19.1508	14.8019	23.3724
NL.179.93	SH.11.87	4.61469e+06	22.1378	17.9039	26.4988
NL.179.93	NL.620.89	1.27317e+06	20.28	16.0228	24.4872
NL.179.93	BE.353.89	1.86211e+06	20.8285	16.7771	25.2053
NL.179.93	BE.32A.92	2.49588e+07	24.573	20.4423	28.9622
PA.287.93	NL.450.88	2.4128e+06	21.2023	16.9907	25.5271
PA.287.93	VI.2.90	2.8132e+06	21.4238	17.0977	25.7726
PA.287.93	LY.1149.91	8.85221e+06	23.0776	18.9852	27.5393
PA.287.93	SI.2.87	197739	17.5932	13.2488	21.8435
PA.287.93	SH.11.87	2.19997e+06	21.0691	16.6334	25.2123
PA.287.93	NL.620.89	9.65561e+06	23.2029	18.8199	27.3569
PA.287.93	BE.353.89	1.78593e+06	20.7682	16.3773	25.1452
PA.287.93	BE.32A.92	743018	19.503	15.0579	23.6338
SG.6.93	NL.172.96	726598	19.4708	15.1127	23.6992
SG.6.93	NL.620.89	207356	17.6617	13.2487	21.85
SG.6.93	BE.32A.92	1.40671e+07	23.7458	19.6016	28.0658
SG.6.93	HK.34.90	3.18133e+06	21.6012	17.3529	25.9606
SG.6.93	SD.9.93	8.66341e+07	26.3684	22.1213	30.7871
SG.6.93	GD.25.93	1.9629e+06	20.9046	16.6188	25.1917
SG.6.93	JO.33.94	2.59397e+06	21.3067	17.1795	25.6941
SG.6.93	FI.338.95	1.16113e+07	23.469	19.1635	27.9661
SG.6.93	LY.2279.95	1.70928e+06	20.705	16.4295	25.0187
SG.6.93	NL.18.94	723649	19.4649	15.1999	23.675
YA.56.93	NL.172.96	763305	19.5419	15.2388	23.7974
YA.56.93	BE.353.89	320233	18.2888	14.3086	22.848
YA.56.93	BE.32A.92	1.6001e+07	23.9317	19.5491	28.1417
YA.56.93	HK.34.90	2.6862e+06	21.3571	17.1062	25.5649
YA.56.93	SD.9.93	4.56036e+07	25.4426	21.2093	29.7324
YA.56.93	GD.25.93	1.35488e+06	20.3697	15.9909	24.5255
YA.56.93	JO.33.94	2.15027e+06	21.0361	16.7214	25.3825
YA.56.93	FI.338.95	6.98401e+06	22.7356	18.4182	27.0312
YA.56.93	LY.2279.95	771110	19.5566	15.2691	23.8363
YA.56.93	NL.18.94	931812	19.8297	15.3824	23.8541
YA.61.93	NL.172.96	72259.2	16.1409	11.9265	20.513
YA.61.93	NL.620.89	157314	17.2633	12.9371	21.5364
YA.61.93	BE.353.89	116641	16.8317	12.6252	21.2017
YA.61.93	HK.34.90	1.08238e+06	20.0458	15.6802	24.2202
YA.61.93	SD.9.93	1.16209e+07	23.4702	19.1595	27.7418
YA.61.93	GD.25.93	429670	18.7129	14.5388	23.1472
YA.61.93	JO.33.94	686323	19.3885	15.1445	23.8406
YA.61.93	FI.338.95	1.80133e+06	20.7806	16.3668	25.0267
YA.61.93	LY.2279.95	231823	17.8227	13.6288	22.3952
YA.61.93	NL.18.94	358985	18.4536	14.2168	22.7301
YA.62.93	NL.172.96	585517	19.1594	14.8988	23.44
YA.62.93	NL.620.89	187286	17.5149	13.2914	21.7887
YA.62.93	BE.32A.92	9.65877e+06	23.2034	18.9441	27.4933
YA.62.93	HK.34.90	1.42848e+06	20.446	16.1551	24.7206
YA.62.93	SD.9.93	2.72798e+07	24.7013	20.4522	29.1072
YA.62.93	GD.25.93	512916	18.9684	14.6711	23.2565
YA.62.93	JO.33.94	1.16059e+06	20.1464	15.9371	24.4211
YA.62.93	FI.338.95	4.30413e+06	22.0373	17.6637	26.198
YA.62.93	LY.2279.95	499366	18.9297	14.9384	23.4854
YA.62.93	NL.18.94	1.45917e+06	20.4767	16.1988	24.8173
NL.399.93	LY.1149.91	270435	18.0449	13.7294	22.2844
NL.399.93	MA.G252.93	4.27696e+06	22.0282	17.8721	26.5115
NL.399.93	NL.172.96	2.05015e+06	20.9673	16.6404	25.2692
NL.399.93	BE.353.89	433186	18.7246	14.5768	23.1177
NL.399.93	BE.32A.92	3.41735e+06	21.7044	17.3106	25.8399
NL.399.93	HK.34.90	653779	19.3184	14.9753	23.4937
NL.399.93	BE.32B.92	2.15519e+06	21.0394	16.7037	25.2317
NL.399.93	SD.9.93	8.0876e+06	22.9473	18.4795	27.1732
NL.399.93	GD.25.93	403740	18.6231	14.4025	22.9135
NL.399.93	JO.33.94	1.08799e+06	20.0532	15.676	24.1797
NL.399.93	FI.338.95	1.6944e+06	20.6923	16.6464	25.1309
NL.399.93	LY.2279.95	1.20648e+06	20.2024	15.8866	24.4462
NL.399.93	NL.18.94	1.41789e+07	23.7572	19.4202	28.0086
SD.9.93	MA.G252.93	1.57986e+06	20.5914	16.3607	24.9541
SD.9.93	NL.1.95	1.70413e+06	20.7006	16.3418	24.9439
SD.9.93	NL.218.95	2.67506e+06	21.3511	17.0473	25.6312
SD.9.93	NL.172.96	342989	18.3878	14.2257	22.8104
SD.9.93	SH.11.87	438909	18.7436	14.6295	23.1306
SD.9.93	BE.32A.92	1.50617e+07	23.8444	19.5847	28.2092
SD.9.93	HK.34.90	2.80417e+06	21.4191	17.207	25.7887
SD.9.93	BE.32B.92	9.9014e+06	23.2392	18.7462	27.3827
SD.9.93	SD.9.93	3.54204e+07	25.0781	20.6108	29.3165
SD.9.93	OS.2352.93	1.89775e+07	24.1778	19.8639	28.352
SD.9.93	PR.413.94	992268	19.9204	15.4531	24.0257
SD.9.93	JO.33.94	1.83871e+06	20.8103	16.4745	24.9912
SD.9.93	GE.A9509.95	4.49445e+06	22.0997	17.7855	26.3826
SD.9.93	FI.338.95	4.50061e+06	22.1017	17.6376	26.3172
SD.9.93	NL.47.95	2.5155e+06	21.2624	17.1876	25.7205
SD.9.93	NA.933.95	462844	18.8202	14.4519	22.9602
SD.9.93	LY.2279.95	252480	17.9458	13.9079	22.5335
SD.9.93	BE.32V.92	2.36807e+06	21.1753	16.7981	25.4469
LY.672.93	LY.1149.91	230052	17.8116	13.4747	22.0388
LY.672.93	MA.G252.93	818735	19.643	15.455	24.0289
LY.672.93	NL.1.95	2.22256e+06	21.0838	16.8028	25.4553
LY.672.93	NL.172.96	470265	18.8431	14.507	23.1115
LY.672.93	BE.353.89	238425	17.8632	13.6015	22.2856
LY.672.93	BE.32A.92	4.0414e+06	21.9464	17.7949	26.269
LY.672.93	HK.34.90	1.25907e+06	20.2639	15.8759	24.4894
LY.672.93	BE.32B.92	1.81482e+06	20.7914	16.5547	24.9871
LY.672.93	SD.9.93	1.14592e+07	23.45	19.2852	27.81
LY.672.93	OS.2352.93	1.76342e+07	24.0719	19.6362	28.208
LY.672.93	PR.413.94	1.12367e+06	20.0998	15.8097	24.4143
LY.672.93	JO.33.94	774452	19.5628	15.3313	23.8944
LY.672.93	FI.338.95	5.16612e+06	22.3007	18.0671	26.6919
LY.672.93	LY.2279.95	526197	19.0052	14.4454	23.1542
LY.672.93	NL.18.94	1.34426e+06	20.3584	16.1418	24.7926
LY.1803.93	LY.1149.91	195771	17.5788	13.3034	21.9097
LY.1803.93	BE.353.89	315108	18.2655	14.1063	22.6354
LY.1803.93	BE.32A.92	4.16285e+06	21.9891	17.8207	26.3258
LY.1803.93	HK.34.90	2.57781e+06	21.2977	17.002	25.4699
LY.1803.93	BE.32B.92	3.85405e+06	21.8779	17.6187	26.1355
NL.357.93	LY.1149.91	306076	18.2235	14.2292	22.7111
NL.357.93	NL.172.96	410162	18.6458	14.3521	23.0042
NL.357.93	BE.353.89	488107	18.8968	14.5645	23.1416
NL.357.93	BE.32A.92	1.40768e+07	23.7468	19.3233	27.971
NL.357.93	HK.34.90	4.67145e+06	22.1554	18.0332	26.5473
NL.357.93	BE.32B.92	1.19957e+07	23.516	19.2767	27.7415
NL.357.93	SD.9.93	4.16596e+07	25.3121	21.1861	29.6284
NL.357.93	GD.25.93	3.106e+06	21.5666	17.3168	25.8261
NL.357.93	JO.33.94	4.15645e+06	21.9869	17.9749	26.4594
NL.357.93	FI.338.95	1.2252e+07	23.5465	19.4035	27.9353
NL.357.93	LY.2279.95	1.57881e+06	20.5904	16.3638	24.93
NL.357.93	NL.18.94	2.3094e+06	21.1391	16.9231	25.6159
NL.371.93	LY.1149.91	154917	17.2411	13.1487	21.6428
NL.371.93	MA.G252.93	2.42751e+06	21.211	16.8924	25.4566
NL.371.93	NL.172.96	440476	18.7487	14.5331	22.9006
NL.371.93	BE.353.89	247315	17.916	13.6443	22.1894
NL.371.93	BE.32A.92	3.12108e+06	21.5736	17.2025	25.8517
NL.371.93	HK.34.90	492970	18.9111	14.8346	23.5407
NL.371.93	BE.32B.92	2.12269e+06	21.0175	16.8223	25.3673
NL.371.93	SD.9.93	1.5343e+07	23.8711	19.4974	28.0981
NL.371.93	GD.25.93	1.25556e+07	23.5818	19.2583	27.8897
NL.371.93	JO.33.94	5.77464e+06	22.4613	18.2387	26.7808
NL.371.93	FI.338.95	2.6712e+06	21.3491	17.1426	25.7691
NL.371.93	NA.933.95	315469	18.2671	14.0031	22.7179
NL.371.93	LY.2279.95	1.04271e+06	19.9919	15.6564	24.1042
NL.371.93	NL.18.94	4.0639e+06	21.9544	17.6819	26.1932
NL.372.93	LY.1149.91	493320	18.9122	14.7128	23.3348
NL.372.93	MA.G252.93	1.54463e+07	23.8808	19.4417	28.1215
NL.372.93	NL.172.96	1.49221e+06	20.509	16.1764	24.7618
NL.372.93	BE.353.89	786761	19.5856	15.233	23.7693
NL.372.93	BE.32A.92	1.30552e+06	20.3162	16.2001	24.7627
NL.372.93	HK.34.90	682479	19.3804	15.19	23.717
NL.372.93	BE.32B.92	2.12606e+06	21.0197	16.5454	25.1337
NL.372.93	SD.9.93	1.06366e+07	23.3425	18.9493	27.5326
NL.372.93	GD.25.93	2.08984e+06	20.995	16.7315	25.3129
NL.372.93	JO.33.94	2.64491e+06	21.3348	17.1009	25.6176
NL.372.93	FI.338.95	3.66218e+06	21.8043	17.5484	26.0301
NL.372.93	LY.2279.95	1.00178e+07	23.2561	18.9331	27.4636
NL.372.93	NL.18.94	5.8921e+07	25.8123	21.4573	30.0377
NL.398.93	LY.1149.91	711798	19.4411	15.1735	23.8221
NL.398.93	NL.172.96	1.61187e+06	20.6203	16.3694	24.8704
NL.398.93	BE.353.89	1.12648e+06	20.1034	15.7544	24.3731
NL.398.93	BE.32A.92	2.87857e+07	24.7788	20.2307	28.8739
NL.398.93	HK.34.90	1.27175e+07	23.6003	19.378	27.9383
NL.398.93	BE.32B.92	1.96727e+07	24.2297	19.9272	28.5475
NL.398.93	SD.9.93	5.6156e+07	25.7429	21.4529	30.0217
NL.398.93	GD.25.93	1.68655e+07	24.0076	19.6283	28.1727
NL.398.93	JO.33.94	6.62226e+06	22.6589	18.3774	26.9392
NL.398.93	FI.338.95	8.77083e+06	23.0643	18.7484	27.3653
NL.398.93	LY.2279.95	6.3049e+06	22.588	18.1545	26.6313
NL.398.93	NL.18.94	2.11263e+07	24.3325	19.9524	28.6408
NL.440.93	LY.1149.91	407133	18.6351	14.1653	22.6805
NL.440.93	NL.172.96	768796	19.5522	15.1629	23.7149
NL.440.93	BE.353.89	1.12456e+06	20.1009	15.8885	24.4134
NL.440.93	BE.32A.92	2.46028e+07	24.5523	20.2029	28.671
NL.440.93	HK.34.90	5.76933e+06	22.46	18.3093	26.6996
NL.440.93	BE.32B.92	1.58004e+07	23.9135	19.756	28.2983
NL.440.93	SD.9.93	9.21539e+07	26.4575	21.9577	30.6986
NL.440.93	GD.25.93	2.73461e+06	21.3829	17.2871	25.8299
NL.440.93	JO.33.94	3.8323e+06	21.8698	17.5111	26.1309
NL.440.93	FI.338.95	1.20565e+07	23.5233	19.3136	27.8449
NL.440.93	LY.2279.95	2.03973e+06	20.9599	16.5314	25.1248
NL.440.93	NL.18.94	3.03039e+06	21.5311	17.0461	25.712
OS.2219.93	LY.1149.91	152684	17.2202	12.8016	21.3589
OS.2219.93	NL.172.96	1.38829e+06	20.4049	16.088	24.6764
OS.2219.93	BE.353.89	490586	18.9041	14.6314	23.2777
OS.2219.93	BE.32A.92	8.16624e+06	22.9612	18.6824	27.2552
OS.2219.93	HK.34.90	1.46044e+06	20.478	16.1466	24.6971
OS.2219.93	BE.32B.92	5.98731e+06	22.5135	18.1106	26.7139
OS.2219.93	SD.9.93	9.80672e+07	26.5473	22.1267	30.7347
OS.2219.93	GD.25.93	1.66155e+07	23.986	19.7264	28.2768
OS.2219.93	JO.33.94	1.31571e+07	23.6493	19.2622	27.9821
OS.2219.93	FI.338.95	1.54009e+07	23.8765	19.5041	28.1263
OS.2219.93	LY.2279.95	3.11696e+06	21.5717	17.1724	25.6942
OS.2219.93	NL.18.94	1.14375e+07	23.4473	19.1955	27.7452
OS.2352.93	MA.G252.93	620299	19.2426	14.9198	23.4321
OS.2352.93	NL.1.95	3.75776e+06	21.8414	17.5117	26.1928
OS.2352.93	NL.172.96	168710	17.3642	13.0019	21.5506
OS.2352.93	BE.353.89	249751	17.9301	13.6437	22.2864
OS.2352.93	BE.32A.92	6.41987e+06	22.6141	18.37	26.9745
OS.2352.93	HK.34.90	1.90086e+06	20.8582	16.7608	25.4373
OS.2352.93	BE.32B.92	4.41633e+06	22.0744	17.8277	26.4605
OS.2352.93	SD.9.93	1.99117e+07	24.2471	20.1777	28.808
OS.2352.93	OS.2352.93	2.13073e+07	24.3448	20.0103	28.6165
OS.2352.93	PR.413.94	557925	19.0897	14.8071	23.4365
OS.2352.93	GD.25.93	309702	18.2405	13.9854	22.512
OS.2352.93	JO.33.94	1.3446e+06	20.3587	16.3085	24.8188
OS.2352.93	FI.338.95	5.69084e+06	22.4402	17.9851	26.6228
OS.2352.93	LY.2279.95	283024	18.1106	13.7546	22.3406
OS.2352.93	NL.18.94	474088	18.8548	14.5961	23.0911
ST.20.93	LY.1149.91	503635	18.942	14.8229	23.4844
ST.20.93	MA.G252.93	4.90206e+06	22.225	17.9786	26.4151
ST.20.93	NL.172.96	1.71813e+06	20.7124	16.4534	25.0508
ST.20.93	BE.353.89	789017	19.5897	15.1534	23.8153
ST.20.93	BE.32A.92	6.00742e+06	22.5183	18.0162	26.5375
ST.20.93	HK.34.90	1.81546e+06	20.7919	16.4855	25.0237
ST.20.93	BE.32B.92	5.5054e+06	22.3924	17.9656	26.5938
ST.20.93	SD.9.93	2.74302e+07	24.7093	20.3142	28.8639
ST.20.93	GD.25.93	1.77252e+07	24.0793	19.8073	28.4182
ST.20.93	JO.33.94	8.68851e+06	23.0507	18.8409	27.4801
ST.20.93	FI.338.95	7.62553e+06	22.8624	18.551	27.0592
ST.20.93	NA.933.95	892497	19.7675	15.6742	24.174
ST.20.93	LY.2279.95	1.58999e+06	20.6006	16.1709	24.7379
ST.20.93	NL.18.94	6.5048e+06	22.6331	18.4112	26.9154
VI.104.93	LY.1149.91	229305	17.8069	13.5323	21.9472
VI.104.93	NL.172.96	2.08679e+06	20.9929	16.7079	25.3612
VI.104.93	BE.353.89	365575	18.4798	14.3248	22.8188
VI.104.93	BE.32A.92	1.93498e+07	24.2058	20.2199	28.6215
VI.104.93	HK.34.90	3.66799e+06	21.8066	17.5243	26.1801
VI.104.93	BE.32B.92	1.26323e+07	23.5906	19.4942	28.0138
VI.104.93	SD.9.93	1.04624e+08	26.6406	22.3572	30.9543
VI.104.93	GD.25.93	1.52637e+06	20.5417	16.1724	24.8905
VI.104.93	JO.33.94	2.4719e+06	21.2372	16.9227	25.5161
VI.104.93	FI.338.95	5.74575e+06	22.4541	17.9781	26.6881
VI.104.93	LY.2279.95	1.01953e+06	19.9595	15.5513	24.0948
VI.104.93	NL.18.94	3.84905e+06	21.8761	17.5779	26.2755
WE.59.93	LY.1149.91	91185.3	16.4765	12.2479	20.9151
WE.59.93	NL.172.96	1.38235e+06	20.3987	16.1139	24.6954
WE.59.93	BE.353.89	288835	18.1399	14.0291	22.5462
WE.59.93	BE.32A.92	8.43356e+06	23.0077	18.57	27.0864
WE.59.93	HK.34.90	1.74386e+06	20.7339	16.5275	24.9565
WE.59.93	BE.32B.92	3.53112e+06	21.7517	17.5777	26.1172
WE.59.93	SD.9.93	2.88745e+07	24.7833	20.2362	28.8615
WE.59.93	GD.25.93	7.42602e+06	22.8242	18.4554	27.0563
WE.59.93	JO.33.94	7.83781e+06	22.902	18.6465	27.0751
WE.59.93	FI.338.95	9.08785e+06	23.1155	18.7574	27.32
WE.59.93	LY.2279.95	1.62362e+06	20.6308	16.001	24.6534
WE.59.93	NL.18.94	4.06541e+06	21.955	17.6925	26.3242
SP.19.93	LY.1149.91	403066	18.6207	14.3725	22.8438
SP.19.93	MA.G252.93	6.35971e+06	22.6005	18.3258	26.8315
SP.19.93	NL.172.96	2.44671e+06	21.2224	17.0187	25.5545
SP.19.93	BE.353.89	642466	19.2933	15.0004	23.5991
SP.19.93	BE.32A.92	2.95598e+06	21.4952	17.1927	25.7987
SP.19.93	BE.32B.92	2.78614e+06	21.4098	17.1389	25.7195
SP.19.93	SD.9.93	9.07649e+06	23.1137	18.8024	27.2944
SP.19.93	GD.25.93	1.20933e+06	20.2058	15.8724	24.4604
SP.19.93	JO.33.94	2.15359e+06	21.0383	16.7666	25.4722
SP.19.93	FI.338.95	2.5118e+06	21.2603	16.8212	25.4782
SP.19.93	LY.2279.95	5.11894e+06	22.2874	18.1158	26.6217
SP.19.93	NL.18.94	6.00244e+07	25.839	21.6348	30.0636
LY.1815.93	LY.1149.91	429277	18.7115	14.3697	22.8789
LY.1815.93	NL.172.96	2.28134e+06	21.1215	16.6755	25.3311
LY.1815.93	BE.353.89	344122	18.3926	14.0649	22.7025
LY.1815.93	BE.32A.92	8.44113e+06	23.009	18.7308	27.2264
LY.1815.93	HK.34.90	2.84076e+06	21.4378	17.2658	25.7931
LY.1815.93	BE.32B.92	5.90749e+06	22.4941	18.2899	26.8623
LY.1815.93	SD.9.93	5.83796e+07	25.799	21.5017	30.1805
LY.1815.93	GD.25.93	5.21973e+07	25.6375	21.1866	29.8129
LY.1815.93	JO.33.94	2.07978e+07	24.3099	19.9778	28.5478
LY.1815.93	FI.338.95	1.92352e+07	24.1972	19.8441	28.4464
LY.1815.93	LY.2279.95	4.37816e+06	22.0619	17.5869	26.1896
LY.1815.93	NL.18.94	1.26988e+07	23.5982	19.4285	28.0284
LY.22686.93	LY.1149.91	239614	17.8704	13.577	22.1876
LY.22686.93	NL.172.96	228436	17.8014	13.4648	21.9958
LY.22686.93	BE.353.89	382617	18.5455	14.2324	22.7104
LY.22686.93	BE.32A.92	2.84348e+06	21.4392	17.134	25.5884
LY.22686.93	HK.34.90	1.59261e+06	20.603	16.1355	24.6961
LY.22686.93	BE.32B.92	3.33286e+06	21.6683	17.2945	25.9042
LY.22686.93	SD.9.93	2.72169e+07	24.698	20.3503	28.8795
LY.22686.93	GD.25.93	6.5082e+06	22.6338	18.3905	26.8812
LY.22686.93	JO.33.94	6.45451e+06	22.6219	18.4725	27.0425
LY.22686.93	FI.338.95	4.18137e+06	21.9955	17.5906	26.157
LY.22686.93	LY.2279.95	920878	19.8126	15.5825	24.1338
LY.22686.93	NL.18.94	3.59062e+06	21.7758	17.255	26.0341
LY.23602.93	LY.1149.91	1.19874e+06	20.1931	15.9784	24.5649
LY.23602.93	NL.172.96	677378	19.3696	15.0651	23.6385
LY.23602.93	BE.353.89	944386	19.849	15.3768	24.0188
LY.23602.93	BE.32A.92	7.06294e+06	22.7518	18.3268	26.8615
LY.23602.93	HK.34.90	3.11661e+06	21.5715	17.2356	25.8455
LY.23602.93	BE.32B.92	8.18762e+06	22.965	18.7143	27.2904
LY.23602.93	SD.9.93	5.41916e+07	25.6916	21.3754	30.0537
LY.23602.93	GD.25.93	7.03154e+06	22.7454	18.3103	26.9731
LY.23602.93	JO.33.94	1.6029e+07	23.9342	19.6831	28.2441
LY.23602.93	FI.338.95	1.48534e+07	23.8243	19.5583	28.164
LY.23602.93	LY.2279.95	6.12332e+06	22.5459	18.2949	26.8714
LY.23602.93	NL.18.94	1.33385e+07	23.6691	19.463	27.9753
SP.3.93	LY.1149.91	106191	16.6963	12.3412	20.9609
SP.3.93	MA.G252.93	831722	19.6657	15.4789	24.0182
SP.3.93	NL.172.96	321792	18.2958	13.8595	22.4802
SP.3.93	BE.353.89	168928	17.3661	13.0375	21.5506
SP.3.93	BE.32A.92	5.41554e+06	22.3687	17.8747	26.4579
SP.3.93	HK.34.90	1.51536e+06	20.5312	16.343	24.9192
SP.3.93	BE.32B.92	5.88118e+06	22.4877	18.1164	26.6647
SP.3.93	SD.9.93	3.04611e+07	24.8605	20.5504	29.1078
SP.3.93	GD.25.93	537511	19.0359	14.5192	23.1156
SP.3.93	JO.33.94	991568	19.9194	15.6495	24.1431
SP.3.93	FI.338.95	3.18655e+06	21.6036	17.3258	25.8553
SP.3.93	LY.2279.95	335944	18.3579	14.1149	22.5959
SP.3.93	NL.18.94	696087	19.4089	15.1071	23.5882
HK.1.94	LY.1149.91	1.13558e+06	20.115	15.9233	24.3953
HK.1.94	MA.G252.93	2.24307e+06	21.097	16.6965	25.2782
HK.1.94	NL.172.96	860030	19.714	15.5363	24.0248
HK.1.94	BE.353.89	902566	19.7837	15.4982	24.0688
HK.1.94	BE.32A.92	3.6605e+06	21.8036	17.6042	26.1985
HK.1.94	HK.34.90	1.23246e+06	20.2331	15.9793	24.5163
HK.1.94	BE.32B.92	3.91348e+06	21.9	17.5933	26.1173
HK.1.94	SD.9.93	3.14865e+07	24.9082	20.48	29.2076
HK.1.94	GD.25.93	1.15093e+07	23.4563	19.3435	27.9066
HK.1.94	JO.33.94	1.21626e+07	23.5359	19.1712	27.805
HK.1.94	FI.338.95	1.40393e+07	23.743	19.6378	28.1643
HK.1.94	LY.2279.95	2.88825e+06	21.4618	17.1883	25.7275
HK.1.94	NL.18.94	1.05857e+07	23.3356	19.1333	27.6643
HK.2.94	LY.1149.91	626084	19.256	14.7509	23.3036
HK.2.94	MA.G252.93	2.47323e+06	21.238	17.0192	25.5233
HK.2.94	NL.172.96	955639	19.8661	15.5073	24.2105
HK.2.94	BE.353.89	1.01581e+06	19.9542	15.6242	24.1774
HK.2.94	BE.32A.92	4.09917e+06	21.9669	17.6889	26.2264
HK.2.94	HK.34.90	1.81086e+06	20.7882	16.3847	24.8721
HK.2.94	BE.32B.92	4.37594e+06	22.0612	17.6524	26.2394
HK.2.94	SD.9.93	2.6614e+07	24.6657	20.1801	28.7009
HK.2.94	GD.25.93	7.44036e+06	22.8269	18.7307	27.403
HK.2.94	JO.33.94	5.06692e+06	22.2727	17.8659	26.5639
HK.2.94	FI.338.95	3.95033e+06	21.9135	17.7293	26.2332
HK.2.94	LY.2279.95	1.39647e+06	20.4134	16.3333	24.7924
HK.2.94	NL.18.94	7.06641e+06	22.7525	18.529	27.1334
HK.55.94	LY.1149.91	683087	19.3817	15.072	23.5197
HK.55.94	MA.G252.93	5.32173e+06	22.3435	17.9587	26.5457
HK.55.94	NL.1.95	9.95836e+06	23.2475	18.6798	27.3671
HK.55.94	NL.172.96	3.59503e+06	21.7776	17.633	26.0708
HK.55.94	BE.353.89	534787	19.0286	14.8276	23.3226
HK.55.94	BE.32A.92	6.69325e+06	22.6743	18.408	26.9265
HK.55.94	HK.34.90	2.03523e+06	20.9568	16.6817	25.0325
HK.55.94	BE.32B.92	4.6618e+06	22.1525	17.8884	26.4207
HK.55.94	SD.9.93	3.30217e+07	24.9769	20.6601	29.2858
HK.55.94	OS.2352.93	2.86521e+07	24.7721	20.4858	29.034
HK.55.94	PR.413.94	6.01147e+06	22.5193	18.2669	26.8338
HK.55.94	GD.25.93	1.65944e+07	23.9842	19.7038	28.1557
HK.55.94	JO.33.94	1.31606e+07	23.6497	19.4035	27.9329
HK.55.94	FI.338.95	8.40222e+06	23.0023	18.8107	27.3318
HK.55.94	LY.2279.95	1.02861e+07	23.2942	18.971	27.3788
HK.55.94	NL.18.94	6.99686e+07	26.0602	21.6926	30.3384
HK.56.94	LY.1149.91	1.04399e+06	19.9937	15.769	24.2725
HK.56.94	MA.G252.93	8.2064e+06	22.9683	18.7578	27.4094
HK.56.94	NL.172.96	3.17418e+06	21.598	17.0517	25.679
HK.56.94	BE.353.89	1.65052e+06	20.6545	16.397	24.8496
HK.56.94	BE.32A.92	1.22909e+07	23.5511	19.1248	27.684
[truncated: 1,970 more rows]
