# Supplementary material for: Bayesian inference of antigenic and non-antigenic variables from haemagglutination inhibition assays for influenza surveillance
Source: R Soc Open Sci. 2018 Jul 25;5(7):180113. doi: 10.1098/rsos.180113 (PMC6083687; doi:10.1098/rsos.180113)
Supplement: Supplementary Table S4 [file rsos180113supp5.xls]

## Sheet: Sheet1
	HK.1.68	EN.42.72	PC.1.73	SL.840.74	VI.3A.75	LE.360.86	TE.1A.77	BI.21793.72	BI.5930.74	AM.1609.77	BI.2461.78	RD.577.80	NL.209.80	NL.233.82	NL.241.82	NL.330.85	ST.10.85	NL.450.88	VI.2.90	LY.1149.91	MA.G252.93	NL.1.95	NL.218.95	NL.172.96	BA.1.79	PH.2.82	CC.4.85	WE.4.85	VI.7.87	SI.2.87	TE.1B.77	BA.2.79	EN.496.80	NL.333.85	CE.1A.84	CE.1B.84	CO.2.86	SH.11.87	NL.620.89	GU.54.89	BE.353.89	BE.32A.92	HK.34.90	BE.32B.92	SD.9.93	OS.2352.93	PR.413.94	GD.25.93	JO.33.94
BI.15793.68	354	501	109	NA	63	NA	NA	NA	NA	NA	NA	NA	NA	NA	NA	NA	NA	NA	NA	NA	NA	NA	NA	NA	NA	NA	NA	NA	NA	NA	NA	NA	NA	NA	NA	NA	NA	NA	NA	NA	NA	NA	NA	NA	NA	NA	NA	NA	NA
BI.16190.68	640	320	80	40	40	NA	NA	640	320	NA	NA	NA	NA	NA	NA	NA	NA	NA	NA	NA	NA	NA	NA	NA	NA	NA	NA	NA	NA	NA	NA	NA	NA	NA	NA	NA	NA	NA	NA	NA	NA	NA	NA	NA	NA	NA	NA	NA	NA
BI.16398.68	1163	1163	291	73	89	NA	NA	NA	NA	NA	NA	NA	NA	NA	NA	NA	NA	NA	NA	NA	NA	NA	NA	NA	NA	NA	NA	NA	NA	NA	35	NA	NA	NA	NA	NA	NA	NA	NA	NA	NA	NA	NA	NA	NA	NA	NA	NA	NA
BI.808.69	320	640	120	80	160	NA	NA	NA	NA	NA	NA	NA	NA	NA	NA	NA	NA	NA	NA	NA	NA	NA	NA	NA	NA	NA	NA	NA	NA	NA	NA	NA	NA	NA	NA	NA	NA	NA	NA	NA	NA	NA	NA	NA	NA	NA	NA	NA	NA
BI.908.69	1280	640	80	40	57	NA	NA	NA	NA	NA	NA	NA	NA	NA	NA	NA	NA	NA	NA	NA	NA	NA	NA	NA	NA	NA	NA	NA	NA	NA	60	NA	NA	NA	NA	NA	NA	NA	NA	NA	NA	NA	NA	NA	NA	NA	NA	NA	NA
BI.17938.69	554	453	113	42	46	NA	NA	NA	NA	NA	NA	NA	NA	NA	NA	NA	NA	NA	NA	NA	NA	NA	NA	NA	NA	NA	NA	NA	NA	NA	25	NA	NA	NA	NA	NA	NA	NA	NA	NA	NA	NA	NA	NA	NA	NA	NA	NA	NA
BI.93.70	1109	640	NA	57	46	NA	NA	NA	NA	NA	NA	NA	NA	NA	NA	NA	NA	NA	NA	NA	NA	NA	NA	NA	NA	NA	NA	NA	NA	NA	NA	NA	NA	NA	NA	NA	NA	NA	NA	NA	NA	NA	NA	NA	NA	NA	NA	NA	NA
BI.2668.70	320	320	80	24	46	NA	NA	NA	NA	NA	NA	NA	NA	NA	NA	NA	NA	NA	NA	NA	NA	NA	NA	NA	NA	NA	NA	NA	NA	NA	NA	NA	NA	NA	NA	NA	NA	NA	NA	NA	NA	NA	NA	NA	NA	NA	NA	NA	NA
BI.6449.71	165	392	57	NA	35	NA	NA	NA	NA	NA	NA	NA	NA	NA	NA	NA	NA	NA	NA	NA	NA	NA	NA	NA	NA	NA	NA	NA	NA	NA	NA	NA	NA	NA	NA	NA	NA	NA	NA	NA	NA	NA	NA	NA	NA	NA	NA	NA	NA
BI.21438.71	905	905	139	98	89	NA	NA	NA	NA	NA	NA	NA	NA	NA	NA	NA	NA	NA	NA	NA	NA	NA	NA	NA	NA	NA	NA	NA	NA	NA	40	NA	NA	NA	NA	NA	NA	NA	NA	NA	NA	NA	NA	NA	NA	NA	NA	NA	NA
BI.21801.71	905	905	160	98	87	NA	NA	NA	NA	NA	NA	NA	NA	NA	NA	NA	NA	NA	NA	NA	NA	NA	NA	NA	NA	NA	NA	NA	NA	NA	35	NA	NA	NA	NA	NA	NA	NA	NA	NA	NA	NA	NA	NA	NA	NA	NA	NA	NA
BI.6022.72	453	905	226	226	184	NA	NA	NA	NA	NA	NA	NA	NA	NA	NA	NA	NA	NA	NA	NA	NA	NA	NA	NA	NA	NA	NA	NA	NA	NA	80	NA	NA	NA	NA	NA	NA	NA	NA	NA	NA	NA	NA	NA	NA	NA	NA	NA	NA
BI.5168.76	NA	160	640	80	1280	NA	80	NA	NA	NA	NA	NA	NA	NA	NA	NA	NA	NA	NA	NA	NA	NA	NA	NA	NA	NA	NA	NA	NA	NA	NA	NA	NA	NA	NA	NA	NA	NA	NA	NA	NA	NA	NA	NA	NA	NA	NA	NA	NA
BI.4273.75	40	320	640	2560	40	NA	32	NA	NA	NA	NA	NA	NA	NA	NA	NA	NA	NA	NA	NA	NA	NA	NA	NA	NA	NA	NA	NA	NA	NA	NA	NA	NA	NA	NA	NA	NA	NA	NA	NA	NA	NA	NA	NA	NA	NA	NA	NA	NA
BI.334.75	NA	320	1280	160	160	NA	20	NA	NA	NA	NA	NA	NA	NA	NA	NA	NA	NA	NA	NA	NA	NA	NA	NA	NA	NA	NA	NA	NA	NA	NA	NA	NA	NA	NA	NA	NA	NA	NA	NA	NA	NA	NA	NA	NA	NA	NA	NA	NA
BI.1843.75	40	160	1280	160	160	NA	40	NA	NA	NA	NA	NA	NA	NA	NA	NA	NA	NA	NA	NA	NA	NA	NA	NA	NA	NA	NA	NA	NA	NA	NA	NA	NA	NA	NA	NA	NA	NA	NA	NA	NA	NA	NA	NA	NA	NA	NA	NA	NA
BI.21793.72	80	1280	1280	640	160	NA	40	1280	1280	NA	NA	NA	NA	NA	NA	NA	NA	NA	NA	NA	NA	NA	NA	NA	NA	NA	NA	NA	NA	NA	NA	NA	NA	NA	NA	NA	NA	NA	NA	NA	NA	NA	NA	NA	NA	NA	NA	NA	NA
BI.23290.72	80	640	640	320	226	NA	NA	NA	NA	NA	NA	NA	NA	NA	NA	NA	NA	NA	NA	NA	NA	NA	NA	NA	NA	NA	NA	NA	NA	NA	160	NA	NA	NA	NA	NA	NA	NA	NA	NA	NA	NA	NA	NA	NA	NA	NA	NA	NA
BI.23337.72	80	640	640	320	226	NA	NA	NA	NA	NA	NA	NA	NA	NA	NA	NA	NA	NA	NA	NA	NA	NA	NA	NA	NA	NA	NA	NA	NA	NA	160	NA	NA	NA	NA	NA	NA	NA	NA	NA	NA	NA	NA	NA	NA	NA	NA	NA	NA
BI.552.73	160	640	1280	640	226	NA	NA	NA	NA	20	20	NA	NA	NA	NA	NA	NA	NA	NA	NA	NA	NA	NA	NA	NA	NA	NA	NA	NA	NA	200	NA	NA	NA	NA	NA	20	NA	NA	NA	NA	NA	NA	NA	NA	NA	NA	NA	NA
BI.748.73	52	640	1280	291	135	NA	NA	NA	NA	NA	NA	NA	NA	NA	NA	NA	NA	NA	NA	NA	NA	NA	NA	NA	NA	NA	NA	NA	NA	NA	160	NA	NA	NA	NA	NA	NA	NA	NA	NA	NA	NA	NA	NA	NA	NA	NA	NA	NA
BI.3517.73	80	1280	1280	320	101	NA	NA	NA	NA	NA	NA	NA	NA	NA	NA	NA	NA	NA	NA	NA	NA	NA	NA	NA	NA	NA	NA	NA	NA	NA	160	NA	NA	NA	NA	NA	NA	NA	NA	NA	NA	NA	NA	NA	NA	NA	NA	NA	NA
BI.5146.74	40	320	640	640	80	NA	16	NA	NA	NA	NA	NA	NA	NA	NA	NA	NA	NA	NA	NA	NA	NA	NA	NA	NA	NA	NA	NA	NA	NA	NA	NA	NA	NA	NA	NA	NA	NA	NA	NA	NA	NA	NA	NA	NA	NA	NA	NA	NA
BI.5930.74	40	320	2560	160	160	NA	40	640	1280	NA	NA	NA	NA	NA	NA	NA	NA	NA	NA	NA	NA	NA	NA	NA	NA	NA	NA	NA	NA	NA	NA	NA	NA	NA	NA	NA	NA	NA	NA	NA	NA	NA	NA	NA	NA	NA	NA	NA	NA
BI.5931.74	16	291	905	80	320	NA	24	NA	NA	NA	NA	NA	NA	NA	NA	NA	NA	NA	NA	NA	NA	NA	NA	NA	NA	NA	NA	NA	NA	NA	NA	NA	NA	NA	NA	NA	NA	NA	NA	NA	NA	NA	NA	NA	NA	NA	NA	NA	NA
BI.7398.74	20	320	2560	320	80	NA	20	NA	NA	NA	NA	NA	NA	NA	NA	NA	NA	NA	NA	NA	NA	NA	NA	NA	NA	NA	NA	NA	NA	NA	NA	NA	NA	NA	NA	NA	NA	NA	NA	NA	NA	NA	NA	NA	NA	NA	NA	NA	NA
BI.9459.74	60	392	2560	320	254	NA	NA	NA	NA	20	NA	NA	NA	NA	NA	NA	NA	NA	NA	NA	NA	NA	NA	NA	NA	NA	NA	NA	NA	NA	160	NA	NA	NA	NA	NA	20	NA	NA	NA	NA	NA	NA	NA	NA	NA	NA	NA	NA
BI.2600.75	80	320	1280	2560	40	NA	40	NA	NA	NA	NA	NA	NA	NA	NA	NA	NA	NA	NA	NA	NA	NA	NA	NA	NA	NA	NA	NA	NA	NA	NA	NA	NA	NA	NA	NA	NA	NA	NA	NA	NA	NA	NA	NA	NA	NA	NA	NA	NA
BI.2813.75	40	320	1280	160	80	NA	80	320	1280	NA	NA	NA	NA	NA	NA	NA	NA	NA	NA	NA	NA	NA	NA	NA	NA	NA	NA	NA	NA	NA	NA	NA	NA	NA	NA	NA	NA	NA	NA	NA	NA	NA	NA	NA	NA	NA	NA	NA	NA
BI.628.76	NA	120	320	80	80	NA	1280	NA	NA	NA	NA	NA	NA	NA	NA	480	NA	NA	NA	NA	NA	NA	NA	NA	40	240	NA	480	NA	NA	NA	NA	480	NA	NA	NA	NA	NA	NA	NA	NA	NA	NA	NA	NA	NA	NA	NA	NA
BI.1761.76	NA	320	320	160	1016	NA	80	NA	NA	1280	80	NA	NA	NA	NA	80	80	NA	NA	NA	NA	NA	NA	NA	NA	80	NA	160	NA	NA	320	NA	NA	NA	NA	20	320	NA	NA	NA	NA	NA	NA	NA	NA	NA	NA	NA	NA
BI.2271.76	NA	120	640	160	160	NA	2032	NA	NA	NA	NA	NA	NA	NA	NA	640	NA	NA	NA	NA	NA	NA	NA	NA	80	320	NA	640	NA	NA	NA	NA	480	NA	NA	NA	NA	NA	NA	NA	NA	NA	NA	NA	NA	NA	NA	NA	NA
BI.5029.76	NA	160	160	40	905	NA	80	NA	NA	1280	80	NA	NA	NA	NA	NA	80	NA	NA	NA	NA	NA	NA	NA	NA	NA	NA	160	NA	NA	320	100	NA	NA	NA	NA	320	NA	NA	NA	NA	NA	NA	NA	NA	NA	NA	NA	NA
BI.5657.76	NA	160	320	80	905	NA	98	NA	NA	1280	80	NA	NA	NA	NA	NA	80	NA	NA	NA	NA	NA	NA	NA	NA	NA	NA	200	NA	NA	320	160	NA	NA	NA	20	240	NA	NA	NA	NA	NA	NA	NA	NA	NA	NA	NA	NA
BI.6545.76	NA	210	320	80	905	80	61	NA	NA	1600	80	NA	NA	NA	NA	80	80	NA	NA	NA	NA	NA	NA	NA	NA	80	40	113	NA	NA	320	100	NA	NA	NA	20	320	NA	NA	NA	NA	NA	NA	NA	NA	NA	NA	NA	NA
AM.1609.77	10	320	320	80	2560	NA	105	160	640	2560	NA	NA	320	80	320	139	160	NA	NA	NA	NA	NA	NA	NA	NA	160	NA	160	NA	NA	NA	NA	80	NA	NA	NA	NA	NA	NA	NA	NA	NA	NA	NA	NA	NA	NA	NA	NA
BI.3895.77	10	320	320	160	1016	NA	77	NA	NA	1280	80	NA	NA	NA	NA	120	80	NA	NA	NA	NA	NA	NA	NA	NA	120	NA	160	NA	NA	320	160	NA	NA	NA	20	320	NA	NA	NA	NA	NA	NA	NA	NA	NA	NA	NA	NA
RD.5828.77	60	320	320	320	905	NA	179	NA	NA	1280	70	NA	NA	NA	NA	NA	20	NA	NA	NA	NA	NA	NA	NA	NA	NA	NA	40	20	NA	120	20	NA	NA	NA	20	40	NA	NA	NA	NA	NA	NA	NA	NA	NA	NA	NA	NA
RD.8179.77	40	320	640	160	1197	NA	126	NA	NA	2560	100	NA	NA	NA	NA	NA	80	NA	NA	NA	NA	NA	NA	NA	NA	NA	NA	160	NA	NA	320	80	NA	NA	NA	NA	320	NA	NA	NA	NA	NA	NA	NA	NA	NA	NA	NA	NA
NL.209.80	NA	15	NA	NA	57	640	421	NA	80	226	3620	5120	2560	1280	2560	1016	1431	NA	NA	NA	NA	NA	NA	NA	302	844	960	1280	25	80	2560	1016	NA	NA	NA	240	10240	NA	NA	NA	20	NA	NA	NA	NA	NA	NA	NA	NA
RD.577.80	NA	10	NA	NA	53	960	716	NA	80	320	2449	2560	5120	2560	2560	1016	1280	NA	NA	NA	NA	NA	NA	NA	226	842	1120	972	28	80	2560	905	2032	NA	NA	179	8095	NA	NA	NA	NA	NA	NA	NA	NA	NA	NA	NA	NA
NL.233.82	NA	NA	NA	NA	20	NA	NA	NA	NA	226	905	1280	1280	2560	5120	2560	905	40	NA	NA	NA	NA	NA	NA	NA	NA	NA	960	40	NA	640	640	640	NA	NA	120	2560	NA	NA	NA	20	NA	NA	NA	NA	NA	NA	NA	NA
NL.241.82	NA	NA	NA	NA	40	NA	200	NA	NA	172	972	640	2560	1280	2560	1280	1280	80	NA	NA	NA	NA	NA	NA	NA	NA	NA	1280	40	NA	1280	1120	1280	NA	NA	113	3620	NA	NA	NA	35	NA	NA	NA	NA	NA	NA	NA	NA
NL.330.85	NA	NA	NA	NA	20	NA	160	NA	NA	NA	441	320	640	320	1280	1810	1431	320	NA	NA	NA	NA	NA	NA	40	1280	NA	2395	113	NA	320	640	506	NA	NA	277	8868	NA	NA	NA	25	NA	NA	NA	NA	NA	NA	NA	NA
ST.10.85	NA	NA	NA	NA	40	NA	NA	NA	NA	NA	358	320	640	320	2560	2560	3620	640	NA	80	NA	NA	NA	NA	NA	NA	NA	2560	640	NA	320	640	320	NA	NA	400	8960	NA	NA	NA	160	NA	NA	NA	NA	NA	NA	NA	NA
CO.2.86	NA	NA	NA	NA	28	2560	160	NA	NA	NA	226	320	640	320	2560	1280	3620	1280	NA	80	NA	NA	NA	NA	34	571	640	2382	318	120	400	960	386	640	NA	100	10240	NA	NA	NA	160	NA	NA	NA	NA	NA	NA	NA	NA
NL.450.88	NA	NA	NA	NA	20	NA	52	NA	NA	NA	NA	NA	NA	NA	NA	556	1280	5653	1076	320	NA	NA	NA	NA	18	65	NA	2774	890	2792	120	160	NA	NA	NA	140	4661	7760	10240	10240	345	NA	NA	NA	NA	NA	NA	NA	NA
NL.620.89	NA	NA	NA	NA	20	NA	NA	NA	NA	NA	NA	NA	NA	NA	NA	453	905	2560	320	640	NA	NA	NA	NA	NA	NA	NA	2217	1280	1280	20	40	NA	NA	NA	40	2560	10240	20480	10240	400	NA	NA	NA	NA	NA	NA	NA	NA
VI.2.90	NA	NA	NA	NA	NA	NA	NA	NA	NA	NA	NA	NA	NA	NA	NA	NA	640	508	1940	1810	NA	NA	NA	20	NA	NA	NA	320	1280	160	NA	NA	NA	NA	NA	NA	640	211	3378	320	1280	80	NA	NA	NA	NA	NA	NA	NA
LY.1149.91	NA	NA	NA	NA	NA	NA	NA	NA	NA	NA	NA	NA	NA	NA	NA	NA	640	202	1016	2560	NA	NA	NA	NA	NA	NA	NA	160	NA	80	NA	NA	NA	NA	NA	NA	320	80	1280	NA	640	NA	71	40	NA	80	320	NA	NA
MA.G102.93	NA	NA	NA	NA	NA	NA	NA	NA	NA	NA	NA	NA	NA	NA	NA	NA	NA	57	NA	NA	101	1993	467	121	NA	NA	NA	NA	NA	40	NA	NA	NA	NA	NA	NA	NA	80	320	NA	65	626	444	305	2551	1522	320	160	718
MA.G252.93	NA	NA	NA	NA	NA	NA	NA	NA	NA	NA	NA	NA	NA	NA	NA	NA	NA	40	NA	29	1076	160	320	339	NA	NA	NA	NA	NA	NA	NA	NA	NA	NA	NA	NA	NA	NA	NA	NA	80	68	50	NA	233	80	640	309	338
NL.241.93	NA	NA	NA	NA	NA	NA	NA	NA	NA	NA	NA	NA	NA	NA	NA	NA	NA	40	NA	48	453	3836	2032	202	NA	NA	NA	NA	NA	NA	NA	NA	NA	NA	NA	NA	NA	NA	NA	NA	78	320	335	160	2032	1884	1810	1280	NA
NL.1.95	NA	NA	NA	NA	NA	NA	NA	NA	NA	NA	NA	NA	NA	NA	NA	NA	NA	NA	NA	74	453	4318	3342	NA	NA	NA	NA	NA	NA	NA	NA	NA	NA	NA	NA	NA	NA	NA	NA	NA	NA	NA	320	NA	1260	1301	1280	1402	1483
WE.4.85	NA	NA	NA	NA	20	1920	139	NA	NA	NA	NA	NA	NA	NA	NA	905	NA	1280	NA	NA	NA	NA	NA	NA	50	557	640	2153	554	320	NA	NA	333	640	NA	NA	NA	NA	NA	NA	NA	NA	NA	NA	NA	NA	NA	NA	NA
OK.5.88	NA	NA	NA	NA	NA	NA	36	NA	NA	NA	NA	NA	NA	NA	NA	243	NA	905	NA	NA	NA	NA	NA	NA	20	46	NA	254	1114	422	NA	NA	80	NA	NA	NA	640	806	2560	80	NA	NA	NA	NA	NA	NA	NA	NA	NA
SI.2.87	NA	NA	NA	NA	NA	160	35	NA	NA	NA	NA	NA	NA	NA	NA	277	NA	3225	40	NA	NA	NA	NA	NA	NA	49	NA	NA	NA	1824	240	NA	30	NA	NA	NA	320	3620	640	905	247	NA	NA	NA	NA	NA	NA	NA	NA
VI.7.87	NA	NA	NA	NA	NA	NA	46	NA	NA	NA	NA	NA	NA	NA	NA	325	NA	1114	NA	NA	NA	NA	NA	NA	20	43	NA	470	1437	211	NA	NA	77	NA	NA	NA	NA	806	NA	NA	NA	NA	NA	NA	NA	NA	NA	NA	NA
AL.4382.82	NA	NA	NA	NA	NA	NA	NA	NA	NA	NA	NA	NA	NA	NA	NA	NA	NA	1280	NA	NA	NA	NA	NA	NA	1280	5120	NA	5120	NA	NA	10240	2560	5120	NA	NA	NA	NA	NA	NA	NA	NA	NA	NA	NA	NA	NA	NA	NA	NA
LY.2380.81	NA	NA	NA	NA	NA	NA	NA	NA	NA	NA	NA	NA	NA	NA	NA	NA	NA	2560	NA	NA	NA	NA	NA	NA	1280	2560	NA	5120	NA	NA	5120	2560	5120	NA	NA	NA	NA	NA	NA	NA	NA	NA	NA	NA	NA	NA	NA	NA	NA
BI.4791.81	NA	NA	NA	NA	NA	NA	640	NA	NA	NA	NA	NA	NA	NA	NA	NA	NA	1280	NA	NA	NA	NA	NA	NA	453	905	NA	2560	NA	NA	2560	1280	1810	NA	NA	NA	NA	NA	NA	NA	NA	NA	NA	NA	NA	NA	NA	NA	NA
BI.10684.82	NA	NA	NA	NA	NA	NA	1280	NA	NA	NA	NA	NA	NA	NA	NA	NA	NA	640	NA	NA	NA	NA	NA	NA	453	1280	NA	2560	NA	NA	2560	905	3620	NA	NA	NA	NA	NA	NA	NA	NA	NA	NA	NA	NA	NA	NA	NA	NA
OS.13676.83	NA	NA	NA	NA	NA	NA	NA	NA	NA	NA	NA	NA	NA	NA	NA	NA	NA	1280	NA	NA	NA	NA	NA	NA	640	2560	NA	2560	NA	NA	2560	1280	5120	NA	NA	NA	NA	NA	NA	NA	NA	NA	NA	NA	NA	NA	NA	NA	NA
NL.333.85	NA	NA	NA	NA	NA	320	320	NA	NA	NA	NA	NA	NA	NA	160	NA	NA	1280	NA	NA	NA	NA	NA	NA	40	160	NA	2560	NA	NA	1280	NA	NA	1280	1280	320	NA	NA	NA	NA	NA	NA	NA	NA	NA	NA	NA	NA	NA
BA.1.79	NA	NA	NA	NA	NA	226	320	NA	NA	NA	NA	NA	NA	NA	1280	640	NA	320	NA	NA	NA	NA	NA	NA	640	905	NA	1055	NA	40	1280	NA	1280	320	640	80	NA	40	NA	NA	NA	NA	NA	NA	NA	NA	NA	NA	NA
PH.2.82	NA	NA	NA	NA	NA	226	NA	NA	NA	NA	NA	NA	NA	NA	2560	784	NA	320	NA	NA	NA	NA	NA	NA	NA	NA	NA	462	NA	190	640	NA	196	640	640	40	NA	80	NA	NA	NA	NA	NA	NA	NA	NA	NA	NA	NA
CE.1.84	NA	NA	NA	NA	NA	320	320	NA	NA	NA	NA	NA	NA	NA	NA	NA	NA	640	NA	NA	NA	NA	NA	NA	40	160	NA	NA	NA	NA	NA	NA	NA	1280	1280	640	NA	NA	NA	NA	NA	NA	NA	NA	NA	NA	NA	NA	NA
LE.360.86	NA	NA	NA	NA	NA	640	113	NA	NA	NA	NA	NA	NA	NA	160	453	NA	905	NA	NA	NA	NA	NA	NA	NA	320	NA	1786	160	57	NA	NA	160	320	160	40	NA	320	NA	80	NA	NA	NA	NA	NA	NA	NA	NA	NA
VI.1.88	NA	NA	NA	NA	NA	NA	40	NA	NA	NA	NA	NA	NA	NA	NA	557	NA	1280	NA	NA	NA	NA	NA	NA	NA	80	NA	508	1470	453	NA	NA	160	NA	NA	NA	640	1280	2560	80	NA	NA	NA	NA	NA	NA	NA	NA	NA
CC.2.88	NA	NA	NA	NA	NA	NA	20	NA	NA	NA	NA	NA	NA	NA	NA	1016	NA	1280	NA	NA	NA	NA	NA	NA	NA	640	NA	5120	320	40	NA	NA	160	NA	NA	NA	NA	NA	NA	NA	NA	NA	NA	NA	NA	NA	NA	NA	NA
ST.12.88	NA	NA	NA	NA	NA	NA	40	NA	NA	NA	NA	NA	NA	NA	NA	403	NA	NA	1280	NA	NA	NA	NA	NA	40	40	NA	NA	1016	4064	NA	NA	80	NA	NA	NA	5120	10240	10240	10240	320	NA	NA	NA	NA	NA	NA	NA	NA
EN.138.89	NA	NA	NA	NA	NA	NA	NA	NA	NA	NA	NA	NA	NA	NA	NA	320	NA	4457	640	NA	NA	NA	NA	NA	NA	NA	NA	1832	905	1114	NA	NA	NA	NA	NA	NA	640	10240	10240	NA	320	NA	NA	NA	NA	NA	NA	NA	NA
EI.3447.89	NA	NA	NA	NA	NA	NA	NA	NA	NA	NA	NA	NA	NA	NA	NA	160	NA	NA	NA	NA	NA	NA	NA	NA	NA	NA	NA	NA	NA	1613	NA	NA	NA	NA	NA	NA	2560	5120	10240	5120	NA	NA	NA	NA	NA	NA	NA	NA	NA
EN.427.88	NA	NA	NA	NA	NA	NA	NA	NA	NA	NA	NA	NA	NA	NA	NA	320	NA	2560	NA	NA	NA	NA	NA	NA	NA	NA	NA	1280	640	2560	NA	NA	NA	NA	NA	NA	NA	NA	NA	NA	NA	NA	NA	NA	NA	NA	NA	NA	NA
GE.5007.89	NA	NA	NA	NA	NA	NA	NA	NA	NA	NA	NA	NA	NA	NA	NA	320	NA	4064	NA	NA	NA	NA	NA	NA	NA	NA	NA	2032	905	1280	NA	NA	NA	NA	NA	NA	2560	5120	10240	10240	NA	NA	NA	NA	NA	NA	NA	NA	NA
WE.3.90	NA	NA	NA	NA	NA	NA	NA	NA	NA	NA	NA	NA	NA	NA	NA	40	NA	640	1280	NA	NA	NA	NA	18	NA	NA	NA	160	640	160	NA	NA	NA	NA	NA	NA	640	320	2560	320	320	NA	NA	NA	70	NA	NA	NA	20
WK.1.89	NA	NA	NA	NA	NA	NA	NA	NA	NA	NA	NA	NA	NA	NA	NA	160	NA	2560	NA	NA	NA	NA	NA	NA	NA	NA	NA	1280	453	508	NA	NA	NA	NA	NA	NA	1280	4064	10240	5120	NA	NA	NA	NA	NA	NA	NA	NA	NA
AT.3572DASH5.88	NA	NA	NA	NA	NA	NA	NA	NA	NA	NA	NA	NA	NA	NA	NA	320	NA	10240	NA	NA	NA	NA	NA	NA	NA	NA	NA	5120	1280	2560	NA	NA	NA	NA	NA	NA	5120	10240	10240	NA	NA	NA	NA	NA	NA	NA	NA	NA	NA
SH.11.87	NA	NA	NA	NA	NA	80	NA	NA	NA	NA	NA	NA	NA	NA	NA	160	NA	3880	160	NA	NA	NA	NA	NA	NA	NA	NA	970	320	905	NA	NA	NA	NA	NA	NA	320	1613	640	NA	67	NA	NA	NA	NA	NA	NA	NA	NA
GU.54.89	NA	NA	NA	NA	NA	80	NA	NA	NA	NA	NA	NA	NA	NA	NA	160	NA	1280	160	NA	NA	NA	NA	NA	NA	NA	NA	640	80	557	120	NA	NA	NA	NA	NA	160	NA	640	NA	80	NA	NA	NA	NA	NA	NA	NA	40
HK.1.89	NA	NA	NA	NA	NA	NA	NA	NA	NA	NA	NA	NA	NA	NA	NA	320	NA	5120	640	NA	NA	NA	NA	NA	NA	NA	NA	2560	905	1280	NA	NA	NA	NA	NA	NA	2560	5881	11763	10240	320	NA	NA	NA	NA	NA	NA	NA	NA
NL.650.89	NA	NA	NA	NA	NA	NA	NA	NA	NA	NA	NA	NA	NA	NA	NA	160	NA	1280	NA	NA	NA	NA	NA	NA	NA	NA	NA	1016	80	640	NA	NA	NA	NA	NA	NA	320	5120	5120	10240	NA	NA	NA	NA	NA	NA	NA	NA	NA
NL.738.89	NA	NA	NA	NA	NA	NA	NA	NA	NA	NA	NA	NA	NA	NA	NA	113	NA	1280	NA	NA	NA	NA	NA	NA	NA	NA	NA	640	28	320	NA	NA	NA	NA	NA	NA	254	5120	5120	2560	NA	NA	NA	NA	NA	NA	NA	NA	NA
SP.35.89	NA	NA	NA	NA	NA	NA	NA	NA	NA	NA	NA	NA	NA	NA	NA	160	NA	2229	640	NA	NA	NA	NA	NA	NA	NA	NA	1280	453	557	NA	NA	NA	NA	NA	NA	2229	2560	10240	5120	320	NA	NA	NA	NA	NA	NA	NA	NA
SP.40.89	NA	NA	NA	NA	NA	NA	NA	NA	NA	NA	NA	NA	NA	NA	NA	160	NA	1280	NA	NA	NA	NA	NA	NA	NA	NA	NA	403	1810	320	NA	NA	NA	NA	NA	NA	806	2560	6451	2560	NA	NA	NA	NA	NA	NA	NA	NA	NA
WE.5.89	NA	NA	NA	NA	NA	NA	NA	NA	NA	NA	NA	NA	NA	NA	NA	NA	NA	2560	NA	NA	NA	NA	NA	NA	NA	NA	NA	508	453	NA	NA	NA	NA	NA	NA	NA	508	3225	3225	1280	NA	NA	NA	NA	NA	NA	NA	NA	NA
ME.2.90	NA	NA	NA	NA	NA	NA	NA	NA	NA	NA	NA	NA	NA	NA	NA	160	NA	5120	320	NA	NA	NA	NA	NA	NA	NA	NA	1280	905	NA	NA	NA	NA	NA	NA	NA	NA	10240	10240	10240	160	NA	NA	NA	NA	NA	NA	NA	NA
SU.1.90	NA	NA	NA	NA	NA	NA	NA	NA	NA	NA	NA	NA	NA	NA	NA	320	NA	5120	NA	NA	NA	NA	NA	NA	NA	NA	NA	2560	1280	1280	NA	NA	NA	NA	NA	NA	2560	5120	10240	10240	NA	NA	NA	NA	NA	NA	NA	NA	NA
VI.33.92	NA	NA	NA	NA	NA	NA	NA	NA	NA	NA	NA	NA	NA	NA	NA	NA	NA	905	2560	NA	NA	NA	NA	10	NA	NA	NA	320	NA	226	NA	NA	NA	NA	NA	NA	1280	320	3620	NA	1810	NA	NA	NA	40	NA	NA	NA	30
NL.891.91	NA	NA	NA	NA	NA	NA	NA	NA	NA	NA	NA	NA	NA	NA	NA	NA	NA	640	2560	NA	NA	NA	NA	15	NA	NA	NA	320	NA	113	NA	NA	NA	NA	NA	NA	640	160	3620	NA	1280	NA	NA	NA	40	NA	NA	NA	20
CA.1.91	NA	NA	NA	NA	NA	NA	NA	NA	NA	NA	NA	NA	NA	NA	NA	NA	NA	7241	640	NA	NA	NA	NA	NA	NA	NA	NA	3620	NA	1280	NA	NA	NA	NA	NA	NA	3620	7241	10240	NA	453	NA	NA	NA	NA	NA	NA	NA	NA
EN.260.91	NA	NA	NA	NA	NA	NA	NA	NA	NA	NA	NA	NA	NA	NA	NA	NA	NA	640	2560	NA	NA	NA	NA	15	NA	NA	NA	320	NA	113	NA	NA	NA	NA	NA	NA	1280	160	3620	NA	1280	NA	NA	NA	40	NA	NA	NA	NA
EN.261.91	NA	NA	NA	NA	NA	NA	NA	NA	NA	NA	NA	NA	NA	NA	NA	NA	NA	320	1016	NA	NA	NA	NA	25	NA	NA	NA	127	NA	40	NA	NA	NA	NA	NA	NA	403	101	1613	NA	640	NA	NA	NA	160	NA	NA	NA	120
MA.G12.91	NA	NA	NA	NA	NA	NA	NA	NA	NA	NA	NA	NA	NA	NA	NA	NA	NA	403	2560	NA	NA	NA	NA	10	NA	NA	NA	320	NA	160	NA	NA	NA	NA	NA	NA	640	160	4064	NA	1280	NA	NA	NA	40	NA	NA	NA	NA
NL.816.91	NA	NA	NA	NA	NA	NA	NA	NA	NA	NA	NA	NA	NA	NA	NA	NA	NA	1280	2560	NA	NA	NA	NA	10	NA	NA	NA	320	NA	80	NA	NA	NA	NA	NA	NA	640	80	2560	NA	1280	NA	NA	NA	40	NA	NA	NA	NA
AM.4112.92	NA	NA	NA	NA	NA	NA	NA	NA	NA	NA	NA	NA	NA	NA	NA	NA	NA	1280	2560	NA	NA	NA	NA	20	NA	NA	NA	320	NA	80	NA	NA	NA	NA	NA	NA	1280	160	5120	NA	1280	NA	NA	NA	60	NA	NA	NA	20
ES.1285.92	NA	NA	NA	NA	NA	NA	NA	NA	NA	NA	NA	NA	NA	NA	NA	NA	NA	320	2560	NA	NA	NA	NA	15	NA	NA	NA	160	NA	80	NA	NA	NA	NA	NA	NA	640	160	5120	NA	640	NA	NA	NA	35	NA	NA	NA	NA
FI.220.92	NA	NA	NA	NA	NA	NA	NA	NA	NA	NA	NA	NA	NA	NA	NA	NA	NA	160	640	NA	NA	NA	NA	10	NA	NA	NA	40	NA	80	NA	NA	NA	NA	NA	NA	160	80	640	NA	403	NA	NA	NA	40	NA	NA	NA	20
MA.G58.92	NA	NA	NA	NA	NA	NA	NA	NA	NA	NA	NA	NA	NA	NA	NA	NA	NA	640	1280	NA	NA	NA	NA	20	NA	NA	NA	160	NA	80	NA	NA	NA	NA	NA	NA	1280	160	2560	NA	640	NA	NA	NA	80	NA	NA	NA	40
NI.3129.92	NA	NA	NA	NA	NA	NA	NA	NA	NA	NA	NA	NA	NA	NA	NA	NA	NA	640	2560	NA	NA	NA	NA	10	NA	NA	NA	320	NA	80	NA	NA	NA	NA	NA	NA	640	160	2560	NA	1280	NA	NA	NA	40	NA	NA	NA	20
NL.819.92	NA	NA	NA	NA	NA	NA	NA	NA	NA	NA	NA	NA	NA	NA	NA	NA	NA	640	1280	NA	NA	NA	NA	30	NA	NA	NA	320	NA	80	NA	NA	NA	NA	NA	NA	640	80	2560	NA	1280	NA	NA	NA	60	NA	NA	NA	15
NL.935.92	NA	NA	NA	NA	NA	NA	NA	NA	NA	NA	NA	NA	NA	NA	NA	NA	NA	1280	5120	NA	NA	NA	NA	20	NA	NA	NA	320	NA	80	NA	NA	NA	NA	NA	NA	1280	320	5120	NA	2560	NA	NA	NA	40	NA	NA	NA	15
PA.583.92	NA	NA	NA	NA	NA	NA	NA	NA	NA	NA	NA	NA	NA	NA	NA	NA	NA	403	2560	NA	NA	NA	NA	10	NA	NA	NA	202	NA	50	NA	NA	NA	NA	NA	NA	403	101	2560	NA	806	NA	NA	NA	20	NA	NA	NA	NA
PA.614.92	NA	NA	NA	NA	NA	NA	NA	NA	NA	NA	NA	NA	NA	NA	NA	NA	NA	640	1280	NA	NA	NA	NA	20	NA	NA	NA	320	NA	80	NA	NA	NA	NA	NA	NA	640	160	2560	NA	640	NA	NA	NA	40	NA	NA	NA	NA
SA.8.92	NA	NA	NA	NA	NA	NA	NA	NA	NA	NA	NA	NA	NA	NA	NA	NA	NA	226	905	NA	NA	NA	NA	10	NA	NA	NA	57	NA	57	NA	NA	NA	NA	NA	NA	320	113	905	NA	453	NA	NA	NA	20	NA	NA	NA	NA
SA.23.92	NA	NA	NA	NA	NA	NA	NA	NA	NA	NA	NA	NA	NA	NA	NA	NA	NA	320	1280	NA	NA	NA	NA	10	NA	NA	NA	80	NA	160	NA	NA	NA	NA	NA	NA	320	160	640	NA	640	NA	NA	NA	10	NA	NA	NA	NA
SA.27.92	NA	NA	NA	NA	NA	NA	NA	NA	NA	NA	NA	NA	NA	NA	NA	NA	NA	160	640	NA	NA	NA	NA	20	NA	NA	NA	80	NA	80	NA	NA	NA	NA	NA	NA	160	80	640	NA	640	NA	NA	NA	20	NA	NA	NA	20
ST.7.92	NA	NA	NA	NA	NA	NA	NA	NA	NA	NA	NA	NA	NA	NA	NA	NA	NA	320	1280	NA	NA	NA	NA	NA	NA	NA	NA	160	NA	80	NA	NA	NA	NA	NA	NA	640	160	5120	NA	640	NA	NA	NA	20	NA	NA	NA	NA
VI.68.92	NA	NA	NA	NA	NA	NA	NA	NA	NA	NA	NA	NA	NA	NA	NA	NA	NA	640	5120	NA	NA	NA	NA	NA	NA	NA	NA	640	NA	320	NA	NA	NA	NA	NA	NA	640	640	1280	NA	5120	NA	NA	NA	NA	NA	NA	NA	NA
GE.5366.91	NA	NA	NA	NA	NA	NA	NA	NA	NA	NA	NA	NA	NA	NA	NA	NA	NA	2560	320	NA	NA	NA	NA	NA	NA	NA	NA	1280	NA	640	NA	NA	NA	NA	NA	NA	2560	5120	5120	NA	320	NA	NA	NA	NA	NA	NA	NA	NA
BE.353.89	NA	NA	NA	NA	NA	80	NA	NA	NA	NA	NA	NA	NA	NA	NA	NA	80	320	640	458	NA	NA	NA	NA	NA	NA	NA	226	480	120	NA	20	NA	NA	NA	NA	320	139	1280	80	1488	14	229	53	NA	NA	NA	NA	NA
LY.1182.91	NA	NA	NA	NA	NA	NA	NA	NA	NA	NA	NA	NA	NA	NA	NA	NA	NA	320	1280	2560	NA	NA	NA	40	NA	NA	NA	160	NA	67	NA	NA	NA	NA	NA	NA	320	67	1280	NA	1076	20	NA	NA	80	NA	NA	NA	40
BE.352.89	NA	NA	NA	NA	NA	NA	NA	NA	NA	NA	NA	NA	NA	NA	NA	NA	NA	320	480	1280	40	NA	NA	10	NA	NA	NA	160	NA	120	NA	NA	NA	NA	NA	NA	480	240	1280	NA	2334	40	640	80	80	NA	NA	NA	60
PA.467.92	NA	NA	NA	NA	NA	NA	NA	NA	NA	NA	NA	NA	NA	NA	NA	NA	NA	905	2560	NA	NA	NA	NA	10	NA	NA	NA	640	NA	113	NA	NA	NA	NA	NA	NA	1280	113	5120	NA	1280	NA	NA	NA	30	NA	NA	NA	NA
TI.5957.92	NA	NA	NA	NA	NA	NA	NA	NA	NA	NA	NA	NA	NA	NA	NA	NA	NA	640	2560	NA	NA	NA	NA	15	NA	NA	NA	320	NA	113	NA	NA	NA	NA	NA	NA	905	160	3620	NA	1280	NA	NA	NA	40	NA	NA	NA	15
AT.211.89	NA	NA	NA	NA	NA	NA	NA	NA	NA	NA	NA	NA	NA	NA	NA	160	NA	2560	NA	NA	NA	NA	NA	NA	NA	NA	NA	1280	2560	320	NA	NA	NA	NA	NA	NA	1280	2560	10240	NA	NA	NA	NA	NA	NA	NA	NA	NA	NA
SP.34.89	NA	NA	NA	NA	NA	NA	NA	NA	NA	NA	NA	NA	NA	NA	NA	160	NA	1280	NA	NA	NA	NA	NA	NA	NA	NA	NA	1280	160	320	NA	NA	NA	NA	NA	NA	640	2560	10240	NA	NA	NA	NA	NA	NA	NA	NA	NA	NA
SP.36.89	NA	NA	NA	NA	NA	NA	NA	NA	NA	NA	NA	NA	NA	NA	NA	160	NA	640	NA	NA	NA	NA	NA	NA	NA	NA	NA	640	320	320	NA	NA	NA	NA	NA	NA	640	2560	5120	NA	NA	NA	NA	NA	NA	NA	NA	NA	NA
SP.53.89	NA	NA	NA	NA	NA	NA	NA	NA	NA	NA	NA	NA	NA	NA	NA	320	NA	2560	NA	NA	NA	NA	NA	NA	NA	NA	NA	640	640	2560	NA	NA	NA	NA	NA	NA	2560	2560	10240	NA	NA	NA	NA	NA	NA	NA	NA	NA	NA
VI.1.89	NA	NA	NA	NA	NA	NA	NA	NA	NA	NA	NA	NA	NA	NA	NA	160	NA	320	NA	NA	NA	NA	NA	NA	NA	NA	NA	320	40	320	NA	NA	NA	NA	NA	NA	320	5120	640	NA	NA	NA	NA	NA	NA	NA	NA	NA	NA
ME.5.90	NA	NA	NA	NA	NA	NA	NA	NA	NA	NA	NA	NA	NA	NA	NA	160	NA	2560	NA	NA	NA	NA	NA	NA	NA	NA	NA	2560	1280	320	NA	NA	NA	NA	NA	NA	5120	5120	10240	NA	NA	NA	NA	NA	NA	NA	NA	NA	NA
SH.24.90	NA	NA	NA	NA	NA	NA	NA	NA	NA	NA	NA	NA	NA	NA	NA	NA	NA	320	NA	80	40	NA	NA	18	NA	NA	NA	NA	NA	160	NA	NA	NA	NA	NA	NA	NA	5120	1280	NA	160	320	10240	640	277	NA	NA	20	35
BE.32.92	NA	NA	NA	NA	NA	NA	NA	NA	NA	NA	NA	NA	NA	NA	NA	NA	NA	80	NA	55	40	73	48	48	NA	NA	NA	NA	NA	NA	NA	NA	NA	NA	NA	NA	NA	NA	160	40	79	735	10240	905	320	NA	NA	96	97
FI.247.92	NA	NA	NA	NA	NA	NA	NA	NA	NA	NA	NA	NA	NA	NA	NA	NA	NA	40	NA	NA	80	NA	NA	NA	NA	NA	NA	NA	NA	20	NA	NA	NA	NA	NA	NA	NA	NA	160	NA	40	640	640	160	1280	NA	NA	NA	NA
NL.938.92	NA	NA	NA	NA	NA	NA	NA	NA	NA	NA	NA	NA	NA	NA	NA	NA	NA	640	NA	127	20	NA	NA	70	NA	NA	NA	NA	NA	80	NA	NA	NA	NA	NA	NA	NA	5120	1280	NA	127	479	6451	640	733	NA	NA	100	140
SE.C273.92	NA	NA	NA	NA	NA	NA	NA	NA	NA	NA	NA	NA	NA	NA	NA	NA	NA	NA	NA	NA	40	NA	NA	35	NA	NA	NA	NA	NA	NA	NA	NA	NA	NA	NA	NA	NA	NA	40	NA	NA	306	226	320	1197	NA	NA	80	160
ST.12.92	NA	NA	NA	NA	NA	NA	NA	NA	NA	NA	NA	NA	NA	NA	NA	NA	NA	80	NA	20	NA	NA	NA	80	NA	NA	NA	NA	NA	40	NA	NA	NA	NA	NA	NA	NA	80	320	NA	320	905	640	NA	1693	NA	NA	320	733
ST.13.92	NA	NA	NA	NA	NA	NA	NA	NA	NA	NA	NA	NA	NA	NA	NA	NA	NA	2560	1280	1280	NA	NA	NA	12	NA	NA	NA	NA	NA	320	NA	NA	NA	NA	NA	NA	NA	640	640	NA	1280	20	NA	NA	70	NA	NA	NA	NA
UM.1982.92	NA	NA	NA	NA	NA	NA	NA	NA	NA	NA	NA	NA	NA	NA	NA	NA	NA	640	640	1280	NA	NA	NA	NA	NA	NA	NA	NA	NA	80	NA	NA	NA	NA	NA	NA	NA	160	2560	NA	640	40	NA	NA	NA	NA	NA	NA	NA
UM.2000.92	NA	NA	NA	NA	NA	NA	NA	NA	NA	NA	NA	NA	NA	NA	NA	NA	NA	640	1280	2560	10	NA	NA	18	NA	NA	NA	NA	NA	40	NA	NA	NA	NA	NA	NA	NA	160	2560	NA	640	28	320	80	80	NA	NA	NA	15
AK.4.93	NA	NA	NA	NA	NA	NA	NA	NA	NA	NA	NA	NA	NA	NA	NA	NA	NA	NA	NA	NA	NA	NA	NA	55	NA	NA	NA	NA	NA	NA	NA	NA	NA	NA	NA	NA	NA	NA	80	NA	40	423	640	NA	847	NA	NA	240	NA
ES.5458.93	NA	NA	NA	NA	NA	NA	NA	NA	NA	NA	NA	NA	NA	NA	NA	NA	NA	320	1280	1280	NA	NA	NA	60	NA	NA	NA	NA	NA	40	NA	NA	NA	NA	NA	NA	NA	80	2560	NA	640	20	NA	NA	120	NA	NA	NA	120
MA.G101.93	NA	NA	NA	NA	NA	NA	NA	NA	NA	NA	NA	NA	NA	NA	NA	NA	NA	640	2560	2560	NA	NA	NA	10	NA	NA	NA	NA	NA	80	NA	NA	NA	NA	NA	NA	NA	160	2560	NA	1280	80	NA	NA	20	NA	NA	NA	NA
MA.G109.93	NA	NA	NA	NA	NA	NA	NA	NA	NA	NA	NA	NA	NA	NA	NA	NA	NA	80	NA	40	NA	NA	NA	140	NA	NA	NA	NA	NA	40	NA	NA	NA	NA	NA	NA	NA	80	320	NA	80	453	320	NA	1600	NA	NA	1920	1120
MA.G116.93	NA	NA	NA	NA	NA	NA	NA	NA	NA	NA	NA	NA	NA	NA	NA	NA	NA	320	1280	1280	NA	NA	NA	15	NA	NA	NA	NA	NA	40	NA	NA	NA	NA	NA	NA	NA	80	1280	NA	320	80	NA	NA	60	NA	NA	NA	NA
MA.G122.93	NA	NA	NA	NA	NA	NA	NA	NA	NA	NA	NA	NA	NA	NA	NA	NA	NA	80	NA	40	NA	NA	NA	240	NA	NA	NA	NA	NA	40	NA	NA	NA	NA	NA	NA	NA	80	320	NA	80	905	640	NA	2560	NA	NA	7680	7680
MA.G130.93	NA	NA	NA	NA	NA	NA	NA	NA	NA	NA	NA	NA	NA	NA	NA	NA	NA	80	NA	20	NA	NA	NA	35	NA	NA	NA	NA	NA	40	NA	NA	NA	NA	NA	NA	NA	160	320	NA	80	784	320	NA	1920	NA	NA	80	240
NL.3.93	NA	NA	NA	NA	NA	NA	NA	NA	NA	NA	NA	NA	NA	NA	NA	NA	NA	320	80	160	NA	NA	NA	98	NA	NA	NA	NA	NA	320	NA	NA	NA	NA	NA	NA	NA	320	640	NA	160	1431	640	NA	1693	NA	NA	2240	876
NL.17.93	NA	NA	NA	NA	NA	NA	NA	NA	NA	NA	NA	NA	NA	NA	NA	NA	NA	320	80	80	NA	NA	NA	NA	NA	NA	NA	NA	NA	160	NA	NA	NA	NA	NA	NA	NA	320	1280	NA	320	1280	NA	NA	NA	NA	NA	NA	NA
NL.101.93	NA	NA	NA	NA	NA	NA	NA	NA	NA	NA	NA	NA	NA	NA	NA	NA	NA	160	NA	40	NA	NA	NA	20	NA	NA	NA	NA	NA	80	NA	NA	NA	NA	NA	NA	NA	160	320	NA	80	NA	200	NA	800	NA	NA	40	120
NL.115.93	NA	NA	NA	NA	NA	NA	NA	NA	NA	NA	NA	NA	NA	NA	NA	NA	NA	80	NA	40	NA	NA	NA	40	NA	NA	NA	NA	NA	40	NA	NA	NA	NA	NA	NA	NA	160	320	NA	80	NA	280	NA	1120	NA	NA	90	240
NL.126.93	NA	NA	NA	NA	NA	NA	NA	NA	NA	NA	NA	NA	NA	NA	NA	NA	NA	160	NA	40	NA	NA	NA	20	NA	NA	NA	NA	NA	40	NA	NA	NA	NA	NA	NA	NA	160	320	NA	80	NA	160	NA	640	NA	NA	60	160
NL.165.93	NA	NA	NA	NA	NA	NA	NA	NA	NA	NA	NA	NA	NA	NA	NA	NA	NA	160	640	640	NA	NA	NA	10	NA	NA	NA	NA	NA	40	NA	NA	NA	NA	NA	NA	NA	80	640	NA	320	80	NA	NA	40	NA	NA	NA	NA
NL.179.93	NA	NA	NA	NA	NA	NA	NA	NA	NA	NA	NA	NA	NA	NA	NA	NA	NA	320	NA	80	NA	NA	NA	NA	NA	NA	NA	NA	NA	NA	NA	NA	NA	NA	NA	NA	NA	320	320	NA	320	1280	NA	NA	NA	NA	NA	NA	NA
PA.287.93	NA	NA	NA	NA	NA	NA	NA	NA	NA	NA	NA	NA	NA	NA	NA	NA	NA	640	640	1280	NA	NA	NA	NA	NA	NA	NA	NA	NA	40	NA	NA	NA	NA	NA	NA	NA	160	2560	NA	320	40	NA	NA	NA	NA	NA	NA	NA
SG.6.93	NA	NA	NA	NA	NA	NA	NA	NA	NA	NA	NA	NA	NA	NA	NA	NA	NA	NA	NA	NA	NA	NA	NA	100	NA	NA	NA	NA	NA	NA	NA	NA	NA	NA	NA	NA	NA	NA	40	NA	NA	554	400	NA	3200	NA	NA	240	400
YA.56.93	NA	NA	NA	NA	NA	NA	NA	NA	NA	NA	NA	NA	NA	NA	NA	NA	NA	NA	NA	NA	NA	NA	NA	100	NA	NA	NA	NA	NA	NA	NA	NA	NA	NA	NA	NA	NA	NA	NA	NA	40	599	320	NA	1600	NA	NA	160	320
YA.61.93	NA	NA	NA	NA	NA	NA	NA	NA	NA	NA	NA	NA	NA	NA	NA	NA	NA	NA	NA	NA	NA	NA	NA	13	NA	NA	NA	NA	NA	NA	NA	NA	NA	NA	NA	NA	NA	NA	40	NA	20	NA	180	NA	560	NA	NA	70	140
YA.62.93	NA	NA	NA	NA	NA	NA	NA	NA	NA	NA	NA	NA	NA	NA	NA	NA	NA	NA	NA	NA	NA	NA	NA	90	NA	NA	NA	NA	NA	NA	NA	NA	NA	NA	NA	NA	NA	NA	40	NA	NA	423	200	NA	1120	NA	NA	70	200
NL.399.93	NA	NA	NA	NA	NA	NA	NA	NA	NA	NA	NA	NA	NA	NA	NA	NA	NA	NA	NA	40	320	NA	NA	400	NA	NA	NA	NA	NA	NA	NA	NA	NA	NA	NA	NA	NA	NA	NA	NA	80	190	117	92	423	NA	NA	70	240
SD.9.93	NA	NA	NA	NA	NA	NA	NA	NA	NA	NA	NA	NA	NA	NA	NA	NA	NA	NA	NA	NA	71	328	160	40	NA	NA	NA	NA	NA	NA	NA	NA	NA	NA	NA	NA	NA	20	NA	NA	NA	506	298	253	1113	640	160	NA	242
LY.672.93	NA	NA	NA	NA	NA	NA	NA	NA	NA	NA	NA	NA	NA	NA	NA	NA	NA	NA	NA	44	80	932	NA	120	NA	NA	NA	NA	NA	NA	NA	NA	NA	NA	NA	NA	NA	NA	NA	NA	58	298	296	101	789	1280	392	NA	223
LY.1803.93	NA	NA	NA	NA	NA	NA	NA	NA	NA	NA	NA	NA	NA	NA	NA	NA	NA	NA	NA	40	NA	NA	NA	NA	NA	NA	NA	NA	NA	NA	NA	NA	NA	NA	NA	NA	NA	NA	NA	NA	80	320	640	226	NA	NA	NA	NA	NA
NL.357.93	NA	NA	NA	NA	NA	NA	NA	NA	NA	NA	NA	NA	NA	NA	NA	NA	NA	NA	NA	40	NA	NA	NA	70	NA	NA	NA	NA	NA	NA	NA	NA	NA	NA	NA	NA	NA	NA	NA	NA	80	689	733	453	1920	NA	NA	480	800
NL.371.93	NA	NA	NA	NA	NA	NA	NA	NA	NA	NA	NA	NA	NA	NA	NA	NA	NA	NA	NA	20	160	NA	NA	75	NA	NA	NA	NA	NA	NA	NA	NA	NA	NA	NA	NA	NA	NA	NA	NA	40	153	77	80	701	NA	NA	1920	1120
NL.372.93	NA	NA	NA	NA	NA	NA	NA	NA	NA	NA	NA	NA	NA	NA	NA	NA	NA	NA	NA	40	640	NA	NA	160	NA	NA	NA	NA	NA	NA	NA	NA	NA	NA	NA	NA	NA	NA	NA	NA	80	40	67	50	306	NA	NA	200	320
NL.398.93	NA	NA	NA	NA	NA	NA	NA	NA	NA	NA	NA	NA	NA	NA	NA	NA	NA	NA	NA	80	NA	NA	NA	240	NA	NA	NA	NA	NA	NA	NA	NA	NA	NA	NA	NA	NA	NA	NA	NA	160	1224	1737	640	2240	NA	NA	2240	1120
NL.440.93	NA	NA	NA	NA	NA	NA	NA	NA	NA	NA	NA	NA	NA	NA	NA	NA	NA	NA	NA	40	NA	NA	NA	100	NA	NA	NA	NA	NA	NA	NA	NA	NA	NA	NA	NA	NA	NA	NA	NA	139	923	689	453	3200	NA	NA	320	560
OS.2219.93	NA	NA	NA	NA	NA	NA	NA	NA	NA	NA	NA	NA	NA	NA	NA	NA	NA	NA	NA	20	NA	NA	NA	240	NA	NA	NA	NA	NA	NA	NA	NA	NA	NA	NA	NA	NA	NA	NA	NA	80	403	231	226	4480	NA	NA	2560	2560
OS.2352.93	NA	NA	NA	NA	NA	NA	NA	NA	NA	NA	NA	NA	NA	NA	NA	NA	NA	NA	NA	NA	50	1280	NA	35	NA	NA	NA	NA	NA	NA	NA	NA	NA	NA	NA	NA	NA	NA	NA	NA	50	381	365	202	1115	1280	160	58	315
ST.20.93	NA	NA	NA	NA	NA	NA	NA	NA	NA	NA	NA	NA	NA	NA	NA	NA	NA	NA	NA	92	453	NA	NA	416	NA	NA	NA	NA	NA	NA	NA	NA	NA	NA	NA	NA	NA	NA	NA	NA	183	421	402	291	1781	NA	NA	3840	2395
VI.104.93	NA	NA	NA	NA	NA	NA	NA	NA	NA	NA	NA	NA	NA	NA	NA	NA	NA	NA	NA	20	NA	NA	NA	240	NA	NA	NA	NA	NA	NA	NA	NA	NA	NA	NA	NA	NA	NA	NA	NA	40	640	386	320	3200	NA	NA	160	320
WE.59.93	NA	NA	NA	NA	NA	NA	NA	NA	NA	NA	NA	NA	NA	NA	NA	NA	NA	NA	NA	10	NA	NA	NA	200	NA	NA	NA	NA	NA	NA	NA	NA	NA	NA	NA	NA	NA	NA	NA	NA	40	350	231	113	1120	NA	NA	960	1280
SP.19.93	NA	NA	NA	NA	NA	NA	NA	NA	NA	NA	NA	NA	NA	NA	NA	NA	NA	NA	NA	40	320	NA	NA	320	NA	NA	NA	NA	NA	NA	NA	NA	NA	NA	NA	NA	NA	NA	NA	NA	80	110	NA	80	320	NA	NA	140	320
LY.1815.93	NA	NA	NA	NA	NA	NA	NA	NA	NA	NA	NA	NA	NA	NA	NA	NA	NA	NA	NA	40	NA	NA	NA	280	NA	NA	NA	NA	NA	NA	NA	NA	NA	NA	NA	NA	NA	NA	NA	NA	40	299	320	160	1920	NA	NA	5760	2880
LY.22686.93	NA	NA	NA	NA	NA	NA	NA	NA	NA	NA	NA	NA	NA	NA	NA	NA	NA	NA	NA	40	NA	NA	NA	50	NA	NA	NA	NA	NA	NA	NA	NA	NA	NA	NA	NA	NA	NA	NA	NA	80	179	320	160	1600	NA	NA	1280	1600
LY.23602.93	NA	NA	NA	NA	NA	NA	NA	NA	NA	NA	NA	NA	NA	NA	NA	NA	NA	NA	NA	160	NA	NA	NA	120	NA	NA	NA	NA	NA	NA	NA	NA	NA	NA	NA	NA	NA	NA	NA	NA	160	358	506	320	2560	NA	NA	1120	3200
SP.3.93	NA	NA	NA	NA	NA	NA	NA	NA	NA	NA	NA	NA	NA	NA	NA	NA	NA	NA	NA	20	80	NA	NA	80	NA	NA	NA	NA	NA	NA	NA	NA	NA	NA	NA	NA	NA	NA	NA	NA	40	386	345	320	2024	NA	NA	120	280
HK.1.94	NA	NA	NA	NA	NA	NA	NA	NA	NA	NA	NA	NA	NA	NA	NA	NA	NA	NA	NA	160	160	NA	NA	160	NA	NA	NA	NA	NA	NA	NA	NA	NA	NA	NA	NA	NA	NA	NA	NA	160	196	212	160	1568	NA	NA	1920	2560
HK.2.94	NA	NA	NA	NA	NA	NA	NA	NA	NA	NA	NA	NA	NA	NA	NA	NA	NA	NA	NA	80	160	NA	NA	160	NA	NA	NA	NA	NA	NA	NA	NA	NA	NA	NA	NA	NA	NA	NA	NA	160	196	277	160	1197	NA	NA	1120	960
HK.55.94	NA	NA	NA	NA	NA	NA	NA	NA	NA	NA	NA	NA	NA	NA	NA	NA	NA	NA	NA	80	320	2560	NA	560	NA	NA	NA	NA	NA	NA	NA	NA	NA	NA	NA	NA	NA	NA	NA	NA	80	299	291	160	1379	1280	1280	2326	2326
HK.56.94	NA	NA	NA	NA	NA	NA	NA	NA	NA	NA	NA	NA	NA	NA	NA	NA	NA	NA	NA	80	320	NA	NA	320	NA	NA	NA	NA	NA	NA	NA	NA	NA	NA	NA	NA	NA	NA	NA	NA	160	358	320	160	2217	NA	NA	4480	4480
SA.15.94	NA	NA	NA	NA	NA	NA	NA	NA	NA	NA	NA	NA	NA	NA	NA	NA	NA	NA	NA	80	320	NA	NA	320	NA	NA	NA	NA	NA	NA	NA	NA	NA	NA	NA	NA	NA	NA	NA	NA	160	554	554	160	2024	NA	NA	2240	5120
SA.25.94	NA	NA	NA	NA	NA	NA	NA	NA	NA	NA	NA	NA	NA	NA	NA	NA	NA	NA	NA	80	160	NA	NA	320	NA	NA	NA	NA	NA	NA	NA	NA	NA	NA	NA	NA	NA	NA	NA	NA	160	320	599	80	2560	NA	NA	5120	6400
GD.25.93	NA	NA	NA	NA	NA	NA	NA	NA	NA	NA	NA	NA	NA	NA	NA	NA	NA	NA	NA	NA	320	1191	1024	117	NA	NA	NA	NA	NA	NA	NA	NA	NA	NA	NA	NA	NA	NA	NA	NA	NA	240	115	NA	1353	320	640	1432	NA
SL.142.93	NA	NA	NA	NA	NA	NA	NA	NA	NA	NA	NA	NA	NA	NA	NA	NA	NA	NA	NA	40	NA	NA	NA	80	NA	NA	NA	NA	NA	NA	NA	NA	NA	NA	NA	NA	NA	NA	NA	NA	NA	560	1197	NA	1693	640	160	560	320
SL.160.93	NA	NA	NA	NA	NA	NA	NA	NA	NA	NA	NA	NA	NA	NA	NA	NA	NA	NA	NA	NA	NA	NA	NA	100	NA	NA	NA	NA	NA	NA	NA	NA	NA	NA	NA	NA	NA	NA	NA	NA	NA	320	196	NA	1109	320	640	2560	1280
EN.7.94	NA	NA	NA	NA	NA	NA	NA	NA	NA	NA	NA	NA	NA	NA	NA	NA	NA	NA	NA	NA	NA	NA	NA	480	NA	NA	NA	NA	NA	NA	NA	NA	NA	NA	NA	NA	NA	NA	NA	NA	NA	80	57	NA	212	80	1280	400	560
JO.33.94	NA	NA	NA	NA	NA	NA	NA	NA	NA	NA	NA	NA	NA	NA	NA	NA	NA	NA	NA	NA	80	884	1320	80	NA	NA	NA	NA	NA	NA	NA	NA	NA	NA	NA	NA	NA	20	NA	NA	NA	NA	NA	NA	302	298	1280	907	NA
FI.338.95	NA	NA	NA	NA	NA	NA	NA	NA	NA	NA	NA	NA	NA	NA	NA	NA	NA	NA	NA	101	320	139	640	733	NA	NA	NA	NA	NA	NA	NA	NA	NA	NA	NA	NA	NA	NA	NA	NA	NA	160	NA	NA	190	160	640	NA	305
ST.506.95	NA	NA	NA	NA	NA	NA	NA	NA	NA	NA	NA	NA	NA	NA	NA	NA	NA	NA	NA	40	160	602	1280	320	NA	NA	NA	NA	NA	NA	NA	NA	NA	NA	NA	NA	NA	NA	NA	NA	NA	160	NA	NA	581	392	640	1280	932
JO.47.94	NA	NA	NA	NA	NA	NA	NA	NA	NA	NA	NA	NA	NA	NA	NA	NA	NA	NA	NA	NA	320	1280	NA	40	NA	NA	NA	NA	NA	NA	NA	NA	NA	NA	NA	NA	NA	NA	NA	NA	NA	200	NA	NA	547	320	1280	1197	1358
GE.A9509.95	NA	NA	NA	NA	NA	NA	NA	NA	NA	NA	NA	NA	NA	NA	NA	NA	NA	NA	NA	57	320	320	806	120	NA	NA	NA	NA	NA	NA	NA	NA	NA	NA	NA	NA	NA	NA	NA	NA	NA	80	113	NA	291	226	320	NA	342
HK.32.95	NA	NA	NA	NA	NA	NA	NA	NA	NA	NA	NA	NA	NA	NA	NA	NA	NA	NA	NA	80	640	5120	NA	320	NA	NA	NA	NA	NA	NA	NA	NA	NA	NA	NA	NA	NA	NA	NA	NA	NA	240	277	NA	1846	1810	2560	2930	3225
GE.6447.91	NA	NA	NA	NA	NA	NA	NA	NA	NA	NA	NA	NA	NA	NA	NA	NA	NA	320	1280	NA	NA	NA	NA	25	NA	NA	NA	80	NA	80	NA	NA	NA	NA	NA	NA	320	80	1280	NA	640	NA	NA	NA	30	NA	NA	NA	NA
LY.1189.91	NA	NA	NA	NA	NA	NA	NA	NA	NA	NA	NA	NA	NA	NA	NA	NA	NA	640	2560	NA	NA	NA	NA	20	NA	NA	NA	160	NA	80	NA	NA	NA	NA	NA	NA	640	80	2560	NA	2560	NA	NA	NA	40	NA	NA	NA	18
LY.1276.91	NA	NA	NA	NA	NA	NA	NA	NA	NA	NA	NA	NA	NA	NA	NA	NA	NA	160	640	NA	NA	NA	NA	60	NA	NA	NA	120	NA	80	NA	NA	NA	NA	NA	NA	320	80	1280	NA	640	NA	NA	NA	60	NA	NA	NA	60
LY.1337.91	NA	NA	NA	NA	NA	NA	NA	NA	NA	NA	NA	NA	NA	NA	NA	NA	NA	320	1920	NA	NA	NA	NA	NA	NA	NA	NA	160	NA	80	NA	NA	NA	NA	NA	NA	320	80	2560	NA	1280	NA	NA	NA	NA	NA	NA	NA	NA
LY.1373.91	NA	NA	NA	NA	NA	NA	NA	NA	NA	NA	NA	NA	NA	NA	NA	NA	NA	320	2560	NA	NA	NA	NA	20	NA	NA	NA	160	NA	160	NA	NA	NA	NA	NA	NA	320	160	1280	NA	1280	NA	NA	NA	40	NA	NA	NA	20
LY.1594.91	NA	NA	NA	NA	NA	NA	NA	NA	NA	NA	NA	NA	NA	NA	NA	NA	NA	320	2560	NA	NA	NA	NA	10	NA	NA	NA	160	NA	80	NA	NA	NA	NA	NA	NA	640	80	2560	NA	1280	NA	NA	NA	18	NA	NA	NA	NA
LY.23672.91	NA	NA	NA	NA	NA	NA	NA	NA	NA	NA	NA	NA	NA	NA	NA	NA	NA	320	1280	NA	NA	NA	NA	10	NA	NA	NA	120	NA	80	NA	NA	NA	NA	NA	NA	320	80	1280	NA	640	NA	NA	NA	35	NA	NA	NA	NA
LY.24103.91	NA	NA	NA	NA	NA	NA	NA	NA	NA	NA	NA	NA	NA	NA	NA	NA	NA	640	2560	NA	NA	NA	NA	20	NA	NA	NA	320	NA	160	NA	NA	NA	NA	NA	NA	640	160	2560	NA	1280	NA	NA	NA	20	NA	NA	NA	NA
LY.24222.91	NA	NA	NA	NA	NA	NA	NA	NA	NA	NA	NA	NA	NA	NA	NA	NA	NA	640	2560	NA	NA	NA	NA	40	NA	NA	NA	160	NA	160	NA	NA	NA	NA	NA	NA	320	160	2560	NA	2560	NA	NA	NA	50	NA	NA	NA	40
ST.20.91	NA	NA	NA	NA	NA	NA	NA	NA	NA	NA	NA	NA	NA	NA	NA	NA	NA	640	2560	NA	NA	NA	NA	10	NA	NA	NA	160	NA	160	NA	NA	NA	NA	NA	NA	640	160	640	NA	2560	NA	NA	NA	30	NA	NA	NA	NA
FI.218.92	NA	NA	NA	NA	NA	NA	NA	NA	NA	NA	NA	NA	NA	NA	NA	NA	NA	160	640	NA	NA	NA	NA	20	NA	NA	NA	80	NA	80	NA	NA	NA	NA	NA	NA	160	80	640	NA	640	NA	NA	NA	20	NA	NA	NA	20
GE.5113.92	NA	NA	NA	NA	NA	NA	NA	NA	NA	NA	NA	NA	NA	NA	NA	NA	NA	320	1280	NA	NA	NA	NA	10	NA	NA	NA	80	NA	160	NA	NA	NA	NA	NA	NA	320	160	2560	NA	1280	NA	NA	NA	10	NA	NA	NA	NA
HO.56798.92	NA	NA	NA	NA	NA	NA	NA	NA	NA	NA	NA	NA	NA	NA	NA	NA	NA	320	1280	NA	NA	NA	NA	10	NA	NA	NA	80	NA	80	NA	NA	NA	NA	NA	NA	320	80	1280	NA	1280	NA	NA	NA	35	NA	NA	NA	NA
HO.56829.92	NA	NA	NA	NA	NA	NA	NA	NA	NA	NA	NA	NA	NA	NA	NA	NA	NA	640	1280	NA	NA	NA	NA	40	NA	NA	NA	160	NA	160	NA	NA	NA	NA	NA	NA	640	160	2560	NA	1280	NA	NA	NA	40	NA	NA	NA	18
HO.56941.92	NA	NA	NA	NA	NA	NA	NA	NA	NA	NA	NA	NA	NA	NA	NA	NA	NA	320	1280	NA	NA	NA	NA	20	NA	NA	NA	80	NA	80	NA	NA	NA	NA	NA	NA	320	80	1280	NA	1280	NA	NA	NA	40	NA	NA	NA	20
OV.31.92	NA	NA	NA	NA	NA	NA	NA	NA	NA	NA	NA	NA	NA	NA	NA	NA	NA	1280	5120	NA	NA	NA	NA	15	NA	NA	NA	640	NA	160	NA	NA	NA	NA	NA	NA	2560	160	10240	NA	2560	NA	NA	NA	25	NA	NA	NA	20
NI.3126.92	NA	NA	NA	NA	NA	NA	NA	NA	NA	NA	NA	NA	NA	NA	NA	NA	NA	320	2560	NA	NA	NA	NA	30	NA	NA	NA	160	NA	80	NA	NA	NA	NA	NA	NA	320	80	2560	NA	1280	NA	NA	NA	40	NA	NA	NA	NA
NL.823.92	NA	NA	NA	NA	NA	NA	NA	NA	NA	NA	NA	NA	NA	NA	NA	NA	NA	320	1280	NA	NA	NA	NA	20	NA	NA	NA	160	NA	80	NA	NA	NA	NA	NA	NA	320	80	1280	NA	1280	NA	NA	NA	40	NA	NA	NA	18
PA.320.92	NA	NA	NA	NA	NA	NA	NA	NA	NA	NA	NA	NA	NA	NA	NA	NA	NA	320	2560	NA	NA	NA	NA	18	NA	NA	NA	160	NA	160	NA	NA	NA	NA	NA	NA	640	160	2560	NA	1280	NA	NA	NA	25	NA	NA	NA	NA
PA.325.92	NA	NA	NA	NA	NA	NA	NA	NA	NA	NA	NA	NA	NA	NA	NA	NA	NA	320	2560	NA	NA	NA	NA	12	NA	NA	NA	160	NA	160	NA	NA	NA	NA	NA	NA	320	80	2560	NA	2560	NA	NA	NA	20	NA	NA	NA	NA
PA.407.92	NA	NA	NA	NA	NA	NA	NA	NA	NA	NA	NA	NA	NA	NA	NA	NA	NA	320	1280	NA	NA	NA	NA	10	NA	NA	NA	160	NA	80	NA	NA	NA	NA	NA	NA	320	160	2560	NA	640	NA	NA	NA	20	NA	NA	NA	NA
PA.417.92	NA	NA	NA	NA	NA	NA	NA	NA	NA	NA	NA	NA	NA	NA	NA	NA	NA	640	1280	NA	NA	NA	NA	50	NA	NA	NA	160	NA	80	NA	NA	NA	NA	NA	NA	320	80	1280	NA	640	NA	NA	NA	80	NA	NA	NA	20
PA.424.92	NA	NA	NA	NA	NA	NA	NA	NA	NA	NA	NA	NA	NA	NA	NA	NA	NA	320	1280	NA	NA	NA	NA	40	NA	NA	NA	80	NA	80	NA	NA	NA	NA	NA	NA	320	80	2560	NA	640	NA	NA	NA	40	NA	NA	NA	NA
PA.457.92	NA	NA	NA	NA	NA	NA	NA	NA	NA	NA	NA	NA	NA	NA	NA	NA	NA	320	2560	NA	NA	NA	NA	NA	NA	NA	NA	160	NA	160	NA	NA	NA	NA	NA	NA	640	160	2560	NA	1280	NA	NA	NA	10	NA	NA	NA	NA
PA.490.92	NA	NA	NA	NA	NA	NA	NA	NA	NA	NA	NA	NA	NA	NA	NA	NA	NA	320	2560	NA	NA	NA	NA	25	NA	NA	NA	160	NA	80	NA	NA	NA	NA	NA	NA	320	80	2560	NA	1280	NA	NA	NA	35	NA	NA	NA	20
PA.512.92	NA	NA	NA	NA	NA	NA	NA	NA	NA	NA	NA	NA	NA	NA	NA	NA	NA	160	1280	NA	NA	NA	NA	20	NA	NA	NA	80	NA	80	NA	NA	NA	NA	NA	NA	320	60	1280	NA	640	NA	NA	NA	20	NA	NA	NA	NA
PA.548.92	NA	NA	NA	NA	NA	NA	NA	NA	NA	NA	NA	NA	NA	NA	NA	NA	NA	320	1280	NA	NA	NA	NA	10	NA	NA	NA	80	NA	80	NA	NA	NA	NA	NA	NA	160	80	1280	NA	1280	NA	NA	NA	10	NA	NA	NA	NA
PA.564.92	NA	NA	NA	NA	NA	NA	NA	NA	NA	NA	NA	NA	NA	NA	NA	NA	NA	320	1920	NA	NA	NA	NA	60	NA	NA	NA	160	NA	80	NA	NA	NA	NA	NA	NA	320	80	1280	NA	640	NA	NA	NA	60	NA	NA	NA	40
PA.597.92	NA	NA	NA	NA	NA	NA	NA	NA	NA	NA	NA	NA	NA	NA	NA	NA	NA	160	1280	NA	NA	NA	NA	20	NA	NA	NA	80	NA	40	NA	NA	NA	NA	NA	NA	160	40	640	NA	640	NA	NA	NA	35	NA	NA	NA	18
RD.100540.92	NA	NA	NA	NA	NA	NA	NA	NA	NA	NA	NA	NA	NA	NA	NA	NA	NA	640	2560	NA	NA	NA	NA	NA	NA	NA	NA	160	NA	160	NA	NA	NA	NA	NA	NA	640	160	1280	NA	2560	NA	NA	NA	NA	NA	NA	NA	NA
ST.8.92	NA	NA	NA	NA	NA	NA	NA	NA	NA	NA	NA	NA	NA	NA	NA	NA	NA	160	1280	NA	NA	NA	NA	30	NA	NA	NA	160	NA	80	NA	NA	NA	NA	NA	NA	320	80	1280	NA	640	NA	NA	NA	60	NA	NA	NA	30
FI.339.95	NA	NA	NA	NA	NA	NA	NA	NA	NA	NA	NA	NA	NA	NA	NA	NA	NA	NA	NA	NA	NA	226	1280	280	NA	NA	NA	NA	NA	NA	NA	NA	NA	NA	NA	NA	NA	NA	NA	NA	NA	40	20	NA	113	80	NA	NA	462
HK.3.95	NA	NA	NA	NA	NA	NA	NA	NA	NA	NA	NA	NA	NA	NA	NA	NA	NA	NA	NA	80	NA	2560	NA	560	NA	NA	NA	NA	NA	NA	NA	NA	NA	NA	NA	NA	NA	NA	NA	NA	NA	640	320	NA	2395	1280	NA	733	1358
FI.381.95	NA	NA	NA	NA	NA	NA	NA	NA	NA	NA	NA	NA	NA	NA	NA	NA	NA	NA	NA	NA	NA	277	867	320	NA	NA	NA	NA	NA	NA	NA	NA	NA	NA	NA	NA	NA	NA	NA	NA	NA	70	20	NA	240	NA	NA	640	446
HK.38.95	NA	NA	NA	NA	NA	NA	NA	NA	NA	NA	NA	NA	NA	NA	NA	NA	NA	NA	NA	80	NA	1280	1280	640	NA	NA	NA	NA	NA	NA	NA	NA	NA	NA	NA	NA	NA	NA	NA	NA	NA	480	480	NA	960	NA	NA	960	1280
HK.49.95	NA	NA	NA	NA	NA	NA	NA	NA	NA	NA	NA	NA	NA	NA	NA	NA	NA	NA	NA	120	NA	800	1280	960	NA	NA	NA	NA	NA	NA	NA	NA	NA	NA	NA	NA	NA	NA	NA	NA	NA	60	20	NA	320	NA	NA	320	679
HK.55.95	NA	NA	NA	NA	NA	NA	NA	NA	NA	NA	NA	NA	NA	NA	NA	NA	NA	NA	NA	73	NA	221	313	1113	NA	NA	NA	NA	NA	NA	NA	NA	NA	NA	NA	NA	NA	NA	NA	NA	NA	1120	640	NA	1920	NA	NA	200	345
LY.2279.95	NA	NA	NA	NA	NA	NA	NA	NA	NA	NA	NA	NA	NA	NA	NA	NA	NA	NA	NA	88	NA	459	448	458	NA	NA	NA	NA	NA	NA	NA	NA	NA	NA	NA	NA	NA	NA	NA	NA	NA	NA	NA	NA	320	NA	NA	NA	465
NA.933.95	NA	NA	NA	NA	NA	NA	NA	NA	NA	NA	NA	NA	NA	NA	NA	NA	NA	NA	NA	98	NA	140	355	784	NA	NA	NA	NA	NA	NA	NA	NA	NA	NA	NA	NA	NA	NA	NA	NA	NA	320	140	NA	420	NA	NA	85	NA
NL.271.95	NA	NA	NA	NA	NA	NA	NA	NA	NA	NA	NA	NA	NA	NA	NA	NA	NA	NA	NA	80	NA	320	640	960	NA	NA	NA	NA	NA	NA	NA	NA	NA	NA	NA	NA	NA	NA	NA	NA	NA	13	NA	NA	70	NA	NA	280	212
VI.75.95	NA	NA	NA	NA	NA	NA	NA	NA	NA	NA	NA	NA	NA	NA	NA	NA	NA	NA	NA	40	NA	720	960	320	NA	NA	NA	NA	NA	NA	NA	NA	NA	NA	NA	NA	NA	NA	NA	NA	NA	320	320	NA	1280	NA	NA	1280	480
WU.359.95	NA	NA	NA	NA	NA	NA	NA	NA	NA	NA	NA	NA	NA	NA	NA	NA	NA	NA	NA	52	NA	89	170	363	NA	NA	NA	NA	NA	NA	NA	NA	NA	NA	NA	NA	NA	NA	NA	NA	NA	NA	NA	NA	NA	NA	NA	NA	207
BR.8.96	NA	NA	NA	NA	NA	NA	NA	NA	NA	NA	NA	NA	NA	NA	NA	NA	NA	NA	NA	NA	NA	NA	128	834	NA	NA	NA	NA	NA	NA	NA	NA	NA	NA	NA	NA	NA	NA	NA	NA	NA	100	100	NA	198	NA	NA	120	NA
GE.3958.96	NA	NA	NA	NA	NA	NA	NA	NA	NA	NA	NA	NA	NA	NA	NA	NA	NA	NA	NA	160	NA	370	632	1174	NA	NA	NA	NA	NA	NA	NA	NA	NA	NA	NA	NA	NA	NA	NA	NA	NA	120	80	NA	320	NA	NA	50	538
HK.20.96	NA	NA	NA	NA	NA	NA	NA	NA	NA	NA	NA	NA	NA	NA	NA	NA	NA	NA	NA	160	NA	195	346	1148	NA	NA	NA	NA	NA	NA	NA	NA	NA	NA	NA	NA	NA	NA	NA	NA	NA	80	80	NA	320	NA	NA	80	254
HK.42.96	NA	NA	NA	NA	NA	NA	NA	NA	NA	NA	NA	NA	NA	NA	NA	NA	NA	NA	NA	80	NA	1324	1313	97	NA	NA	NA	NA	NA	NA	NA	NA	NA	NA	NA	NA	NA	NA	NA	NA	NA	90	120	NA	320	NA	NA	200	957
HK.357.96	NA	NA	NA	NA	NA	NA	NA	NA	NA	NA	NA	NA	NA	NA	NA	NA	NA	NA	NA	160	NA	160	640	2560	NA	NA	NA	NA	NA	NA	NA	NA	NA	NA	NA	NA	NA	NA	NA	NA	NA	120	100	NA	400	NA	NA	160	392
HK.358.96	NA	NA	NA	NA	NA	NA	NA	NA	NA	NA	NA	NA	NA	NA	NA	NA	NA	NA	NA	80	NA	120	160	640	NA	NA	NA	NA	NA	NA	NA	NA	NA	NA	NA	NA	NA	NA	NA	NA	NA	60	60	NA	240	NA	NA	40	226
HK.434.96	NA	NA	NA	NA	NA	NA	NA	NA	NA	NA	NA	NA	NA	NA	NA	NA	NA	NA	NA	NA	NA	453	761	50	NA	NA	NA	NA	NA	NA	NA	NA	NA	NA	NA	NA	NA	NA	NA	NA	NA	80	80	NA	320	NA	NA	2240	1197
NL.91.96	NA	NA	NA	NA	NA	NA	NA	NA	NA	NA	NA	NA	NA	NA	NA	NA	NA	NA	NA	160	NA	1280	2560	60	NA	NA	NA	NA	NA	NA	NA	NA	NA	NA	NA	NA	NA	NA	NA	NA	NA	40	640	NA	720	NA	NA	720	NA
SP.1.96	NA	NA	NA	NA	NA	NA	NA	NA	NA	NA	NA	NA	NA	NA	NA	NA	NA	NA	NA	57	NA	128	165	587	NA	NA	NA	NA	NA	NA	NA	NA	NA	NA	NA	NA	NA	NA	NA	NA	NA	140	280	NA	1120	NA	NA	106	247
HK.1.97	NA	NA	NA	NA	NA	NA	NA	NA	NA	NA	NA	NA	NA	NA	NA	NA	NA	NA	NA	NA	NA	187	235	854	NA	NA	NA	NA	NA	NA	NA	NA	NA	NA	NA	NA	NA	NA	NA	NA	NA	160	120	NA	160	NA	NA	240	80
NE.491.97	NA	NA	NA	NA	NA	NA	NA	NA	NA	NA	NA	NA	NA	NA	NA	NA	NA	NA	NA	NA	NA	109	109	476	NA	NA	NA	NA	NA	NA	NA	NA	NA	NA	NA	NA	NA	NA	NA	NA	NA	NA	NA	NA	NA	NA	NA	NA	160
AU.10.97	NA	NA	NA	NA	NA	NA	NA	NA	NA	NA	NA	NA	NA	NA	NA	NA	NA	NA	NA	NA	NA	NA	NA	242	NA	NA	NA	NA	NA	NA	NA	NA	NA	NA	NA	NA	NA	NA	NA	NA	NA	NA	NA	NA	NA	NA	NA	NA	NA
HK.280.97	NA	NA	NA	NA	NA	NA	NA	NA	NA	NA	NA	NA	NA	NA	NA	NA	NA	NA	NA	NA	NA	80	108	863	NA	NA	NA	NA	NA	NA	NA	NA	NA	NA	NA	NA	NA	NA	NA	NA	NA	NA	NA	NA	NA	NA	NA	NA	NA
NL.300.97	NA	NA	NA	NA	NA	NA	NA	NA	NA	NA	NA	NA	NA	NA	NA	NA	NA	NA	NA	NA	NA	NA	NA	422	NA	NA	NA	NA	NA	NA	NA	NA	NA	NA	NA	NA	NA	NA	NA	NA	NA	NA	NA	NA	NA	NA	NA	NA	NA
SY.5.97	NA	NA	NA	NA	NA	NA	NA	NA	NA	NA	NA	NA	NA	NA	NA	NA	NA	NA	NA	NA	NA	NA	NA	117	NA	NA	NA	NA	NA	NA	NA	NA	NA	NA	NA	NA	NA	NA	NA	NA	NA	NA	NA	NA	NA	NA	NA	NA	NA
NL.5.98	NA	NA	NA	NA	NA	NA	NA	NA	NA	NA	NA	NA	NA	NA	NA	NA	NA	NA	NA	NA	NA	160	163	542	NA	NA	NA	NA	NA	NA	NA	NA	NA	NA	NA	NA	NA	NA	NA	NA	NA	100	200	NA	480	NA	NA	99	400
LY.1781.96	NA	NA	NA	NA	NA	NA	NA	NA	NA	NA	NA	NA	NA	NA	NA	NA	NA	NA	NA	NA	NA	320	320	596	NA	NA	NA	NA	NA	NA	NA	NA	NA	NA	NA	NA	NA	NA	NA	NA	NA	200	100	NA	640	NA	NA	100	240
JO.10.97	NA	NA	NA	NA	NA	NA	NA	NA	NA	NA	NA	NA	NA	NA	NA	NA	NA	NA	NA	NA	NA	80	160	422	NA	NA	NA	NA	NA	NA	NA	NA	NA	NA	NA	NA	NA	NA	NA	NA	NA	320	120	NA	358	NA	NA	90	98
OS.21.97	NA	NA	NA	NA	NA	NA	NA	NA	NA	NA	NA	NA	NA	NA	NA	NA	NA	NA	NA	NA	NA	80	160	842	NA	NA	NA	NA	NA	NA	NA	NA	NA	NA	NA	NA	NA	NA	NA	NA	NA	800	50	NA	560	NA	NA	70	160
OS.244.97	NA	NA	NA	NA	NA	NA	NA	NA	NA	NA	NA	NA	NA	NA	NA	NA	NA	NA	NA	NA	NA	160	320	708	NA	NA	NA	NA	NA	NA	NA	NA	NA	NA	NA	NA	NA	NA	NA	NA	NA	160	160	NA	320	NA	NA	60	240
NL.414.98	NA	NA	NA	NA	NA	NA	NA	NA	NA	NA	NA	NA	NA	NA	NA	NA	NA	NA	NA	NA	NA	NA	NA	317	NA	NA	NA	NA	NA	NA	NA	NA	NA	NA	NA	NA	NA	NA	NA	NA	NA	NA	NA	NA	NA	NA	NA	NA	NA
NL.462.98	NA	NA	NA	NA	NA	NA	NA	NA	NA	NA	NA	NA	NA	NA	NA	NA	NA	NA	NA	NA	NA	NA	NA	NA	NA	NA	NA	NA	NA	NA	NA	NA	NA	NA	NA	NA	NA	NA	NA	NA	NA	NA	NA	NA	NA	NA	NA	NA	NA
MW.10.99	NA	NA	NA	NA	NA	NA	NA	NA	NA	NA	NA	NA	NA	NA	NA	NA	NA	NA	NA	NA	NA	NA	NA	58	NA	NA	NA	NA	NA	NA	NA	NA	NA	NA	NA	NA	NA	NA	NA	NA	NA	NA	NA	NA	NA	NA	NA	NA	NA
NL.301.99	NA	NA	NA	NA	NA	NA	NA	NA	NA	NA	NA	NA	NA	NA	NA	NA	NA	NA	NA	NA	NA	NA	NA	86	NA	NA	NA	NA	NA	NA	NA	NA	NA	NA	NA	NA	NA	NA	NA	NA	NA	NA	NA	NA	NA	NA	NA	NA	NA
NL.3.00	NA	NA	NA	NA	NA	NA	NA	NA	NA	NA	NA	NA	NA	NA	NA	NA	NA	NA	NA	NA	NA	NA	NA	NA	NA	NA	NA	NA	NA	NA	NA	NA	NA	NA	NA	NA	NA	NA	NA	NA	NA	NA	NA	NA	20	NA	NA	NA	25
NL.427.98	NA	NA	NA	NA	NA	NA	NA	NA	NA	NA	NA	NA	NA	NA	NA	NA	NA	NA	NA	NA	NA	NA	NA	145	NA	NA	NA	NA	NA	NA	NA	NA	NA	NA	NA	NA	NA	NA	NA	NA	NA	NA	NA	NA	NA	NA	NA	NA	NA
TE.1.77	NA	80	320	NA	NA	320	248	NA	NA	NA	NA	NA	NA	NA	NA	453	NA	NA	NA	NA	NA	NA	NA	NA	254	496	NA	453	NA	NA	2560	NA	1280	320	NA	NA	NA	40	NA	NA	NA	NA	NA	NA	NA	NA	NA	NA	NA
GF.V728.85	NA	NA	NA	NA	NA	NA	80	NA	NA	NA	NA	NA	NA	NA	NA	1280	NA	NA	NA	NA	NA	NA	NA	NA	40	320	NA	1280	NA	NA	NA	NA	240	NA	NA	NA	NA	NA	NA	NA	NA	NA	NA	NA	NA	NA	NA	NA	NA
PM.2007.99	NA	NA	NA	NA	NA	NA	NA	NA	NA	NA	NA	NA	NA	NA	NA	NA	NA	NA	NA	NA	NA	NA	NA	NA	NA	NA	NA	NA	NA	NA	NA	NA	NA	NA	NA	NA	NA	NA	NA	NA	NA	NA	NA	NA	NA	NA	NA	NA	NA
NL.118.01	NA	NA	NA	NA	NA	NA	NA	NA	NA	NA	NA	NA	NA	NA	NA	NA	NA	NA	NA	NA	NA	NA	NA	NA	NA	NA	NA	NA	NA	NA	NA	NA	NA	NA	NA	NA	NA	NA	NA	NA	NA	NA	NA	NA	NA	NA	NA	NA	NA
NL.126.01	NA	NA	NA	NA	NA	NA	NA	NA	NA	NA	NA	NA	NA	NA	NA	NA	NA	NA	NA	NA	NA	NA	NA	NA	NA	NA	NA	NA	NA	NA	NA	NA	NA	NA	NA	NA	NA	NA	NA	NA	NA	NA	NA	NA	NA	NA	NA	NA	NA
NL.1.02	NA	NA	NA	NA	NA	NA	NA	NA	NA	NA	NA	NA	NA	NA	NA	NA	NA	NA	NA	NA	NA	NA	NA	243	NA	NA	NA	NA	NA	NA	NA	NA	NA	NA	NA	NA	NA	NA	NA	NA	NA	NA	NA	NA	40	NA	NA	25	NA
NL.120.02	NA	NA	NA	NA	NA	NA	NA	NA	NA	NA	NA	NA	NA	NA	NA	NA	NA	NA	NA	NA	NA	NA	NA	NA	NA	NA	NA	NA	NA	NA	NA	NA	NA	NA	NA	NA	NA	NA	NA	NA	NA	NA	NA	NA	NA	NA	NA	NA	NA
NL.18.94	NA	NA	NA	NA	NA	NA	NA	NA	NA	NA	NA	NA	NA	NA	NA	NA	NA	NA	NA	NA	NA	63	210	214	NA	NA	NA	NA	NA	NA	NA	NA	NA	NA	NA	NA	NA	NA	NA	NA	NA	400	400	NA	3840	NA	NA	NA	NA
FU.411.02	NA	NA	NA	NA	NA	NA	NA	NA	NA	NA	NA	NA	NA	NA	NA	NA	NA	NA	NA	NA	NA	NA	NA	NA	NA	NA	NA	NA	NA	NA	NA	NA	NA	NA	NA	NA	NA	NA	NA	NA	NA	NA	NA	NA	NA	NA	NA	NA	NA
NL.22.03	NA	NA	NA	NA	NA	NA	NA	NA	NA	NA	NA	NA	NA	NA	NA	NA	NA	NA	NA	NA	NA	NA	NA	100	NA	NA	NA	NA	NA	NA	NA	NA	NA	NA	NA	NA	NA	NA	NA	NA	NA	NA	NA	NA	NA	NA	NA	NA	NA
NL.213.03	NA	NA	NA	NA	NA	NA	NA	NA	NA	NA	NA	NA	NA	NA	NA	NA	NA	NA	NA	NA	NA	NA	NA	200	NA	NA	NA	NA	NA	NA	NA	NA	NA	NA	NA	NA	NA	NA	NA	NA	NA	NA	NA	NA	NA	NA	NA	NA	NA
NL.217.03	NA	NA	NA	NA	NA	NA	NA	NA	NA	NA	NA	NA	NA	NA	NA	NA	NA	NA	NA	NA	NA	NA	NA	40	NA	NA	NA	NA	NA	NA	NA	NA	NA	NA	NA	NA	NA	NA	NA	NA	NA	NA	NA	NA	NA	NA	NA	NA	NA
NL.222.03	NA	NA	NA	NA	NA	NA	NA	NA	NA	NA	NA	NA	NA	NA	NA	NA	NA	NA	NA	NA	NA	NA	NA	100	NA	NA	NA	NA	NA	NA	NA	NA	NA	NA	NA	NA	NA	NA	NA	NA	NA	NA	NA	NA	NA	NA	NA	NA	NA
FI.170.03	NA	NA	NA	NA	NA	NA	NA	NA	NA	NA	NA	NA	NA	NA	NA	NA	NA	NA	NA	NA	NA	NA	NA	50	NA	NA	NA	NA	NA	NA	NA	NA	NA	NA	NA	NA	NA	NA	NA	NA	NA	NA	NA	NA	NA	NA	NA	NA	NA
NL.124.01	NA	NA	NA	NA	NA	NA	NA	NA	NA	NA	NA	NA	NA	NA	NA	NA	NA	NA	NA	NA	NA	NA	NA	280	NA	NA	NA	NA	NA	NA	NA	NA	NA	NA	NA	NA	NA	NA	NA	NA	NA	NA	NA	NA	NA	NA	NA	25	NA
NL.20.03	NA	NA	NA	NA	NA	NA	NA	NA	NA	NA	NA	NA	NA	NA	NA	NA	NA	NA	NA	NA	NA	NA	NA	640	NA	NA	NA	NA	NA	NA	NA	NA	NA	NA	NA	NA	NA	NA	NA	NA	NA	NA	NA	NA	NA	NA	NA	100	NA
HK.1.68	1280	2560	53	NA	NA	NA	NA	NA	NA	NA	NA	NA	NA	NA	NA	NA	NA	NA	NA	NA	NA	NA	NA	NA	NA	NA	NA	NA	NA	NA	NA	NA	NA	NA	NA	NA	NA	NA	NA	NA	NA	NA	NA	NA	NA	NA	NA	NA	NA
HK.107.71	NA	320	1280	320	NA	NA	NA	NA	NA	NA	NA	NA	NA	NA	NA	NA	NA	NA	NA	NA	NA	NA	NA	NA	NA	NA	NA	NA	NA	NA	NA	NA	NA	NA	NA	NA	NA	NA	NA	NA	NA	NA	NA	NA	NA	NA	NA	NA	NA
EN.42.72	NA	5120	1280	640	NA	NA	NA	NA	NA	NA	NA	NA	NA	NA	NA	NA	NA	NA	NA	NA	NA	NA	NA	NA	NA	NA	NA	NA	NA	NA	NA	NA	NA	NA	NA	NA	NA	NA	NA	NA	NA	NA	NA	NA	NA	NA	NA	NA	NA
PC.1.73	68	640	1227	640	NA	NA	NA	NA	NA	NA	NA	NA	NA	NA	NA	NA	NA	NA	NA	NA	NA	NA	NA	NA	NA	NA	NA	NA	NA	NA	80	NA	NA	NA	NA	NA	NA	NA	NA	NA	NA	NA	NA	NA	NA	NA	NA	NA	NA
VI.3.75	NA	320	1280	320	NA	40	NA	NA	NA	NA	NA	NA	NA	NA	NA	NA	NA	NA	NA	NA	NA	NA	NA	NA	NA	NA	NA	NA	NA	NA	320	NA	NA	NA	NA	NA	NA	NA	NA	NA	NA	NA	NA	NA	NA	NA	NA	NA	NA
Wyoming.3.03	NA	NA	NA	NA	NA	NA	NA	NA	NA	NA	NA	NA	NA	NA	NA	NA	NA	NA	NA	NA	NA	NA	NA	NA	NA	NA	NA	NA	NA	NA	NA	NA	NA	NA	NA	NA	NA	NA	NA	NA	NA	NA	NA	NA	NA	NA	NA	NA	NA
Shantou.1219.04	NA	NA	NA	NA	NA	NA	NA	NA	NA	NA	NA	NA	NA	NA	NA	NA	NA	NA	NA	NA	NA	NA	NA	NA	NA	NA	NA	NA	NA	NA	NA	NA	NA	NA	NA	NA	NA	NA	NA	NA	NA	NA	NA	NA	NA	NA	NA	NA	NA
CA.7.04	NA	NA	NA	NA	NA	NA	NA	NA	NA	NA	NA	NA	NA	NA	NA	NA	NA	NA	NA	NA	NA	NA	NA	NA	NA	NA	NA	NA	NA	NA	NA	NA	NA	NA	NA	NA	NA	NA	NA	NA	NA	NA	NA	NA	NA	NA	NA	NA	NA
NY.55.04	NA	NA	NA	NA	NA	NA	NA	NA	NA	NA	NA	NA	NA	NA	NA	NA	NA	NA	NA	NA	NA	NA	NA	NA	NA	NA	NA	NA	NA	NA	NA	NA	NA	NA	NA	NA	NA	NA	NA	NA	NA	NA	NA	NA	NA	NA	NA	NA	NA
Annecy.1138.05	NA	NA	NA	NA	NA	NA	NA	NA	NA	NA	NA	NA	NA	NA	NA	NA	NA	NA	NA	NA	NA	NA	NA	NA	NA	NA	NA	NA	NA	NA	NA	NA	NA	NA	NA	NA	NA	NA	NA	NA	NA	NA	NA	NA	NA	NA	NA	NA	NA
HK.4443.05	NA	NA	NA	NA	NA	NA	NA	NA	NA	NA	NA	NA	NA	NA	NA	NA	NA	NA	NA	NA	NA	NA	NA	NA	NA	NA	NA	NA	NA	NA	NA	NA	NA	NA	NA	NA	NA	NA	NA	NA	NA	NA	NA	NA	NA	NA	NA	NA	NA
Anhui.1238.05	NA	NA	NA	NA	NA	NA	NA	NA	NA	NA	NA	NA	NA	NA	NA	NA	NA	NA	NA	NA	NA	NA	NA	NA	NA	NA	NA	NA	NA	NA	NA	NA	NA	NA	NA	NA	NA	NA	NA	NA	NA	NA	NA	NA	NA	NA	NA	NA	NA
Hiroshima.52.05	NA	NA	NA	NA	NA	NA	NA	NA	NA	NA	NA	NA	NA	NA	NA	NA	NA	NA	NA	NA	NA	NA	NA	NA	NA	NA	NA	NA	NA	NA	NA	NA	NA	NA	NA	NA	NA	NA	NA	NA	NA	NA	NA	NA	NA	NA	NA	NA	NA
Wis.67.05	NA	NA	NA	NA	NA	NA	NA	NA	NA	NA	NA	NA	NA	NA	NA	NA	NA	NA	NA	NA	NA	NA	NA	NA	NA	NA	NA	NA	NA	NA	NA	NA	NA	NA	NA	NA	NA	NA	NA	NA	NA	NA	NA	NA	NA	NA	NA	NA	NA
WE.1.04	NA	NA	NA	NA	NA	NA	NA	NA	NA	NA	NA	NA	NA	NA	NA	NA	NA	NA	NA	NA	NA	NA	NA	NA	NA	NA	NA	NA	NA	NA	NA	NA	NA	NA	NA	NA	NA	NA	NA	NA	NA	NA	NA	NA	NA	NA	NA	NA	NA
Sing.37.04	NA	NA	NA	NA	NA	NA	NA	NA	NA	NA	NA	NA	NA	NA	NA	NA	NA	NA	NA	NA	NA	NA	NA	NA	NA	NA	NA	NA	NA	NA	NA	NA	NA	NA	NA	NA	NA	NA	NA	NA	NA	NA	NA	NA	NA	NA	NA	NA	NA
VI.523.04	NA	NA	NA	NA	NA	NA	NA	NA	NA	NA	NA	NA	NA	NA	NA	NA	NA	NA	NA	NA	NA	NA	NA	NA	NA	NA	NA	NA	NA	NA	NA	NA	NA	NA	NA	NA	NA	NA	NA	NA	NA	NA	NA	NA	NA	NA	NA	NA	NA
Bris.3.05	NA	NA	NA	NA	NA	NA	NA	NA	NA	NA	NA	NA	NA	NA	NA	NA	NA	NA	NA	NA	NA	NA	NA	NA	NA	NA	NA	NA	NA	NA	NA	NA	NA	NA	NA	NA	NA	NA	NA	NA	NA	NA	NA	NA	NA	NA	NA	NA	NA
VI.512.05	NA	NA	NA	NA	NA	NA	NA	NA	NA	NA	NA	NA	NA	NA	NA	NA	NA	NA	NA	NA	NA	NA	NA	NA	NA	NA	NA	NA	NA	NA	NA	NA	NA	NA	NA	NA	NA	NA	NA	NA	NA	NA	NA	NA	NA	NA	NA	NA	NA
Mal.753.05	NA	NA	NA	NA	NA	NA	NA	NA	NA	NA	NA	NA	NA	NA	NA	NA	NA	NA	NA	NA	NA	NA	NA	NA	NA	NA	NA	NA	NA	NA	NA	NA	NA	NA	NA	NA	NA	NA	NA	NA	NA	NA	NA	NA	NA	NA	NA	NA	NA
Bris.49.06	NA	NA	NA	NA	NA	NA	NA	NA	NA	NA	NA	NA	NA	NA	NA	NA	NA	NA	NA	NA	NA	NA	NA	NA	NA	NA	NA	NA	NA	NA	NA	NA	NA	NA	NA	NA	NA	NA	NA	NA	NA	NA	NA	NA	NA	NA	NA	NA	NA
VI.170.06	NA	NA	NA	NA	NA	NA	NA	NA	NA	NA	NA	NA	NA	NA	NA	NA	NA	NA	NA	NA	NA	NA	NA	NA	NA	NA	NA	NA	NA	NA	NA	NA	NA	NA	NA	NA	NA	NA	NA	NA	NA	NA	NA	NA	NA	NA	NA	NA	NA
VI.156.06	NA	NA	NA	NA	NA	NA	NA	NA	NA	NA	NA	NA	NA	NA	NA	NA	NA	NA	NA	NA	NA	NA	NA	NA	NA	NA	NA	NA	NA	NA	NA	NA	NA	NA	NA	NA	NA	NA	NA	NA	NA	NA	NA	NA	NA	NA	NA	NA	NA
SY.13.06	NA	NA	NA	NA	NA	NA	NA	NA	NA	NA	NA	NA	NA	NA	NA	NA	NA	NA	NA	NA	NA	NA	NA	NA	NA	NA	NA	NA	NA	NA	NA	NA	NA	NA	NA	NA	NA	NA	NA	NA	NA	NA	NA	NA	NA	NA	NA	NA	NA
SY.15.06	NA	NA	NA	NA	NA	NA	NA	NA	NA	NA	NA	NA	NA	NA	NA	NA	NA	NA	NA	NA	NA	NA	NA	NA	NA	NA	NA	NA	NA	NA	NA	NA	NA	NA	NA	NA	NA	NA	NA	NA	NA	NA	NA	NA	NA	NA	NA	NA	NA
SY.16.06	NA	NA	NA	NA	NA	NA	NA	NA	NA	NA	NA	NA	NA	NA	NA	NA	NA	NA	NA	NA	NA	NA	NA	NA	NA	NA	NA	NA	NA	NA	NA	NA	NA	NA	NA	NA	NA	NA	NA	NA	NA	NA	NA	NA	NA	NA	NA	NA	NA
VI.149.06	NA	NA	NA	NA	NA	NA	NA	NA	NA	NA	NA	NA	NA	NA	NA	NA	NA	NA	NA	NA	NA	NA	NA	NA	NA	NA	NA	NA	NA	NA	NA	NA	NA	NA	NA	NA	NA	NA	NA	NA	NA	NA	NA	NA	NA	NA	NA	NA	NA
VI.153.06	NA	NA	NA	NA	NA	NA	NA	NA	NA	NA	NA	NA	NA	NA	NA	NA	NA	NA	NA	NA	NA	NA	NA	NA	NA	NA	NA	NA	NA	NA	NA	NA	NA	NA	NA	NA	NA	NA	NA	NA	NA	NA	NA	NA	NA	NA	NA	NA	NA
Sing.57.06	NA	NA	NA	NA	NA	NA	NA	NA	NA	NA	NA	NA	NA	NA	NA	NA	NA	NA	NA	NA	NA	NA	NA	NA	NA	NA	NA	NA	NA	NA	NA	NA	NA	NA	NA	NA	NA	NA	NA	NA	NA	NA	NA	NA	NA	NA	NA	NA	NA
SA.3.06	NA	NA	NA	NA	NA	NA	NA	NA	NA	NA	NA	NA	NA	NA	NA	NA	NA	NA	NA	NA	NA	NA	NA	NA	NA	NA	NA	NA	NA	NA	NA	NA	NA	NA	NA	NA	NA	NA	NA	NA	NA	NA	NA	NA	NA	NA	NA	NA	NA
JO.177.06	NA	NA	NA	NA	NA	NA	NA	NA	NA	NA	NA	NA	NA	NA	NA	NA	NA	NA	NA	NA	NA	NA	NA	NA	NA	NA	NA	NA	NA	NA	NA	NA	NA	NA	NA	NA	NA	NA	NA	NA	NA	NA	NA	NA	NA	NA	NA	NA	NA
JO.429.06	NA	NA	NA	NA	NA	NA	NA	NA	NA	NA	NA	NA	NA	NA	NA	NA	NA	NA	NA	NA	NA	NA	NA	NA	NA	NA	NA	NA	NA	NA	NA	NA	NA	NA	NA	NA	NA	NA	NA	NA	NA	NA	NA	NA	NA	NA	NA	NA	NA
VI.148.06	NA	NA	NA	NA	NA	NA	NA	NA	NA	NA	NA	NA	NA	NA	NA	NA	NA	NA	NA	NA	NA	NA	NA	NA	NA	NA	NA	NA	NA	NA	NA	NA	NA	NA	NA	NA	NA	NA	NA	NA	NA	NA	NA	NA	NA	NA	NA	NA	NA
SY.17.06	NA	NA	NA	NA	NA	NA	NA	NA	NA	NA	NA	NA	NA	NA	NA	NA	NA	NA	NA	NA	NA	NA	NA	NA	NA	NA	NA	NA	NA	NA	NA	NA	NA	NA	NA	NA	NA	NA	NA	NA	NA	NA	NA	NA	NA	NA	NA	NA	NA
Bris.46.06	NA	NA	NA	NA	NA	NA	NA	NA	NA	NA	NA	NA	NA	NA	NA	NA	NA	NA	NA	NA	NA	NA	NA	NA	NA	NA	NA	NA	NA	NA	NA	NA	NA	NA	NA	NA	NA	NA	NA	NA	NA	NA	NA	NA	NA	NA	NA	NA	NA
Perth.16.06	NA	NA	NA	NA	NA	NA	NA	NA	NA	NA	NA	NA	NA	NA	NA	NA	NA	NA	NA	NA	NA	NA	NA	NA	NA	NA	NA	NA	NA	NA	NA	NA	NA	NA	NA	NA	NA	NA	NA	NA	NA	NA	NA	NA	NA	NA	NA	NA	NA
JO.501.06	NA	NA	NA	NA	NA	NA	NA	NA	NA	NA	NA	NA	NA	NA	NA	NA	NA	NA	NA	NA	NA	NA	NA	NA	NA	NA	NA	NA	NA	NA	NA	NA	NA	NA	NA	NA	NA	NA	NA	NA	NA	NA	NA	NA	NA	NA	NA	NA	NA
Thailand.86.06	NA	NA	NA	NA	NA	NA	NA	NA	NA	NA	NA	NA	NA	NA	NA	NA	NA	NA	NA	NA	NA	NA	NA	NA	NA	NA	NA	NA	NA	NA	NA	NA	NA	NA	NA	NA	NA	NA	NA	NA	NA	NA	NA	NA	NA	NA	NA	NA	NA
Auckland.47.06	NA	NA	NA	NA	NA	NA	NA	NA	NA	NA	NA	NA	NA	NA	NA	NA	NA	NA	NA	NA	NA	NA	NA	NA	NA	NA	NA	NA	NA	NA	NA	NA	NA	NA	NA	NA	NA	NA	NA	NA	NA	NA	NA	NA	NA	NA	NA	NA	NA
SA.4.06	NA	NA	NA	NA	NA	NA	NA	NA	NA	NA	NA	NA	NA	NA	NA	NA	NA	NA	NA	NA	NA	NA	NA	NA	NA	NA	NA	NA	NA	NA	NA	NA	NA	NA	NA	NA	NA	NA	NA	NA	NA	NA	NA	NA	NA	NA	NA	NA	NA
Auckland.61.06	NA	NA	NA	NA	NA	NA	NA	NA	NA	NA	NA	NA	NA	NA	NA	NA	NA	NA	NA	NA	NA	NA	NA	NA	NA	NA	NA	NA	NA	NA	NA	NA	NA	NA	NA	NA	NA	NA	NA	NA	NA	NA	NA	NA	NA	NA	NA	NA	NA
Auckland.75.06	NA	NA	NA	NA	NA	NA	NA	NA	NA	NA	NA	NA	NA	NA	NA	NA	NA	NA	NA	NA	NA	NA	NA	NA	NA	NA	NA	NA	NA	NA	NA	NA	NA	NA	NA	NA	NA	NA	NA	NA	NA	NA	NA	NA	NA	NA	NA	NA	NA
JO.510.6	NA	NA	NA	NA	NA	NA	NA	NA	NA	NA	NA	NA	NA	NA	NA	NA	NA	NA	NA	NA	NA	NA	NA	NA	NA	NA	NA	NA	NA	NA	NA	NA	NA	NA	NA	NA	NA	NA	NA	NA	NA	NA	NA	NA	NA	NA	NA	NA	NA
SY.18.06	NA	NA	NA	NA	NA	NA	NA	NA	NA	NA	NA	NA	NA	NA	NA	NA	NA	NA	NA	NA	NA	NA	NA	NA	NA	NA	NA	NA	NA	NA	NA	NA	NA	NA	NA	NA	NA	NA	NA	NA	NA	NA	NA	NA	NA	NA	NA	NA	NA
CC.20.06	NA	NA	NA	NA	NA	NA	NA	NA	NA	NA	NA	NA	NA	NA	NA	NA	NA	NA	NA	NA	NA	NA	NA	NA	NA	NA	NA	NA	NA	NA	NA	NA	NA	NA	NA	NA	NA	NA	NA	NA	NA	NA	NA	NA	NA	NA	NA	NA	NA
Sing.29.06	NA	NA	NA	NA	NA	NA	NA	NA	NA	NA	NA	NA	NA	NA	NA	NA	NA	NA	NA	NA	NA	NA	NA	NA	NA	NA	NA	NA	NA	NA	NA	NA	NA	NA	NA	NA	NA	NA	NA	NA	NA	NA	NA	NA	NA	NA	NA	NA	NA
Bris.9.06	NA	NA	NA	NA	NA	NA	NA	NA	NA	NA	NA	NA	NA	NA	NA	NA	NA	NA	NA	NA	NA	NA	NA	NA	NA	NA	NA	NA	NA	NA	NA	NA	NA	NA	NA	NA	NA	NA	NA	NA	NA	NA	NA	NA	NA	NA	NA	NA	NA
Nepal.921.06	NA	NA	NA	NA	NA	NA	NA	NA	NA	NA	NA	NA	NA	NA	NA	NA	NA	NA	NA	NA	NA	NA	NA	NA	NA	NA	NA	NA	NA	NA	NA	NA	NA	NA	NA	NA	NA	NA	NA	NA	NA	NA	NA	NA	NA	NA	NA	NA	NA
Bris.4.07	NA	NA	NA	NA	NA	NA	NA	NA	NA	NA	NA	NA	NA	NA	NA	NA	NA	NA	NA	NA	NA	NA	NA	NA	NA	NA	NA	NA	NA	NA	NA	NA	NA	NA	NA	NA	NA	NA	NA	NA	NA	NA	NA	NA	NA	NA	NA	NA	NA
Bris.10.07	NA	NA	NA	NA	NA	NA	NA	NA	NA	NA	NA	NA	NA	NA	NA	NA	NA	NA	NA	NA	NA	NA	NA	NA	NA	NA	NA	NA	NA	NA	NA	NA	NA	NA	NA	NA	NA	NA	NA	NA	NA	NA	NA	NA	NA	NA	NA	NA	NA
Perth.27.07	NA	NA	NA	NA	NA	NA	NA	NA	NA	NA	NA	NA	NA	NA	NA	NA	NA	NA	NA	NA	NA	NA	NA	NA	NA	NA	NA	NA	NA	NA	NA	NA	NA	NA	NA	NA	NA	NA	NA	NA	NA	NA	NA	NA	NA	NA	NA	NA	NA
PH.1616.07	NA	NA	NA	NA	NA	NA	NA	NA	NA	NA	NA	NA	NA	NA	NA	NA	NA	NA	NA	NA	NA	NA	NA	NA	NA	NA	NA	NA	NA	NA	NA	NA	NA	NA	NA	NA	NA	NA	NA	NA	NA	NA	NA	NA	NA	NA	NA	NA	NA
Wis.3.07	NA	NA	NA	NA	NA	NA	NA	NA	NA	NA	NA	NA	NA	NA	NA	NA	NA	NA	NA	NA	NA	NA	NA	NA	NA	NA	NA	NA	NA	NA	NA	NA	NA	NA	NA	NA	NA	NA	NA	NA	NA	NA	NA	NA	NA	NA	NA	NA	NA
Bris.202.07	NA	NA	NA	NA	NA	NA	NA	NA	NA	NA	NA	NA	NA	NA	NA	NA	NA	NA	NA	NA	NA	NA	NA	NA	NA	NA	NA	NA	NA	NA	NA	NA	NA	NA	NA	NA	NA	NA	NA	NA	NA	NA	NA	NA	NA	NA	NA	NA	NA
Bris.229.07	NA	NA	NA	NA	NA	NA	NA	NA	NA	NA	NA	NA	NA	NA	NA	NA	NA	NA	NA	NA	NA	NA	NA	NA	NA	NA	NA	NA	NA	NA	NA	NA	NA	NA	NA	NA	NA	NA	NA	NA	NA	NA	NA	NA	NA	NA	NA	NA	NA
Uru.716.07	NA	NA	NA	NA	NA	NA	NA	NA	NA	NA	NA	NA	NA	NA	NA	NA	NA	NA	NA	NA	NA	NA	NA	NA	NA	NA	NA	NA	NA	NA	NA	NA	NA	NA	NA	NA	NA	NA	NA	NA	NA	NA	NA	NA	NA	NA	NA	NA	NA
FI.9.08	NA	NA	NA	NA	NA	NA	NA	NA	NA	NA	NA	NA	NA	NA	NA	NA	NA	NA	NA	NA	NA	NA	NA	NA	NA	NA	NA	NA	NA	NA	NA	NA	NA	NA	NA	NA	NA	NA	NA	NA	NA	NA	NA	NA	NA	NA	NA	NA	NA
JO.15.08	NA	NA	NA	NA	NA	NA	NA	NA	NA	NA	NA	NA	NA	NA	NA	NA	NA	NA	NA	NA	NA	NA	NA	NA	NA	NA	NA	NA	NA	NA	NA	NA	NA	NA	NA	NA	NA	NA	NA	NA	NA	NA	NA	NA	NA	NA	NA	NA	NA
HK.1952.09	NA	NA	NA	NA	NA	NA	NA	NA	NA	NA	NA	NA	NA	NA	NA	NA	NA	NA	NA	NA	NA	NA	NA	NA	NA	NA	NA	NA	NA	NA	NA	NA	NA	NA	NA	NA	NA	NA	NA	NA	NA	NA	NA	NA	NA	NA	NA	NA	NA
HK.1985.09	NA	NA	NA	NA	NA	NA	NA	NA	NA	NA	NA	NA	NA	NA	NA	NA	NA	NA	NA	NA	NA	NA	NA	NA	NA	NA	NA	NA	NA	NA	NA	NA	NA	NA	NA	NA	NA	NA	NA	NA	NA	NA	NA	NA	NA	NA	NA	NA	NA
Perth.16.09	NA	NA	NA	NA	NA	NA	NA	NA	NA	NA	NA	NA	NA	NA	NA	NA	NA	NA	NA	NA	NA	NA	NA	NA	NA	NA	NA	NA	NA	NA	NA	NA	NA	NA	NA	NA	NA	NA	NA	NA	NA	NA	NA	NA	NA	NA	NA	NA	NA
Wis.15.09	NA	NA	NA	NA	NA	NA	NA	NA	NA	NA	NA	NA	NA	NA	NA	NA	NA	NA	NA	NA	NA	NA	NA	NA	NA	NA	NA	NA	NA	NA	NA	NA	NA	NA	NA	NA	NA	NA	NA	NA	NA	NA	NA	NA	NA	NA	NA	NA	NA
VI.361.11	NA	NA	NA	NA	NA	NA	NA	NA	NA	NA	NA	NA	NA	NA	NA	NA	NA	NA	NA	NA	NA	NA	NA	NA	NA	NA	NA	NA	NA	NA	NA	NA	NA	NA	NA	NA	NA	NA	NA	NA	NA	NA	NA	NA	NA	NA	NA	NA	NA
TE.50.12	NA	NA	NA	NA	NA	NA	NA	NA	NA	NA	NA	NA	NA	NA	NA	NA	NA	NA	NA	NA	NA	NA	NA	NA	NA	NA	NA	NA	NA	NA	NA	NA	NA	NA	NA	NA	NA	NA	NA	NA	NA	NA	NA	NA	NA	NA	NA	NA	NA
Sam.73.13	NA	NA	NA	NA	NA	NA	NA	NA	NA	NA	NA	NA	NA	NA	NA	NA	NA	NA	NA	NA	NA	NA	NA	NA	NA	NA	NA	NA	NA	NA	NA	NA	NA	NA	NA	NA	NA	NA	NA	NA	NA	NA	NA	NA	NA	NA	NA	NA	NA
HK.146.13	NA	NA	NA	NA	NA	NA	NA	NA	NA	NA	NA	NA	NA	NA	NA	NA	NA	NA	NA	NA	NA	NA	NA	NA	NA	NA	NA	NA	NA	NA	NA	NA	NA	NA	NA	NA	NA	NA	NA	NA	NA	NA	NA	NA	NA	NA	NA	NA	NA
Saf.4655.13	NA	NA	NA	NA	NA	NA	NA	NA	NA	NA	NA	NA	NA	NA	NA	NA	NA	NA	NA	NA	NA	NA	NA	NA	NA	NA	NA	NA	NA	NA	NA	NA	NA	NA	NA	NA	NA	NA	NA	NA	NA	NA	NA	NA	NA	NA	NA	NA	NA
ST.6.14	NA	NA	NA	NA	NA	NA	NA	NA	NA	NA	NA	NA	NA	NA	NA	NA	NA	NA	NA	NA	NA	NA	NA	NA	NA	NA	NA	NA	NA	NA	NA	NA	NA	NA	NA	NA	NA	NA	NA	NA	NA	NA	NA	NA	NA	NA	NA	NA	NA
Norway.466.14	NA	NA	NA	NA	NA	NA	NA	NA	NA	NA	NA	NA	NA	NA	NA	NA	NA	NA	NA	NA	NA	NA	NA	NA	NA	NA	NA	NA	NA	NA	NA	NA	NA	NA	NA	NA	NA	NA	NA	NA	NA	NA	NA	NA	NA	NA	NA	NA	NA
Swit.9715293.13	NA	NA	NA	NA	NA	NA	NA	NA	NA	NA	NA	NA	NA	NA	NA	NA	NA	NA	NA	NA	NA	NA	NA	NA	NA	NA	NA	NA	NA	NA	NA	NA	NA	NA	NA	NA	NA	NA	NA	NA	NA	NA	NA	NA	NA	NA	NA	NA	NA
Slov.1944.14	NA	NA	NA	NA	NA	NA	NA	NA	NA	NA	NA	NA	NA	NA	NA	NA	NA	NA	NA	NA	NA	NA	NA	NA	NA	NA	NA	NA	NA	NA	NA	NA	NA	NA	NA	NA	NA	NA	NA	NA	NA	NA	NA	NA	NA	NA	NA	NA	NA
Norway.3004.14	NA	NA	NA	NA	NA	NA	NA	NA	NA	NA	NA	NA	NA	NA	NA	NA	NA	NA	NA	NA	NA	NA	NA	NA	NA	NA	NA	NA	NA	NA	NA	NA	NA	NA	NA	NA	NA	NA	NA	NA	NA	NA	NA	NA	NA	NA	NA	NA	NA
NL.525.14	NA	NA	NA	NA	NA	NA	NA	NA	NA	NA	NA	NA	NA	NA	NA	NA	NA	NA	NA	NA	NA	NA	NA	NA	NA	NA	NA	NA	NA	NA	NA	NA	NA	NA	NA	NA	NA	NA	NA	NA	NA	NA	NA	NA	NA	NA	NA	NA	NA
HK.5738.14	NA	NA	NA	NA	NA	NA	NA	NA	NA	NA	NA	NA	NA	NA	NA	NA	NA	NA	NA	NA	NA	NA	NA	NA	NA	NA	NA	NA	NA	NA	NA	NA	NA	NA	NA	NA	NA	NA	NA	NA	NA	NA	NA	NA	NA	NA	NA	NA	NA
HK.4801.14	NA	NA	NA	NA	NA	NA	NA	NA	NA	NA	NA	NA	NA	NA	NA	NA	NA	NA	NA	NA	NA	NA	NA	NA	NA	NA	NA	NA	NA	NA	NA	NA	NA	NA	NA	NA	NA	NA	NA	NA	NA	NA	NA	NA	NA	NA	NA	NA	NA
Georgia.532.15	NA	NA	NA	NA	NA	NA	NA	NA	NA	NA	NA	NA	NA	NA	NA	NA	NA	NA	NA	NA	NA	NA	NA	NA	NA	NA	NA	NA	NA	NA	NA	NA	NA	NA	NA	NA	NA	NA	NA	NA	NA	NA	NA	NA	NA	NA	NA	NA	NA
EN.929.16	NA	NA	NA	NA	NA	NA	NA	NA	NA	NA	NA	NA	NA	NA	NA	NA	NA	NA	NA	NA	NA	NA	NA	NA	NA	NA	NA	NA	NA	NA	NA	NA	NA	NA	NA	NA	NA	NA	NA	NA	NA	NA	NA	NA	NA	NA	NA	NA	NA
Norway.3798.16	NA	NA	NA	NA	NA	NA	NA	NA	NA	NA	NA	NA	NA	NA	NA	NA	NA	NA	NA	NA	NA	NA	NA	NA	NA	NA	NA	NA	NA	NA	NA	NA	NA	NA	NA	NA	NA	NA	NA	NA	NA	NA	NA	NA	NA	NA	NA	NA	NA
[truncated: 68 more columns]
